# Supplementary material for: Saturated-blue-emitting [3+2+1] coordinated iridium(iii) complexes for vacuum-deposited organic light-emitting devices
Source: Royal Society of Chemistry journal article supplement (doi:10.1039/d2tc02829h), 2022-01-01
Supplement: d2tc02829h1.pdf [file d2tc02829h1.pdf]

## Supporting Information

### **Saturated-Blue-Emitting [3+2+1] Coordinated Iridium(III) Complexes for Vacuum-Deposited Organic Light-Emitting Devices**

Meng Zhang,<sup>a,b,#</sup> Maggie Ng,<sup>c,#</sup> Chengcheng Wu,<sup>a,b,#</sup> Kai-Ning Tong,<sup>a,b</sup> Wansi Li,<sup>a,b</sup>  
Yuan Wu,<sup>d</sup> Chen Yang,<sup>d,\*</sup> Min Wang<sup>b</sup>, Man-Chung Tang,<sup>b\*</sup> and Guodan Wei<sup>a,b\*</sup>

<sup>a</sup> Tsinghua-Berkeley Shenzhen Institute (TBSI), Tsinghua University, Shenzhen, 518055, China

<sup>b</sup> Institute of Materials Research, Tsinghua Shenzhen International Graduate School, Tsinghua University, Shenzhen, 518055, China

<sup>c</sup> Department of Chemistry, Jeonbuk National University, Jeonju, 54896, Korea

<sup>d</sup> PURI Materials, 518133, Shenzhen, China

# These two authors are contributed equally.

E-mail:david\_yang@purimat.com;kobetang2021@sz.tsinghua.edu.cn;  
weiguodan@sz.tsinghua.edu.cn

## Contents

|                                                                                |         |
|--------------------------------------------------------------------------------|---------|
| Experimental section.....                                                      | S2–S13  |
| NMR Spectra.....                                                               | S14–S21 |
| ESI-MS of iridium(III) complexes.....                                          | S22–S29 |
| HPLC of iridium(III) complexes.....                                            | S30–S33 |
| Thermal properties.....                                                        | S34     |
| Photophysical measurements.....                                                | S35–S41 |
| Computational details and data.....                                            | S42–S57 |
| Device.....                                                                    | S58–S59 |
| Blue phosphorescent and TADF materials with lifetimes less than 1 $\mu$ s..... | S60     |
| References.....                                                                | S61–S64 |

## EXPERIMENTAL SECTION

**Materials.** Reagents and solvents employed were commercially available without further purification.

**Characterization Method.** NMR spectra ( $^1\text{H}$ ,  $^{19}\text{F}$  NMR) were recorded on a 400 NMR spectrometer (Bruker). Chemical shifts in  $^1\text{H}$  NMR spectra were referenced to tetramethylsilane (TMS) at 0.00 ppm.

The absorption and phosphorescence spectra were performed using a UV-vis spectrophotometer (Cary 5000 UV-vis-NIR, Agilent, USA) and a spectrofluorometer (Edinburgh Instruments Ltd FS5), respectively. Electrochemical measurements were performed with a PalmSens4 electrochemical work station with platinum-carbon as working electrode, platinum wire as the counter electrode, and a saturated calomel electrode (SCE) in saturated KCl aqueous solution as the reference electrode. The cyclic voltammogram was referenced to the ferrocene/ferrocenium couple at a scan rate of  $100\text{ mV s}^{-1}$ . Thermogravimetric analysis (TGA) was performed on a Mettler TGA2 thermogravimeter by measuring the weight loss from  $25^\circ\text{C}$  to  $100^\circ\text{C}$  at a rate of  $10^\circ\text{C}/\text{min}$  under nitrogen. After 15 minutes, heating from  $100^\circ\text{C}$  to  $800^\circ\text{C}$  at a rate of  $10^\circ\text{C}/\text{min}$  under nitrogen.

**Device Fabrication.** The ITO (indium-tin oxide) coated glass substrates were first cleaned in deionized water, acetone, and ethanol, then dried in an oven and treated by ultraviolet ozone exposure for 20 min. Device fabrication were performed with a FS-450(Suzhou Fangsheng) chamber. All organic layers were thermally evaporated at a rate of  $0.5\text{-}1.5\text{ \AA s}^{-1}$  at a pressure of *ca.*  $7.5 \times 10^{-7}$  Torr. A Liq layer (2.5 nm) was

deposited at a rate of  $0.2 \text{ \AA s}^{-1}$ . The Al cathode was deposited at a rate of  $4 \text{ \AA s}^{-1}$ ; the active area of the diode segments was  $3 \times 3 \text{ mm}^2$ . The PHOLEDs devices performance including EL spectra, current density-voltage-luminance ( $J$ - $V$ - $L$ ) curves and Commission Internationale de L'Eclairage (CIE) coordinates were characterized by a Keithley 2400 semiconductor characterization system.

### Materials Synthesis

***N*-(3,4-dimethylphenyl)-3-nitropyridin-2-amine:** 2-Chloro-3-nitropyridine (3.0 g, 18.9 mmol), 3,4-dimethylaniline (2.8 g, 22.7 mmol), and triethylamine (2.4 g, 23.6 mmol) were refluxed with 50 mL of 2-propanol for 24 h. Afterward, the reaction mixture was concentrated and extracted with diethyl ether. *N*-(3,4-dimethylphenyl)-3-nitropyridin-2-amine (2.2 g, 48%) was obtained:  $^1\text{H NMR}$  (400 MHz, Chloroform-*d*)  $\delta$  10.00 (s, 1H), 8.51 (dd,  $J = 8.3, 1.8 \text{ Hz}$ , 1H), 8.46 (dd,  $J = 4.5, 1.8 \text{ Hz}$ , 1H), 7.37 – 7.33 (m, 2H), 7.16 (d,  $J = 7.9 \text{ Hz}$ , 1H), 6.78 (dd,  $J = 8.3, 4.5 \text{ Hz}$ , 1H), 2.29 (s, 3H), 2.26 (s, 3H).

***N*-(3,4,5-trimethylphenyl)-3-nitropyridin-2-amine:** 2-Chloro-3-nitropyridine (3.0 g, 18.9 mmol), 3,4,5-trimethylaniline (3.1 g, 22.7 mmol), and triethylamine (2.4 g, 23.6 mmol) were refluxed with 50 mL of 2-propanol for 24 h. Afterward, the reaction mixture was concentrated and extracted with diethyl ether. 3-nitro-*N*-(3,4,5-trimethylphenyl)pyridin-2-amine (4.4 g, 91%) was obtained:  $^1\text{H NMR}$  (400 MHz, Chloroform-*d*)  $\delta$  9.95 (s, 1H), 8.50 (dd,  $J = 8.4, 1.8 \text{ Hz}$ , 1H), 8.46 (dd,  $J = 4.5, 1.8 \text{ Hz}$ , 1H), 7.23 (s, 2H), 6.77 (dd,  $J = 8.3, 4.4 \text{ Hz}$ , 1H), 2.31 (s, 6H), 2.17 (s, 3H).

***3*-(3,4-dimethylphenyl)-3*H*-imidazo[4,5-*b*]pyridine:** *N*-(3,4-dimethylphenyl)-3-nitropyridin-2-amine (4.86 g, 12.4 mmol), formic acid (122 g, 2.66 mol), ammonium

chloride (11.2 g, 0.21 mol), and iron powder (100 mesh, 11.7 g, 0.21 mol) were suspended in 40 mL of 2-propanol and refluxed for 48 h. Afterward, the reaction mixture was concentrated to dryness, washed with 200 mL of a saturated aqueous NaHCO<sub>3</sub> solution, and extracted with dichloromethane; organics were dried over MgSO<sub>4</sub>, and volatiles were removed. The product was obtained in 86% yield (3.85 g): <sup>1</sup>H NMR (400 MHz, Chloroform-*d*) δ 8.46 (dd, *J* = 4.8, 1.4 Hz, 1H), 8.30 (s, 1H), 8.15 (d, *J* = 8.0 Hz, 1H), 7.48 (s, 1H), 7.43 (dd, *J* = 8.0, 2.3 Hz, 1H), 7.33 – 7.29 (m, 2H), 2.37 (s, 3H), 2.34 (s, 3H).

***3-(3,4,5-trimethylphenyl)-3H-imidazo[4,5-b]pyridine***: *N*-(3,4,5-trimethylphenyl)-3-nitropyridin-2-amine (7.72 g, 30.0 mmol), formic acid (183.6 g, 3.99 mol), ammonium chloride (16.6 g, 0.31 mol), and iron powder (100 mesh, 17.3 g, 0.31 mol) were suspended in 80 mL of 2-propanol and refluxed for 48 h. Afterward, the reaction mixture was concentrated to dryness, washed with a saturated aqueous NaHCO<sub>3</sub> solution, and extracted with dichloromethane; organics were dried over MgSO<sub>4</sub>, and volatiles were removed. The product was obtained in 71% yield (5.03 g): <sup>1</sup>H NMR (400 MHz, Chloroform-*d*) δ 8.45 (dd, *J* = 4.8, 1.5 Hz, 1H), 8.27 (s, 1H), 8.14 (dd, *J* = 8.0, 1.5 Hz, 1H), 7.32 (s, 2H), 7.29 (dd, *J* = 8.1, 4.8 Hz, 1H), 2.38 (s, 6H), 2.24 (s, 3H).

***1-methyl-3-(3,4-dimethylphenyl)-3H-imidazo[4,5-b]pyridin-1-ium iodide (pmpMe<sub>2</sub>)***: 3-(3,4-dimethylphenyl)-3H-imidazo[4,5-b]pyridine (3.85 g, 17.2 mmol) and methyl iodide (2.4 g, 17.2 mmol) were dissolved in 20 mL of THF and stirred at 60 °C for 72 h in Schlenk tube. Afterward, the precipitate was filtered, washed with diethyl ether, and dried in vacuo. The product was obtained in 38% yield (2.37 g): <sup>1</sup>H NMR (400

MHz, DMSO-*d*<sub>6</sub>) δ 10.33 (s, 1H), 8.81 (d, *J* = 4.7 Hz, 1H), 8.68 (dd, *J* = 8.4, 1.4 Hz, 1H), 7.87 (dd, *J* = 8.4, 4.7 Hz, 1H), 7.67 (s, 1H), 7.62 (dd, *J* = 8.0, 2.3 Hz, 1H), 7.49 (d, *J* = 8.1 Hz, 1H), 4.18 (s, 3H), 2.36 (s, 6H).

***1-methyl-3-(3,4,5-trimethylphenyl)-3H-imidazo[4,5-b]pyridin-1-iumiodide(pmpMe<sub>3</sub>):*** 3-(3,4,5-trimethylphenyl)-3H-imidazo[4,5-b]pyridine (5.0 g, 21.2 mmol) and methyl iodide (3.0 g, 21.2 mmol) were dissolved in 20 mL of THF and stirred at 60 °C for 72 h in Schlenk tube. Afterward, the precipitate was filtered, washed with diethyl ether, and dried in vacuo. The product was obtained in 74% yield (5.96 g): <sup>1</sup>H NMR (400 MHz, DMSO-*d*<sub>6</sub>) δ 10.32 (d, *J* = 2.5 Hz, 1H), 8.81 (dd, *J* = 4.8, 1.4 Hz, 1H), 8.67 (d, *J* = 8.4 Hz, 1H), 7.87 (dd, *J* = 8.4, 4.8 Hz, 1H), 7.54 (s, 2H), 4.18 (s, 3H), 2.38 (s, 6H), 2.25 (s, 3H).

***1-benzyl-3-(3,4-dimethylphenyl)-3H-imidazo[4,5-b]pyridin-1-ium bromide (pmpMe<sub>2</sub>Bz):*** 3-(3,4-dimethylphenyl)-3H-imidazo[4,5-b]pyridine (9.8 g, 43.7 mmol) and benzyl bromide (7.5 g, 43.7 mmol) were dissolved in 20 mL of THF and stirred at 110 °C for 24 h in Schlenk tube. Afterward, the precipitate was filtered, washed with diethyl ether, and dried in vacuo. The product was obtained in 31% yield (5.4 g, %): <sup>1</sup>H NMR (400 MHz, Chloroform-*d*) δ 11.76 (s, 1H), 8.71 (dd, *J* = 4.7, 1.3 Hz, 1H), 8.21 (dd, *J* = 8.5, 1.4 Hz, 1H), 7.84 (d, *J* = 2.4 Hz, 1H), 7.78 (dd, *J* = 8.1, 2.4 Hz, 1H), 7.67 (dd, *J* = 7.5, 2.0 Hz, 2H), 7.58 (dd, *J* = 8.4, 4.7 Hz, 1H), 7.38 – 7.34 (m, 4H), 6.28 (s, 2H), 2.38 (s, 3H), 2.34 (s, 3H).

***1-benzyl-3-(3,4,5-trimethylphenyl)-3H-imidazo[4,5-b]pyridin-1-ium bromide(pmpMe<sub>3</sub>Bz):*** 3-Phenyl-3H-imidazo[4,5-b]pyridine (5.8 g, 24.4 mmol) and

benzyl bromide (4.2 g, 24.4 mmol) were dissolved in 20 mL of THF and stirred at 110 °C for 24 h in Schlenk tube. Afterward, the precipitate was filtered, washed with diethyl ether, and dried in vacuo. The product was obtained in 74% yield (7.4 g): <sup>1</sup>H NMR (400 MHz, Chloroform-*d*) δ 11.68 (s, 1H), 8.70 (d, *J* = 4.4 Hz, 1H), 8.23 (d, *J* = 8.3 Hz, 1H), 7.68 – 7.66 (m, 4H), 7.57 (dd, *J* = 8.4, 4.7 Hz, 1H), 7.40 – 7.32 (m, 3H), 6.29 (s, 2H), 2.39 (s, 6H), 2.24 (s, 3H).

**General Synthesis of Iridium Complexes.** Under the protection of N<sub>2</sub>, **pbib** (0.90 mmol, 435.9 mg) and [Ir(COD)Cl]<sub>2</sub> (0.45 mmol, 300.0 mg) were added to a mixture of triethylamine (1 mL) and acetonitrile (15 mL) in Schlenk tube. The suspension was heated at 90 °C for 12 h. After cooling, the solvent was removed off by rotary evaporation to give yellow solid. Then the yellow solid was dissolved in 2-ethoxyethanol (10 mL), and NHC precursors (0.90 mmol) and triethylamine (1 ml) was added to the solution and heated at 150°C under N<sub>2</sub>. After cooling to room temperature, 2-ethoxyethanol was distilled under the low pressure. The crude product was purified by silica gel column to afford the intermediate product. Then, the intermediate product was recrystallized in CH<sub>2</sub>Cl<sub>2</sub>/diethyl ether.

Under the protection of N<sub>2</sub>, the intermediate product and the double molar quantity of AgCN were dissolved in a round-bottom flask containing 20 mL of *N,N*-dimethylformamide (DMF). The suspension was heated at 100 °C under N<sub>2</sub> for 2 h. After cooling, the solvent was filtered and removed off by rotary evaporation to afford the crude product. The crude product was purified by silica gel column to afford the expected product. Then, the expected product was recrystallized in CH<sub>2</sub>Cl<sub>2</sub>/diethyl

ether.

**(pbib)Ir(pmpMe<sub>2</sub>)I**: Under the protection of N<sub>2</sub>, **pbib** (0.90 mmol, 435.9 mg) and [Ir(COD)Cl]<sub>2</sub> (0.45 mmol, 300.0 mg) were added to a mixture of triethylamine (1 mL) and acetonitrile (10 mL) in Schlenk tube. The suspension was heated at 90 °C for 12 h. After cooling, the solvent was distilled by rotary evaporation to give yellow solid. Then the yellow solid was dissolved in 2-ethoxyethanol (10 mL), and **pmpMe<sub>2</sub>** (0.90 mmol, 328.7 mg) and triethylamine (1 ml) was added to the solution and heated at 150°C for 24 h under N<sub>2</sub>. After cooling to room temperature, 2-ethoxyethanol was distilled under the low pressure. The crude product was purified by silica gel column (eluent = dichloromethane/petroleum ether 3:1 v/v) to afford the expected product (376.2 mg, 47%). <sup>1</sup>H NMR (400 MHz, Chloroform-*d*) δ 8.52 (s, 1H), 8.47 (dd, *J* = 5.0, 1.4 Hz, 1H), 7.78 (dd, *J* = 8.0, 1.4 Hz, 1H), 7.43 (d, *J* = 2.0 Hz, 2H), 7.32 (dd, *J* = 8.0, 5.0 Hz, 1H), 7.24 – 7.20 (m, 3H), 6.67 (d, *J* = 2.1 Hz, 2H), 5.57 (s, 1H), 4.80 (s, 3H), 3.50 – 3.43 (m, 2H), 3.40 – 3.33 (m, 2H), 2.14 (s, 3H), 1.82 (s, 3H), 1.43 – 1.34 (m, 2H), 1.10 – 0.99 (m, 2H), 0.83 – 0.73 (m, 2H), 0.58 – 0.48 (m, 8H). ESI-MS *m/z* [(**pbib**)Ir(**pmpMe<sub>2</sub>**)I+H]<sup>+</sup> calcd for C<sub>35</sub>H<sub>40</sub>IIrN<sub>7</sub> 878.2019, found 878.2008.

**(pbib)Ir(pmpMe<sub>2</sub>)CN**: Under the protection of N<sub>2</sub>, (**pbib**)Ir(**pmpMe<sub>2</sub>**)I (0.34 mmol, 300.0 mg) and the double molar quantity of AgCN (0.68 mmol, 91.6 mg) were dissolved in a round-bottom flask containing 20 mL of *N,N*-dimethylformamide (DMF). The suspension was heated at 100 °C under N<sub>2</sub> for 2 h. After cooling, the solvent was filtered and removed off by rotary evaporation to afford the crude product.



The crude product was purified by silica gel column (eluent = dichloromethane/ethyl acetate 3:1 v/v) to afford the expected product. Then, the expected product was recrystallized in CH<sub>2</sub>Cl<sub>2</sub>/diethyl ether (251.5 mg, 95%). <sup>1</sup>H NMR (400 MHz, Chloroform-*d*) δ 8.54 (s, 1H), 8.49 (dd, *J* = 5.0, 1.4 Hz, 1H), 7.82 (dd, *J* = 8.0, 1.4 Hz, 1H), 7.46 (d, *J* = 2.1 Hz, 2H), 7.39 – 7.27 (m, 2H), 7.25 – 7.18 (m, 2H), 6.71 (d, *J* = 2.1 Hz, 2H), 5.60 (s, 1H), 4.60 (s, 3H), 3.38 – 3.25 (m, 4H), 2.14 (s, 3H), 1.80 (s, 3H), 1.42 – 1.34 (m, 2H), 1.10 – 0.99 (m, 2H), 0.83 – 0.74 (m, 2H), 0.59 – 0.48 (m, 8H). <sup>13</sup>C NMR (125 MHz, Chloroform-*d*) δ 191.62, 163.72, 146.85, 145.64, 145.25 (2C), 143.34, 136.16, 136.06, 132.41, 129.60, 129.01 (2C), 128.81, 128.74, 128.26, 122.89, 119.06 (2C), 117.70, 117.48, 116.20, 115.85 (2C), 107.65 (2C), 52.56, 50.86 (2C), 33.03, 19.81 (2C), 19.79, 19.76, 13.44 (2C). [(**pbib**)Ir(**pmpMe**<sub>2</sub>)CN+H]<sup>+</sup> calcd for C<sub>36</sub>H<sub>40</sub>IrN<sub>8</sub> 777.3005, C 55.51; H 5.43; N14.38; found 777.2993, C 54.64; H 5.048; N 13.7.

**(pbib)Ir(pmpMe<sub>3</sub>)I**: Under the protection of N<sub>2</sub>, **pbib** (0.90 mmol, 435.9 mg) and [Ir(COD)Cl]<sub>2</sub> (0.45 mmol, 300.0 mg) were added to a mixture of triethylamine (1 mL) and acetonitrile (10 mL) in Schlenk tube. The suspension was heated at 90 °C for 12 h. After cooling, the solvent was distilled by rotary evaporation to give yellow solid. Then the yellow solid was dissolved in 2-ethoxyethanol (10 mL), and **pmpMe**<sub>3</sub> (0.90 mmol, 341.3 mg) and triethylamine (1 ml) was added to the solution and heated at 150°C for 24 h under N<sub>2</sub>. After cooling to room temperature, 2-ethoxyethanol was distilled under the low pressure. The crude product was purified by silica gel column (eluent = dichloromethane/petroleum ether 3:1 v/v) to afford the expected product (426.9 mg, 53%). <sup>1</sup>H NMR (400 MHz, Chloroform-*d*) δ 8.77 (s, 1H), 8.50 (dd, *J* = 4.9, 1.4 Hz, 1H),

7.76 (dd,  $J = 8.0, 1.2$  Hz, 1H), 7.47 (d,  $J = 2.1$  Hz, 2H), 7.32 (dd,  $J = 8.0, 4.9$  Hz, 1H), 7.18 (s, 3H), 6.70 (d,  $J = 2.0$  Hz, 2H), 4.72 (s, 3H), 3.31 – 3.18 (m, 4H), 2.27 (s, 3H), 1.89 (s, 3H), 1.40 – 1.30 (m, 2H), 1.20– 1.08 (m, 5H), 0.65 – 0.51 (m, 10H). ESI-MS  $m/z$  [(**pbib**)Ir(**pmpMe**<sub>3</sub>)I-I]<sup>+</sup> calcd for C<sub>36</sub>H<sub>41</sub>IrN<sub>7</sub> 764.3053, found 764.3055.

**(pbib)Ir(pmpMe<sub>3</sub>)CN**: Under the protection of N<sub>2</sub>, (**pbib**)Ir(**pmpMe**<sub>3</sub>)I (0.34 mmol, 300.0 mg) and the double molar quantity of AgCN (0.68 mmol, 91.6 mg) were dissolved in a round-bottom flask containing 20 mL of *N,N*-dimethylformamide (DMF). The suspension was heated at 100 °C under N<sub>2</sub> for 2 h. After cooling, the solvent was filtered and removed off by rotary evaporation to afford the crude product. The crude product was purified by silica gel column (eluent = dichloromethane/ethyl acetate 3:1 v/v) to afford the expected product. Then, the expected product was recrystallized in CH<sub>2</sub>Cl<sub>2</sub>/diethyl ether (244.7 mg, 91%). <sup>1</sup>H NMR (400 MHz, Chloroform-*d*) δ 8.80 (s, 1H), 8.54 (dd,  $J = 5.0, 1.4$  Hz, 1H), 7.82 (dd,  $J = 8.1, 1.5$  Hz, 1H), 7.53 (d,  $J = 2.1$  Hz, 2H), 7.37 (dd,  $J = 8.0, 5.0$  Hz, 1H), 7.33 – 7.30 (m, 1H), 7.22 – 7.20 (m, 2H), 6.76 (d,  $J = 2.1$  Hz, 2H), 4.51 (s, 3H), 3.20– 3.08 (m, 4H), 2.30 (s, 3H), 1.91 (s, 3H), 1.34 – 1.28 (m, 2H), 1.17 – 1.12 (m, 2H), 1.08 (s, 3H), 0.66 – 0.54 (m, 10H). ESI-MS  $m/z$  [(**pbib**)Ir(**pmpMe**<sub>3</sub>)CN+H]<sup>+</sup> calcd for C<sub>37</sub>H<sub>42</sub>IrN<sub>8</sub> 791.3162, C 55.58; H 5.31; N 14.40, found 791.3158, C 54.30; H 5.50; N 14.78.

**(pbib)Ir(pmpMe<sub>2</sub>Bz)Br**: Under the protection of N<sub>2</sub>, **pbib** (0.90 mmol, 435.9 mg) and [Ir(COD)Cl]<sub>2</sub> (0.45 mmol, 300.0 mg) were added to a mixture of triethylamine (1 mL) and acetonitrile (10 mL) in Schlenk tube. The suspension was heated at 90 °C for 12 h. After cooling, the solvent was distilled by rotary evaporation to give yellow solid. Then

the yellow solid was dissolved in 2-ethoxyethanol (10 mL), and **pmpMe<sub>2</sub>Bz** (0.90 mmol, 354.9 mg) and triethylamine (1 ml) was added to the solution and heated at 150 °C for 24 h under N<sub>2</sub>. After cooling to room temperature, 2-ethoxyethanol was distilled under the low pressure. The crude product was purified by silica gel column (eluent = dichloromethane/petroleum ether 3:1 v/v) to afford the expected product (445.8 mg, 55%). <sup>1</sup>H NMR (400 MHz, Chloroform-*d*) δ 8.48 (s, 1H), 8.43 (dd, *J* = 4.9, 1.4 Hz, 1H), 7.76 – 7.70 (m, 3H), 7.44 (d, *J* = 2.1 Hz, 2H), 7.34 – 7.26 (m, 3H), 7.25 – 7.18 (m, 4H), 6.74 (s, 2H), 6.65 (d, *J* = 2.1 Hz, 2H), 5.66 (s, 1H), 3.44 – 3.37 (m, 2H), 3.31 – 3.24 (m, 2H), 2.13 (s, 3H), 1.81 (s, 3H), 1.26 – 1.14 (m, 2H), 0.89 – 0.78 (m, 2H), 0.67 – 0.56 (m, 2H), 0.44 – 0.30 (m, 8H). ESI-MS *m/z* [(**pbib**)Ir(**pmpMe<sub>2</sub>Bz**)Br-Br]<sup>+</sup> calcd for C<sub>41</sub>H<sub>43</sub>IrN<sub>7</sub> 826.3209, found 826.3208.

**(pbib)Ir(pmpMe<sub>2</sub>Bz)CN**: Under the protection of N<sub>2</sub>, (pbib)Ir(pmpMe<sub>2</sub>Bz)Br (0.55 mmol, 500.0 mg) and the double molar quantity of AgCN (1.11 mmol, 148.0 mg) were dissolved in a round-bottom flask containing 20 mL of *N,N*-dimethylformamide (DMF). The suspension was heated at 100 °C under N<sub>2</sub> for 2 h. After cooling, the solvent was filtered and removed off by rotary evaporation to afford the crude product. The crude product was purified by silica gel column (eluent = dichloromethane/ethyl acetate 3:1 v/v) to afford the expected product. Then, the expected product was recrystallized in CH<sub>2</sub>Cl<sub>2</sub>/diethyl ether (423.7 mg, 90%). <sup>1</sup>H NMR (400 MHz, Chloroform-*d*) δ 8.55 (s, 1H), 8.49 (dd, *J* = 5.0, 1.4 Hz, 1H), 7.83 (dd, *J* = 8.1, 1.4 Hz, 1H), 7.63 (d, *J* = 7.2 Hz, 2H), 7.47 (d, *J* = 2.1 Hz, 2H), 7.39 – 7.29 (m, 5H), 7.22 (d, *J* = 7.4 Hz, 2H), 6.69 (d, *J* = 2.1 Hz, 2H), 6.36 (s, 2H), 5.60 (s, 1H), 3.24 – 3.12 (m, 4H),

2.13 (s, 3H), 1.79 (s, 3H), 1.20 – 1.10 (m, 2H), 0.88 – 0.75 (m, 2H), 0.68 – 0.55 (m, 2H), 0.43 (t,  $J = 7.1$  Hz, 6H), 0.37 – 0.27 (m, 2H). ESI-MS  $m/z$  [(**pbib**)Ir(**pmpMe<sub>2</sub>Bz**)CN+H]<sup>+</sup> calcd for C<sub>42</sub>H<sub>44</sub>IrN<sub>8</sub> 853.3318, C 58.99; H 5.42; N13.10, found 853.3325, C 54.54; H 4.80; N 12.89.

**(pbib)Ir(pmpMe<sub>3</sub>Bz)Br**: Under the protection of N<sub>2</sub>, **pbib** (0.90 mmol, 435.9 mg) and [Ir(COD)Cl]<sub>2</sub> (0.45 mmol, 300.0 mg) were added to a mixture of triethylamine (1 mL) and acetonitrile (10 mL) in Schlenk tube. The suspension was heated at 90 °C for 12 h. After cooling, the solvent was distilled by rotary evaporation to give yellow solid. Then the yellow solid was dissolved in 2-ethoxyethanol (10 mL), and **pmpMe<sub>3</sub>Bz** (0.90 mmol, 367.5 mg) and triethylamine (1 ml) was added to the solution and heated at 150°C for 24 h under N<sub>2</sub>. After cooling to room temperature, 2-ethoxyethanol was distilled under the low pressure. The crude product was purified by silica gel column (eluent = dichloromethane/petroleum ether 3:1 v/v) to afford the expected product (386.5 mg, 47%). <sup>1</sup>H NMR (400 MHz, Chloroform-*d*) δ 8.72 (s, 1H), 8.44 (dd,  $J = 5.0$ , 1.4 Hz, 1H), 7.76 (dd,  $J = 8.1$ , 1.5 Hz, 1H), 7.62 (dd,  $J = 7.5$ , 2.1 Hz, 2H), 7.48 (d,  $J = 2.1$  Hz, 2H), 7.25 – 7.21 (m, 4H), 7.19 – 7.15 (m, 3H), 6.73 (s, 2H), 6.69 (d,  $J = 2.0$  Hz, 2H), 3.22 – 3.09 (m, 4H), 2.26 (s, 3H), 1.90 (s, 3H), 1.23 – 1.14 (s, 5H), 0.92 – 0.81 (m, 2H), 0.56 – 0.40 (m, 10H). ESI-MS  $m/z$  [(**pbib**)Ir(**pmpMe<sub>3</sub>Bz**)Br-Br]<sup>+</sup> calcd for C<sub>42</sub>H<sub>45</sub>IrN<sub>7</sub> 840.3366, found 840.3373.

**(pbib)Ir(pmpMe<sub>3</sub>Bz)CN**: Under the protection of N<sub>2</sub>, (**pbib**)Ir(**pmpMe<sub>3</sub>Bz**)Br (0.51 mmol, 465.6 mg) and the double molar quantity of AgCN (1.01 mmol, 135.7 mg) were dissolved in a round-bottom flask containing 20 mL of *N,N*-dimethylformamide

(DMF). The suspension was heated at 100 °C under N<sub>2</sub> for 2 h. After cooling, the solvent was filtered and removed off by rotary evaporation to afford the crude product. The crude product was purified by silica gel column (eluent = dichloromethane/ethyl acetate 3:1 v/v) to afford the expected product. Then, the expected product was recrystallized in CH<sub>2</sub>Cl<sub>2</sub>/diethyl ether (401.7 mg, 91%). <sup>1</sup>H NMR (400 MHz, Chloroform-*d*) δ 8.77 (s, 1H), 8.48 (dd, *J* = 5.0, 1.4 Hz, 1H), 7.82 (dd, *J* = 8.0, 1.4 Hz, 1H), 7.60 (s, 2H), 7.52 (d, *J* = 2.1 Hz, 2H), 7.29 – 7.25 (m, 5H), 7.19 (d, *J* = 7.2 Hz, 2H), 6.72 (d, *J* = 2.1 Hz, 2H), 6.36 (s, 2H), 3.06 – 2.95 (m, 4H), 2.26 (s, 3H), 1.88 (s, 3H), 1.20 – 1.08 (m, 2H), 1.05 (s, 3H), 0.90 – 0.79 (m, 2H), 0.55 – 0.40 (m, 10H). ESI-MS *m/z* [(**pbib**)Ir(**pmpMe<sub>3</sub>Bz**)CN+H]<sup>+</sup> calcd for C<sub>43</sub>H<sub>46</sub>IrN<sub>8</sub> 867.3475, C 59.06; H 5.31; N 13.12, found 867.3477, C 57.52; H 5.36; N 13.51.

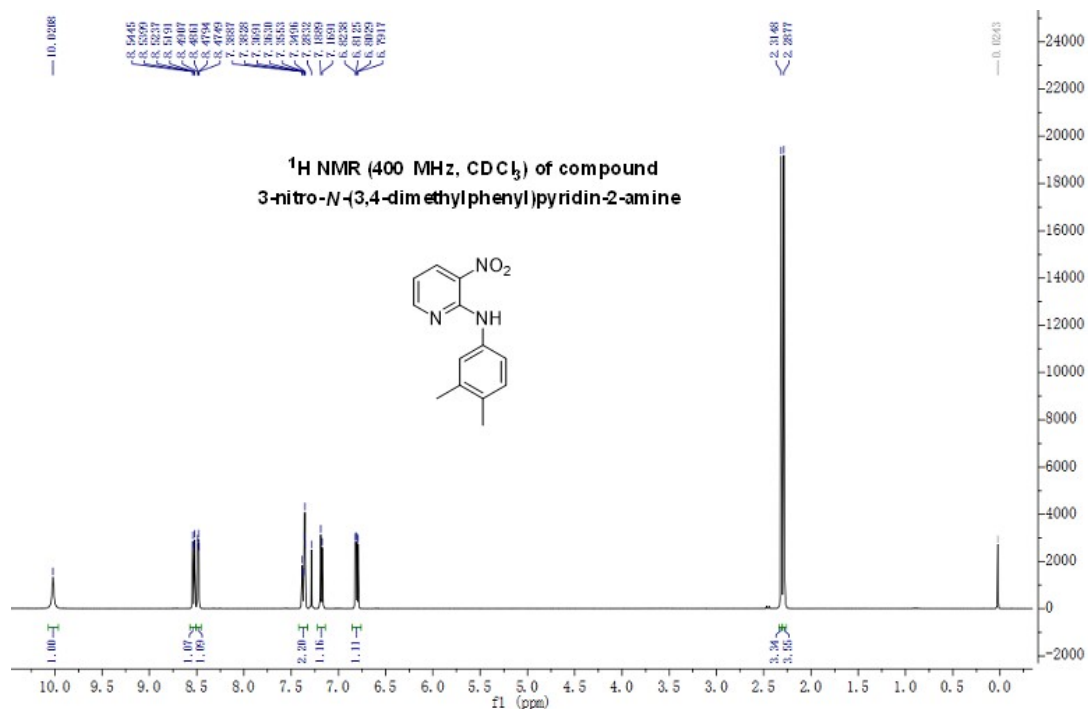

**Figure S1.** <sup>1</sup>H NMR (400MHz, CDCl<sub>3</sub>) of compound *N*-(3,4-dimethylphenyl)-3-nitropyridin-2-amine

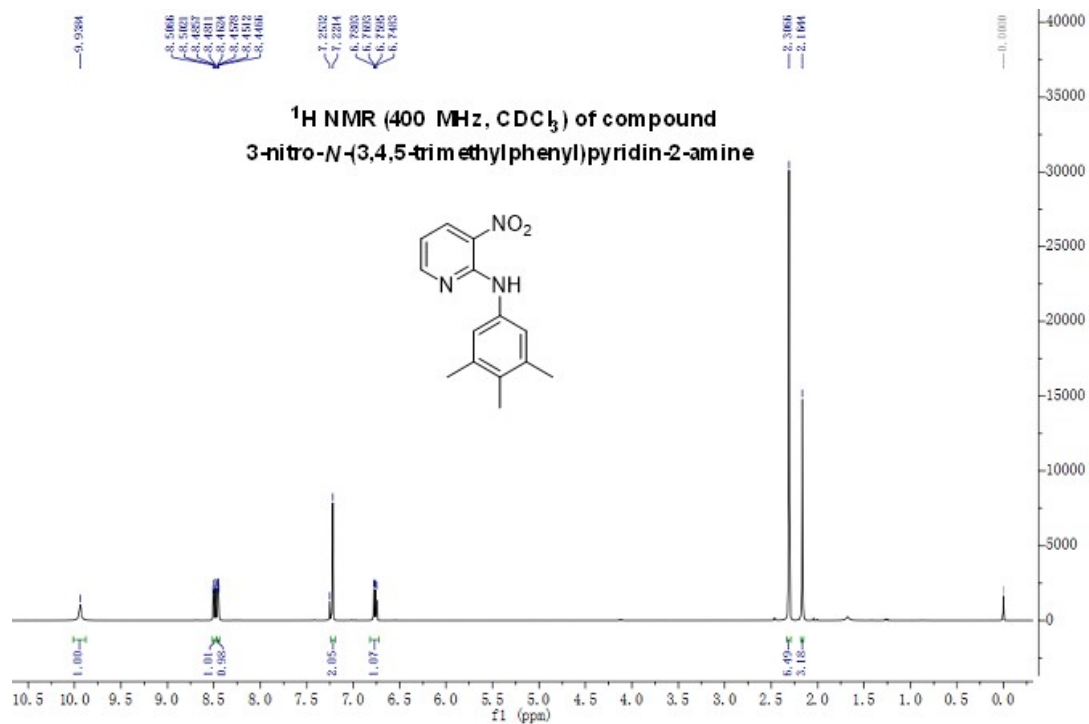

**Figure S2.** <sup>1</sup>H NMR (400MHz, CDCl<sub>3</sub>) of compound *N*-(3,4,5-trimethylphenyl)-3-nitropyridin-2-amine

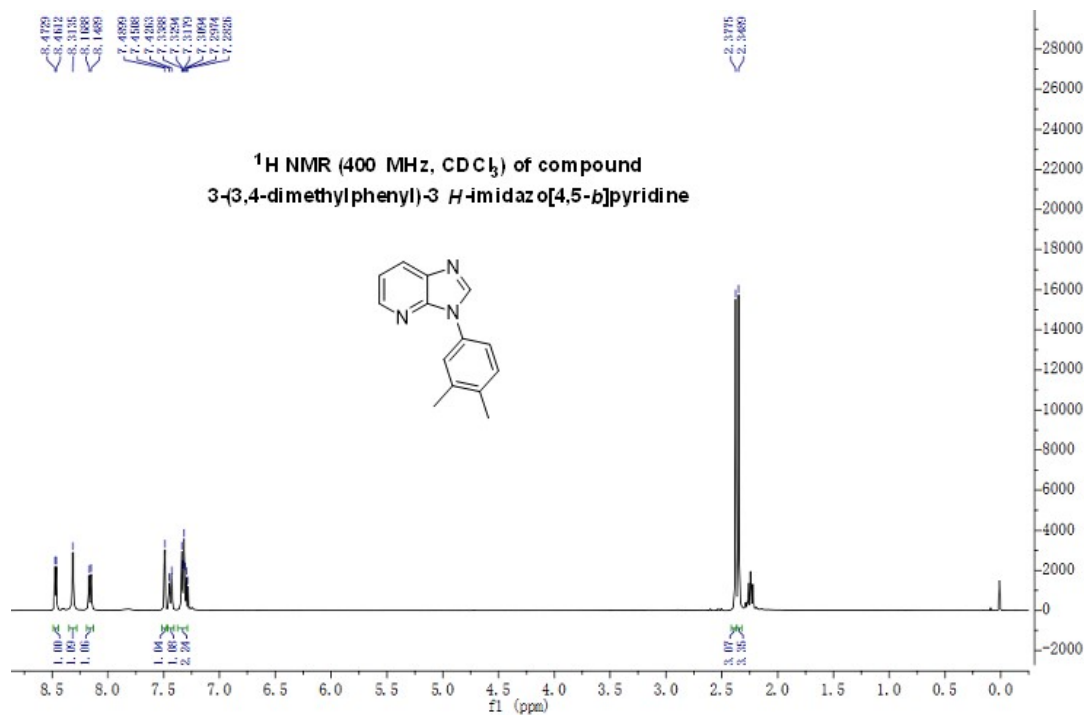

**Figure S3.** <sup>1</sup>H NMR (400MHz, CDCl<sub>3</sub>) of compound **3-(3,4-dimethylphenyl)-3H-imidazo[4,5-b]pyridine**

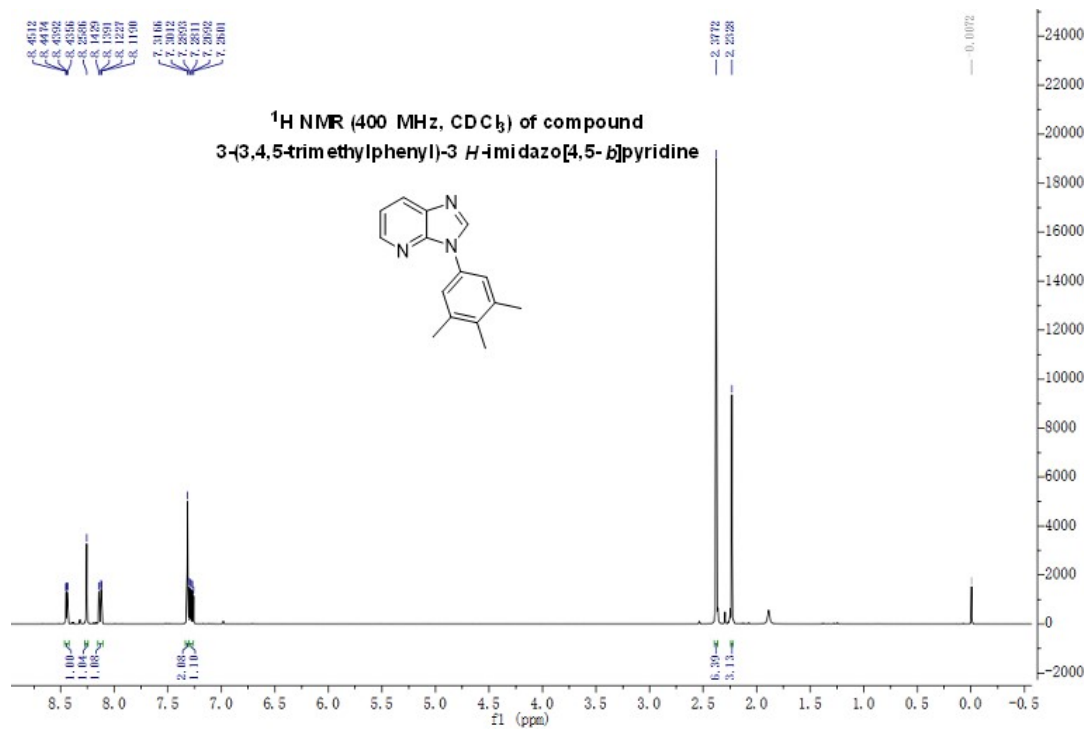

**Figure S4.** <sup>1</sup>H NMR (400MHz, CDCl<sub>3</sub>) of compound **3-(3,4,5-trimethylphenyl)-3H-imidazo[4,5-b]pyridine**

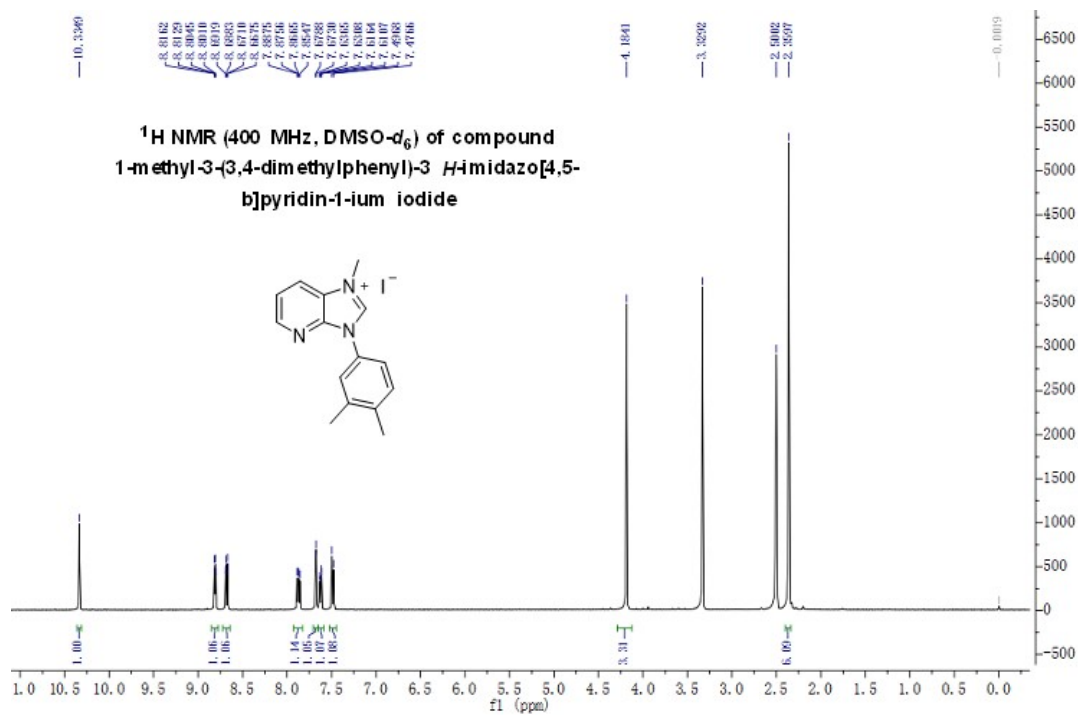

Figure S5. <sup>1</sup>H NMR (400MHz, CDCl<sub>3</sub>) of compound *pmpMe*<sub>2</sub>

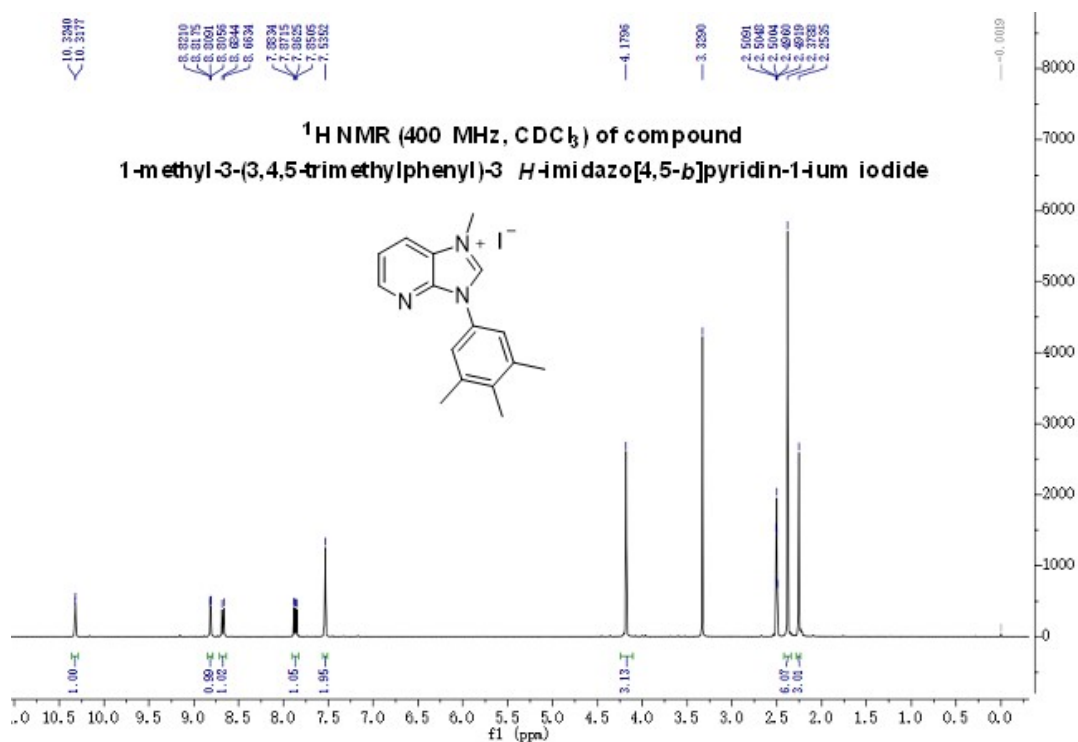

Figure S6. <sup>1</sup>H NMR (400MHz, CDCl<sub>3</sub>) of compound *pmpMe*<sub>3</sub>



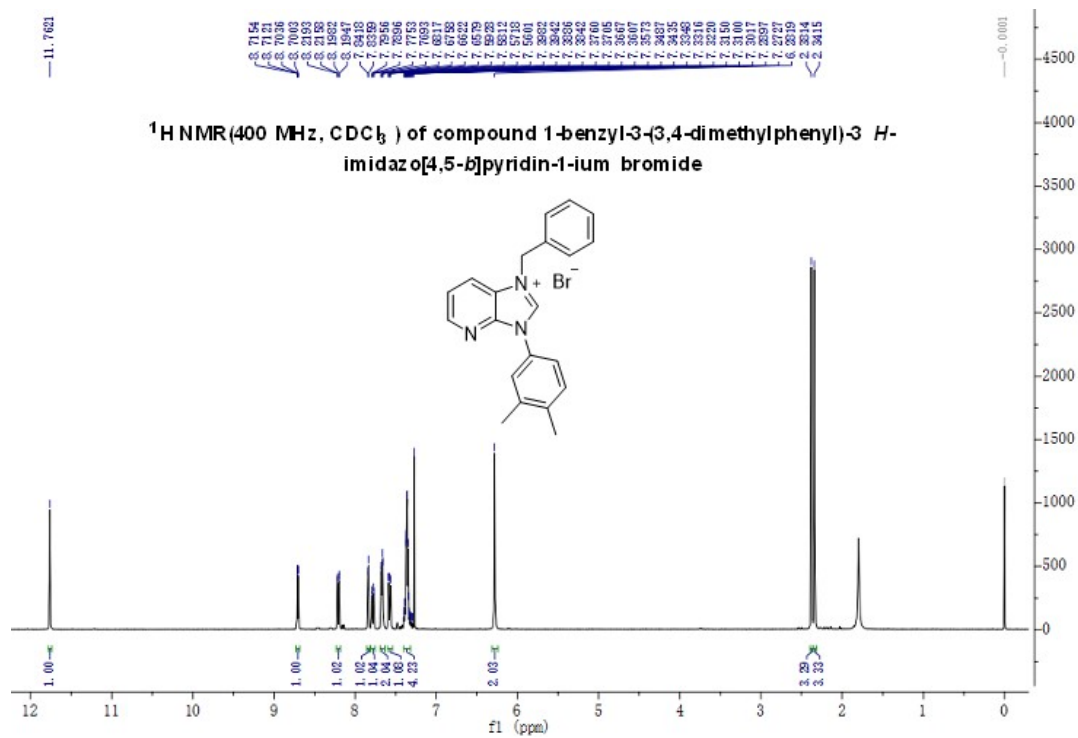

Figure S7.  $^1\text{H NMR}$  (400MHz,  $\text{CDCl}_3$ ) of compound *pmpMe<sub>2</sub>Bz*

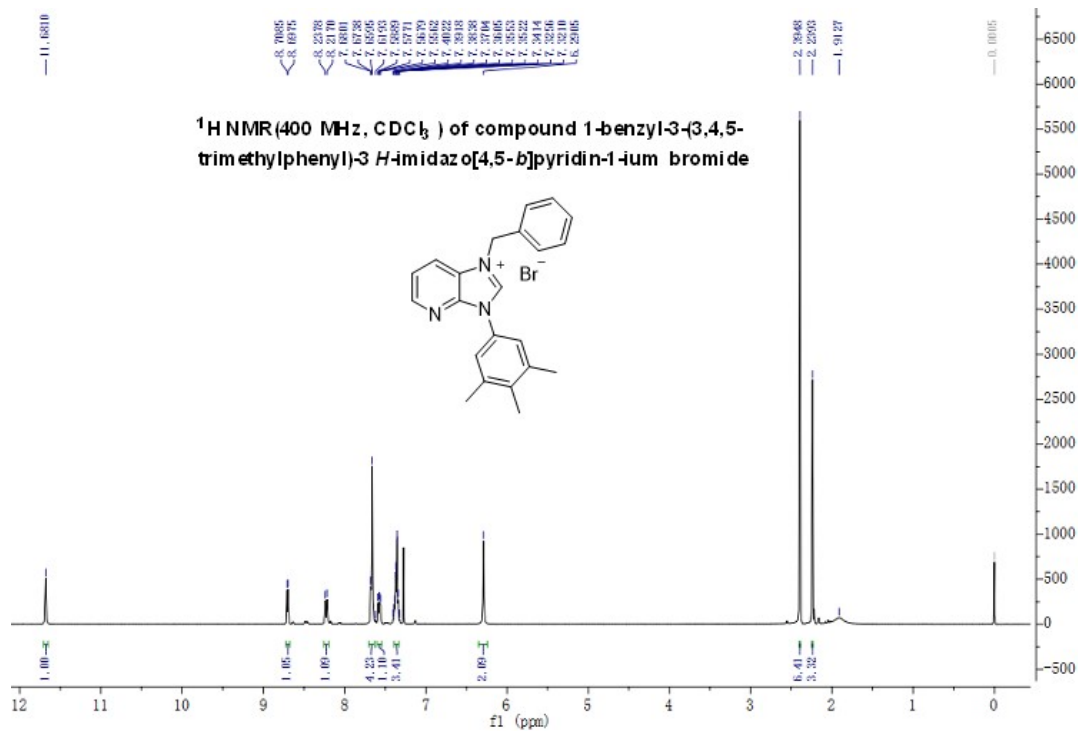

Figure S8.  $^1\text{H NMR}$  (400MHz,  $\text{CDCl}_3$ ) of compound *pmpMe<sub>3</sub>Bz*



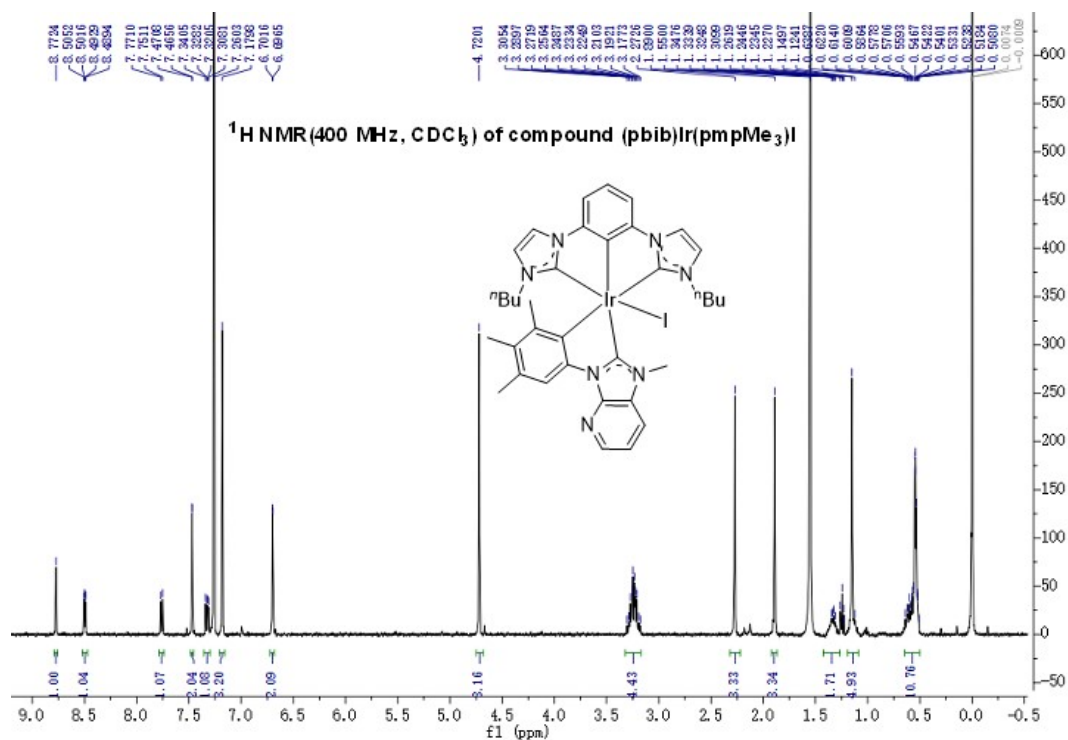

Figure S11. <sup>1</sup>H NMR (400MHz, CDCl<sub>3</sub>) of compound [(pbib)Ir(pmpMe<sub>3</sub>)I]

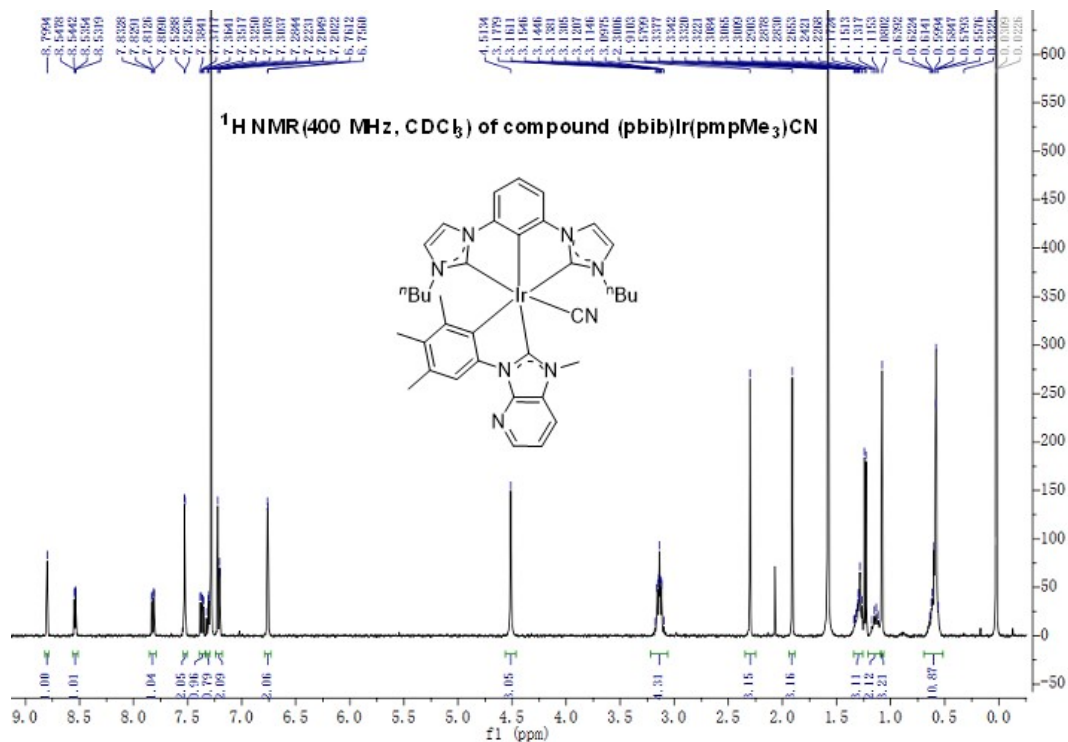

Figure S12. <sup>1</sup>H NMR (400MHz, CDCl<sub>3</sub>) of compound [(pbib)Ir(pmpMe<sub>3</sub>)CN]

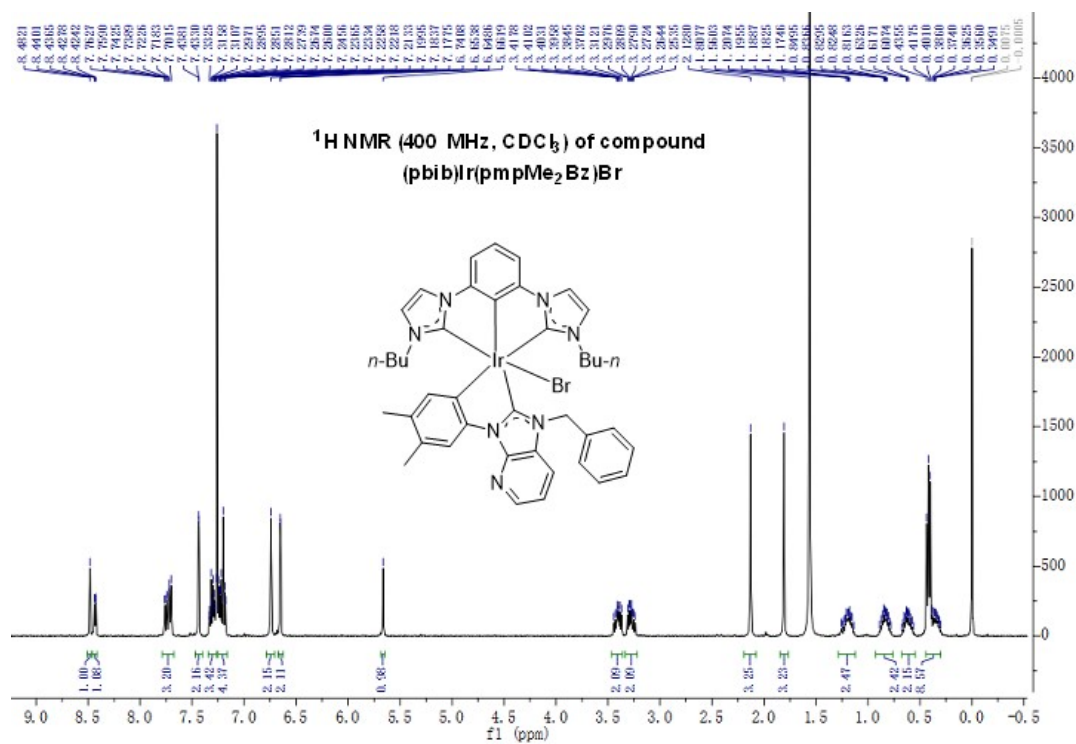

Figure S13. <sup>1</sup>H NMR (400MHz, CDCl<sub>3</sub>) of compound [(pbib)Ir(pmpMe<sub>2</sub>Bz)Br]

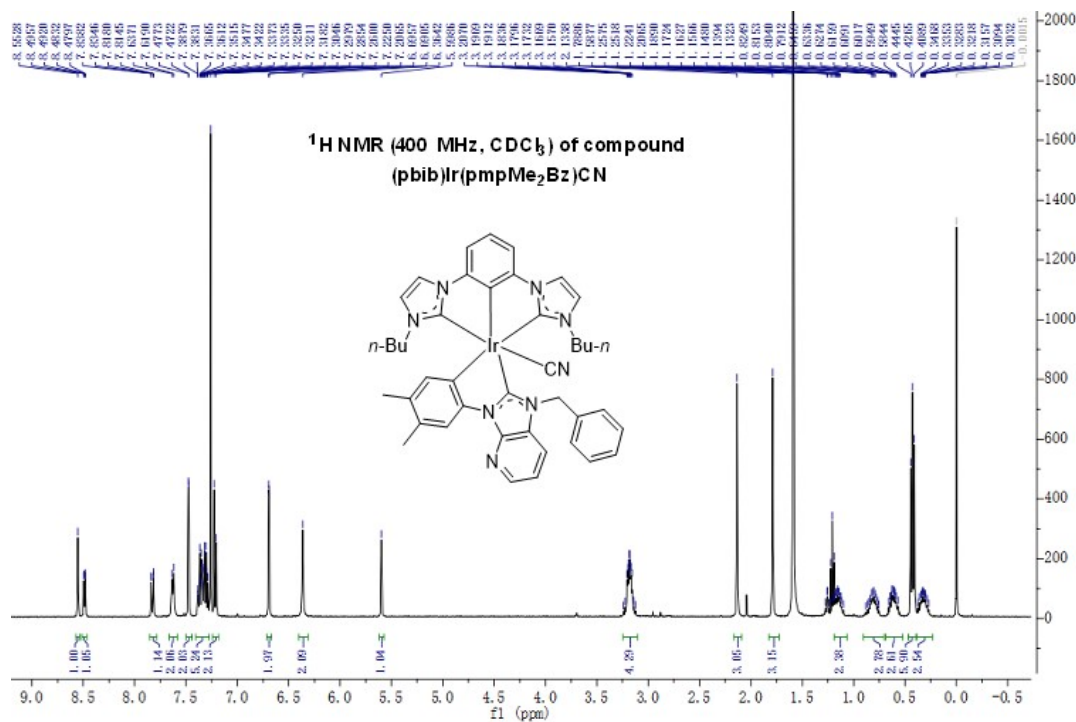

Figure S14. <sup>1</sup>H NMR (400MHz, CDCl<sub>3</sub>) of compound [(pbib)Ir(pmpMe<sub>2</sub>Bz)CN]



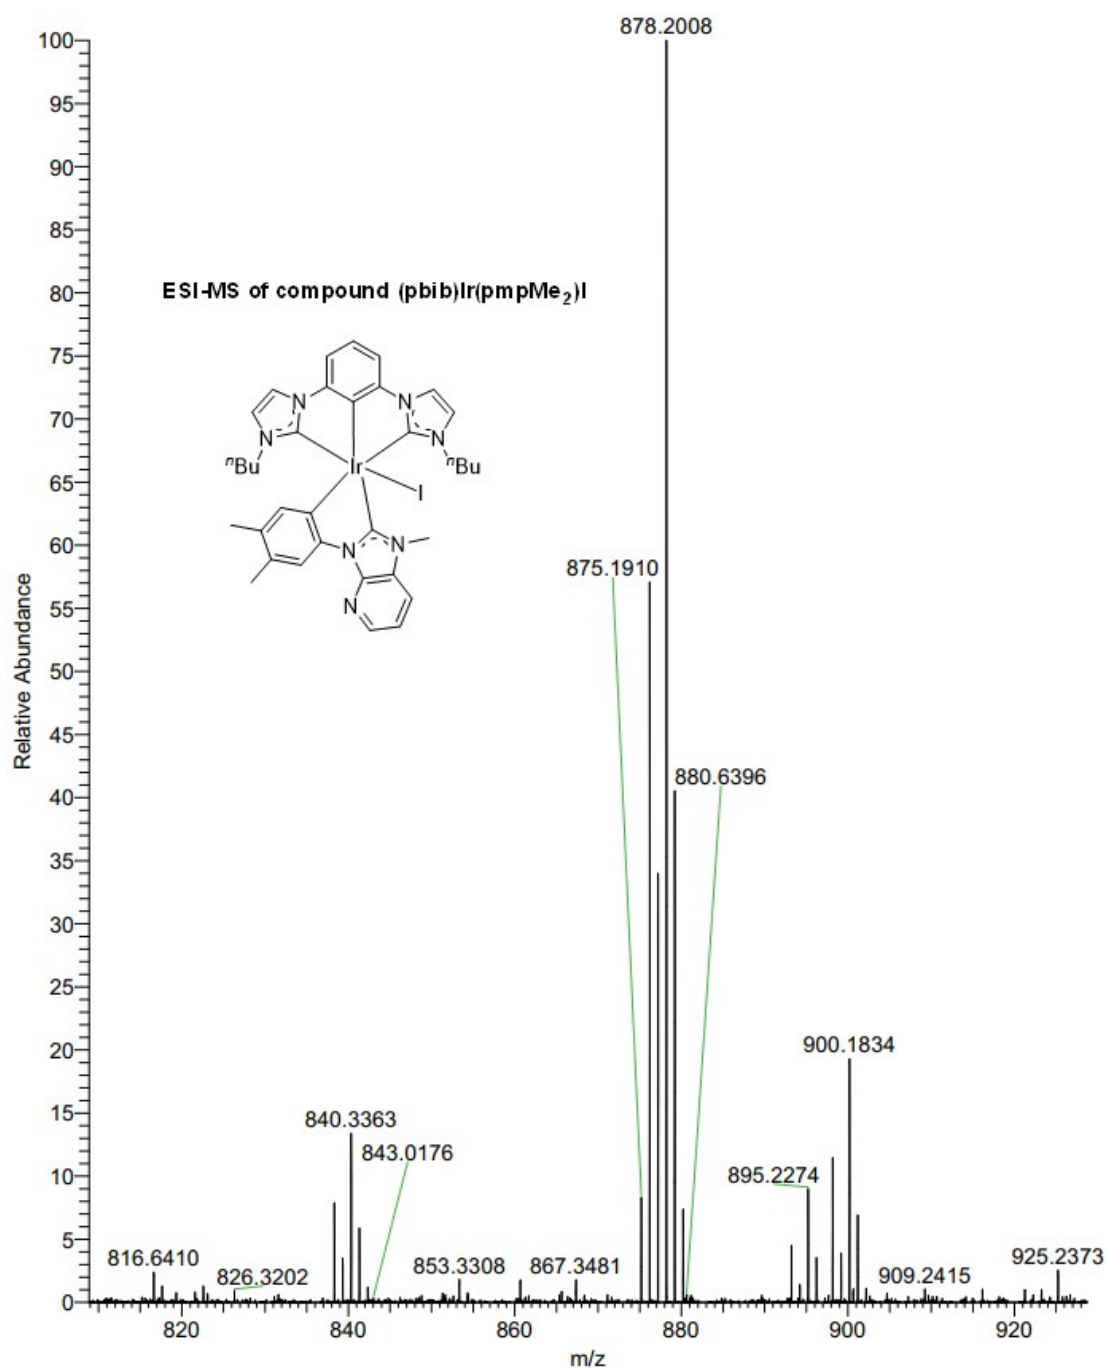

Figure S17. ESI-MS of compound [(pbib)Ir(pmpMe<sub>2</sub>)I]



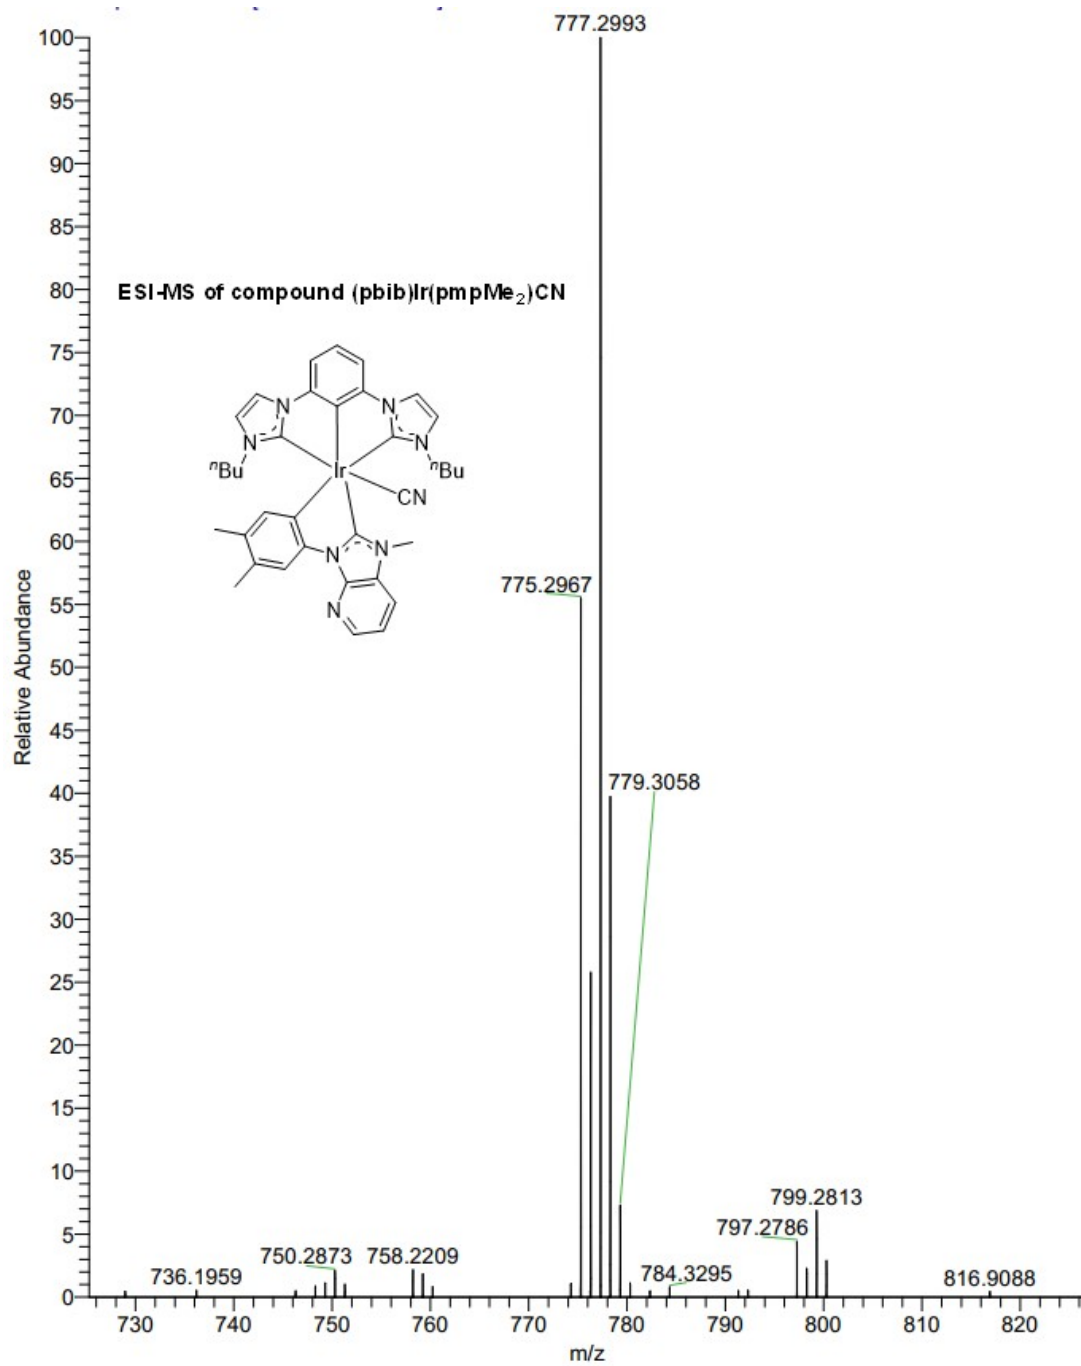

Figure S18. ESI-MS of compound  $[(pbib)Ir(pmpMe_2)CN]$

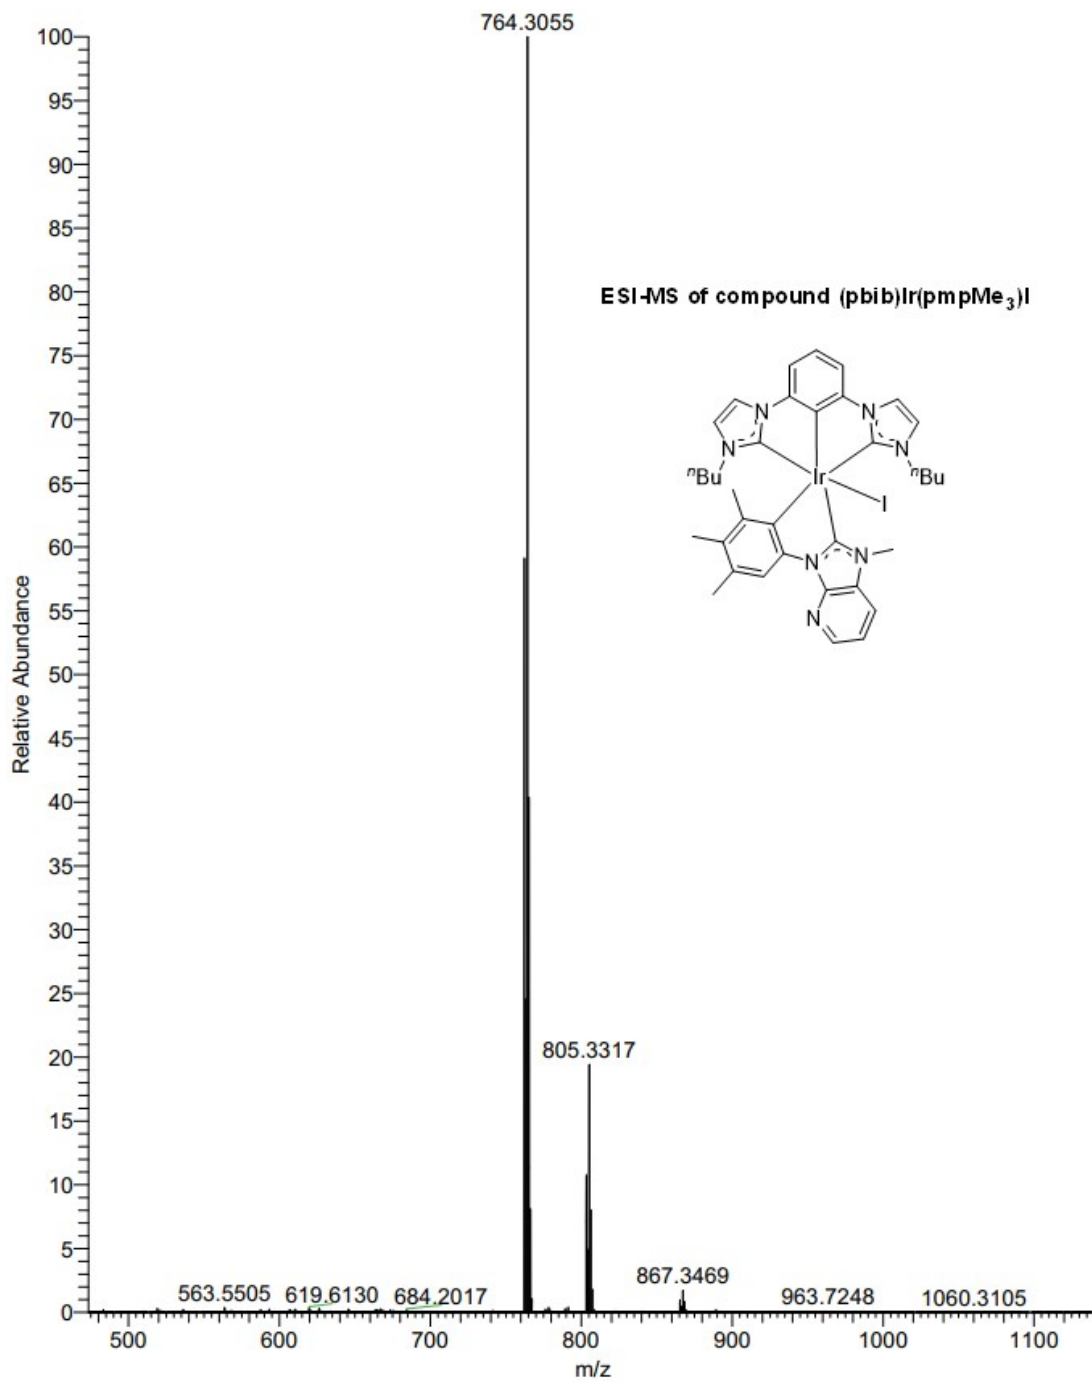

Figure S19. ESI-MS of compound [(pbib)Ir(pmpMe<sub>3</sub>)I]



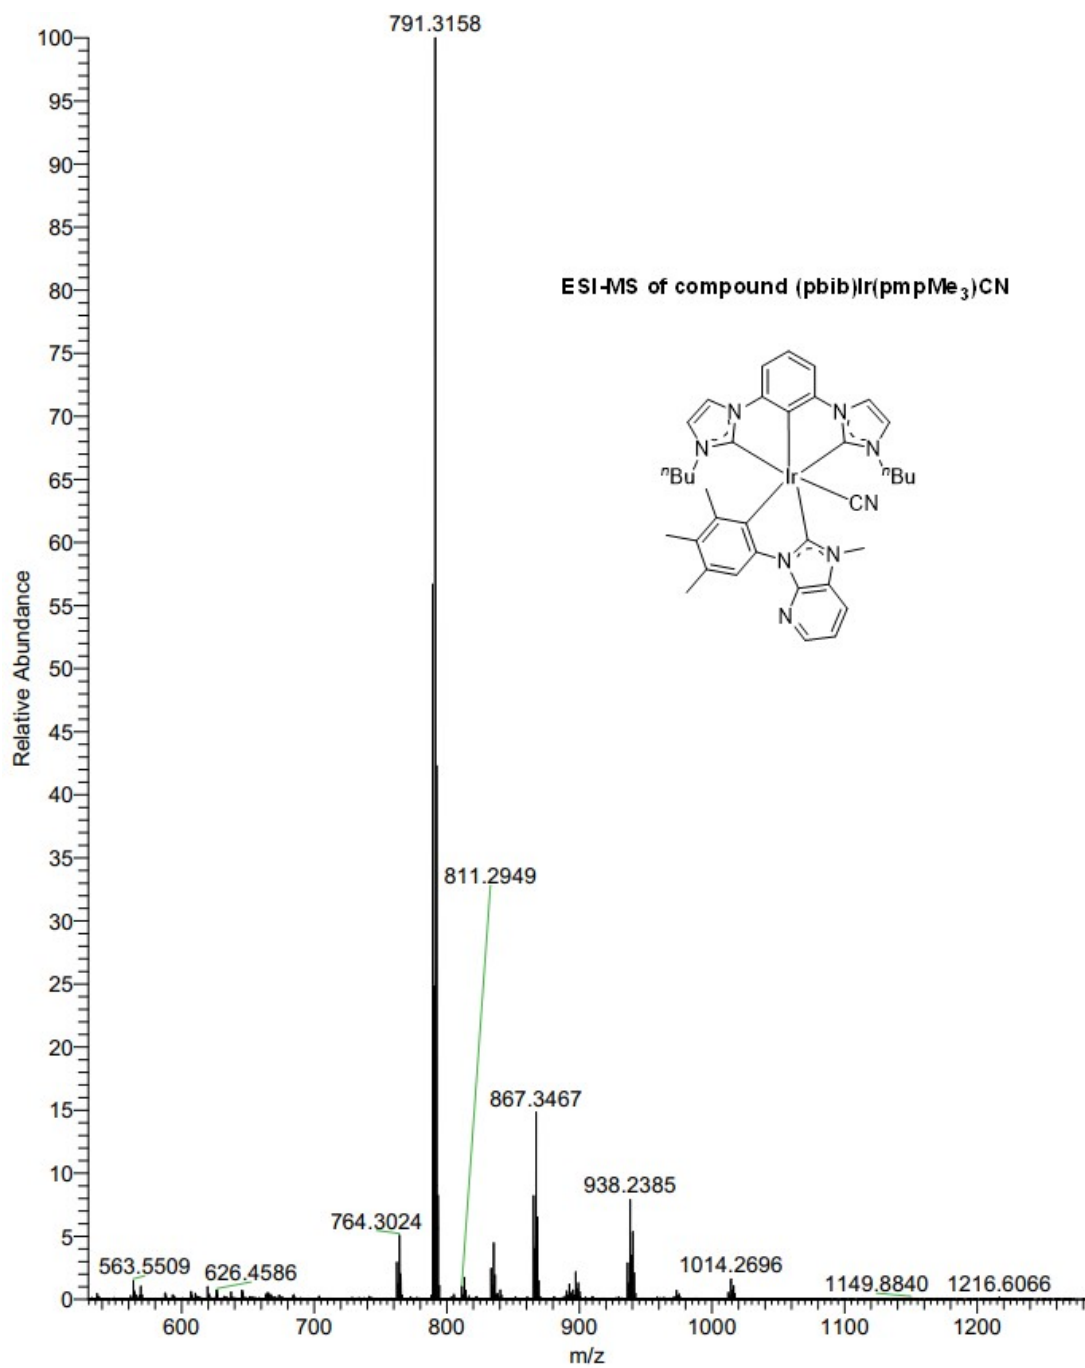

Figure S20. ESI-MS of compound [(pbib)Ir(pmpMe<sub>3</sub>)CN]

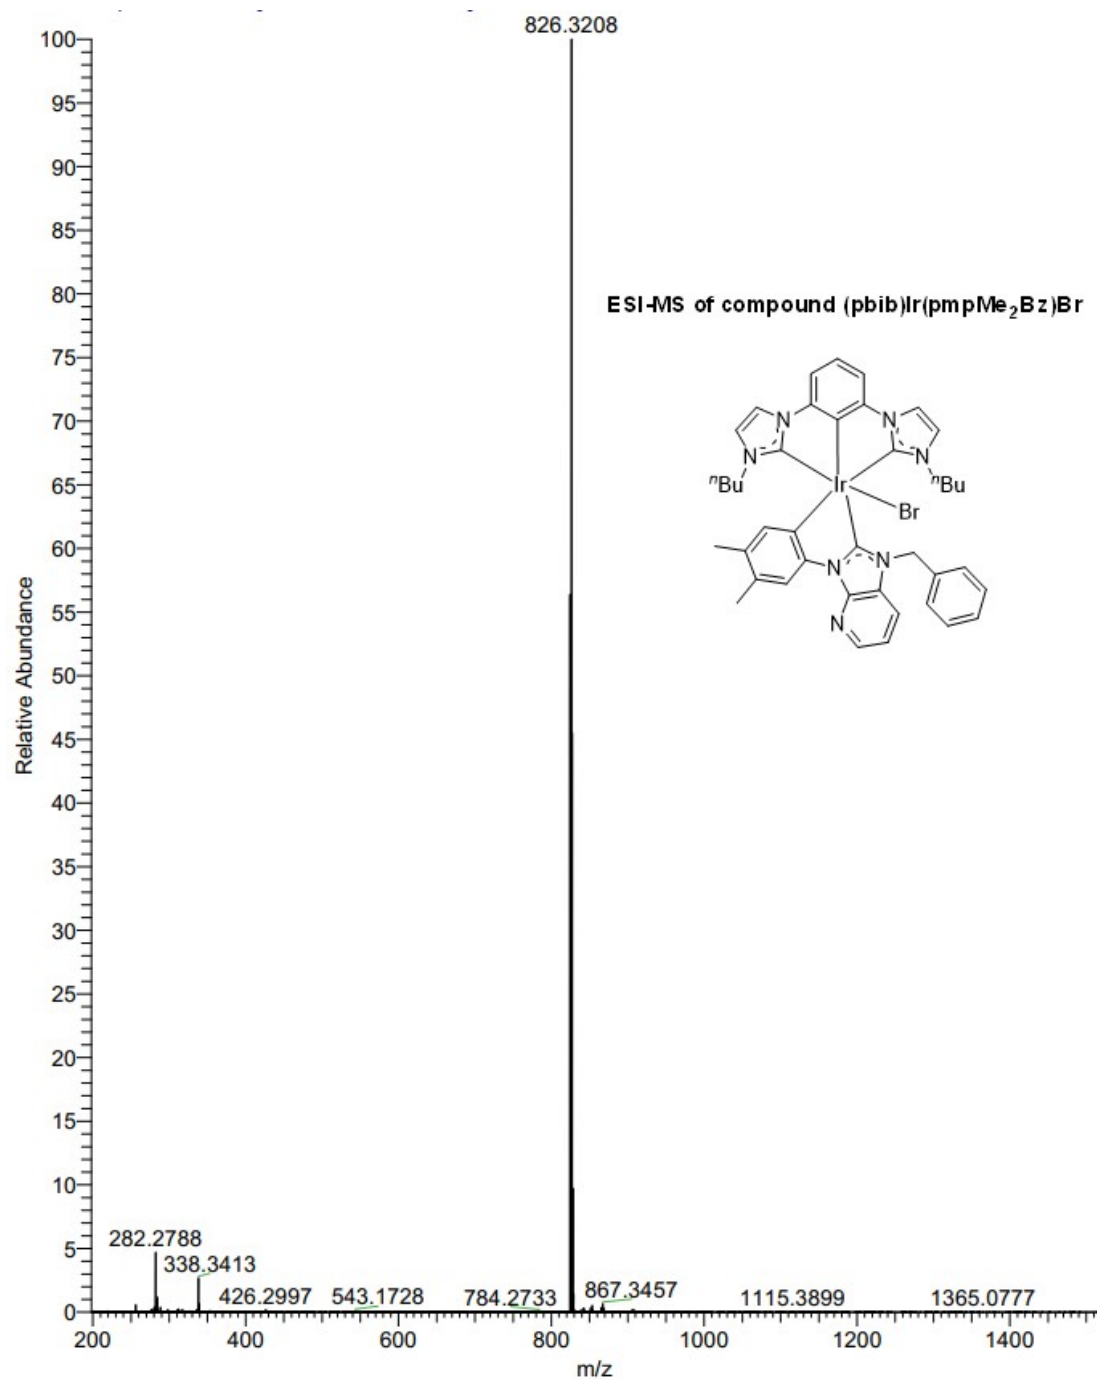

Figure S21. ESI-MS of compound [(pbib)Ir(pmpMe<sub>2</sub>Bz)Br]

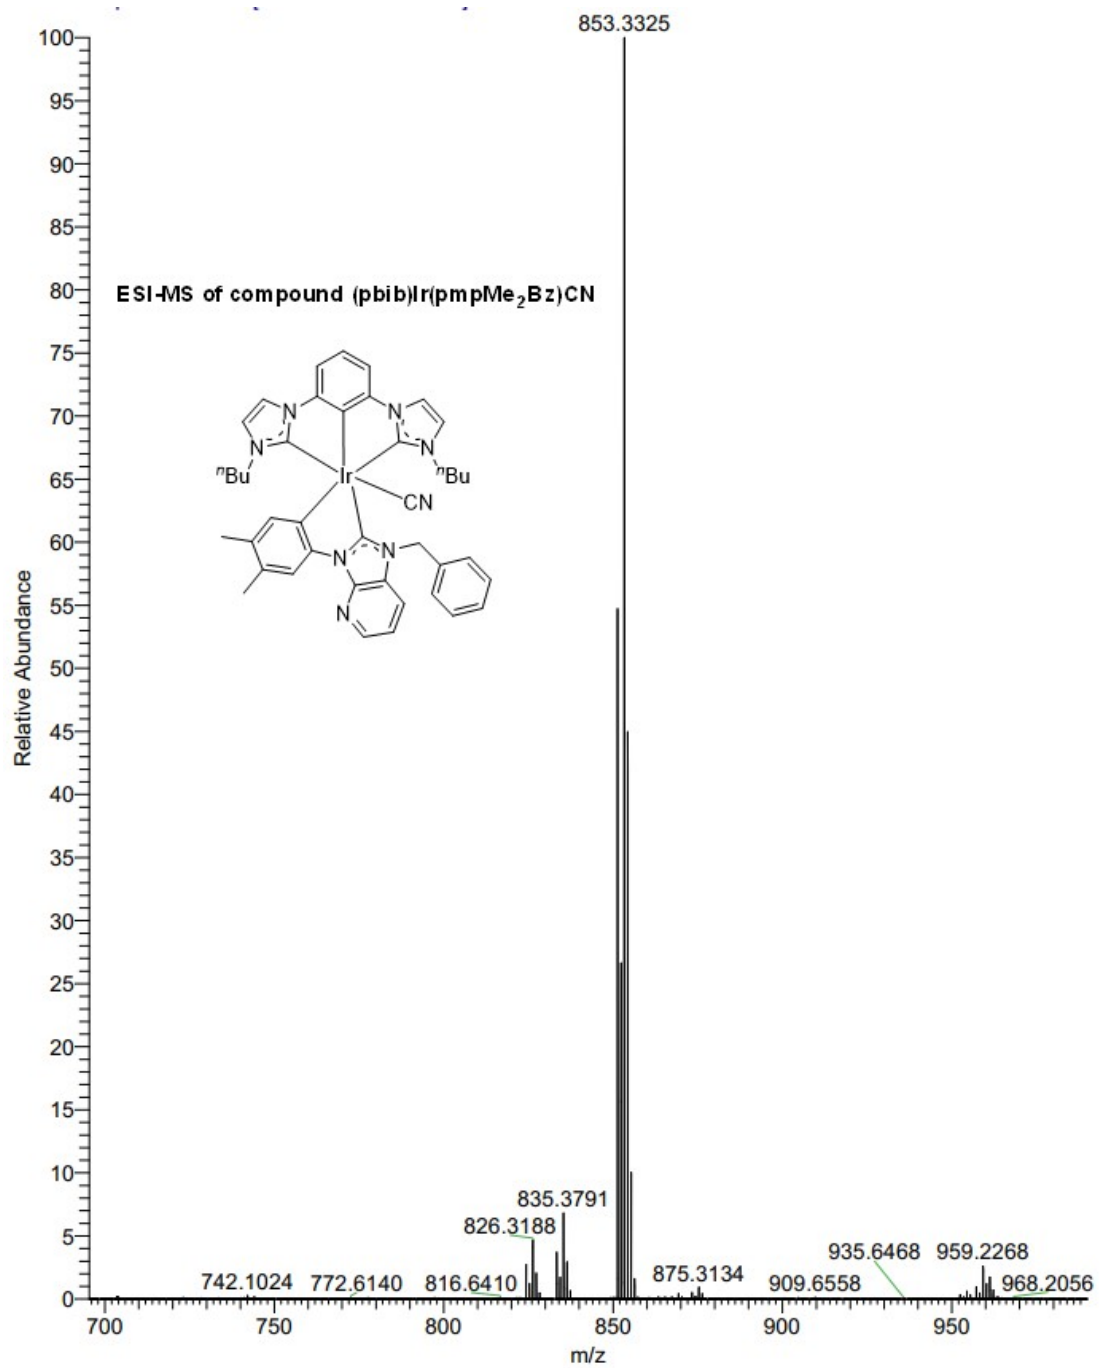

Figure S22. ESI-MS of compound [(pbib)Ir(pmpMe<sub>2</sub>Bz)CN]

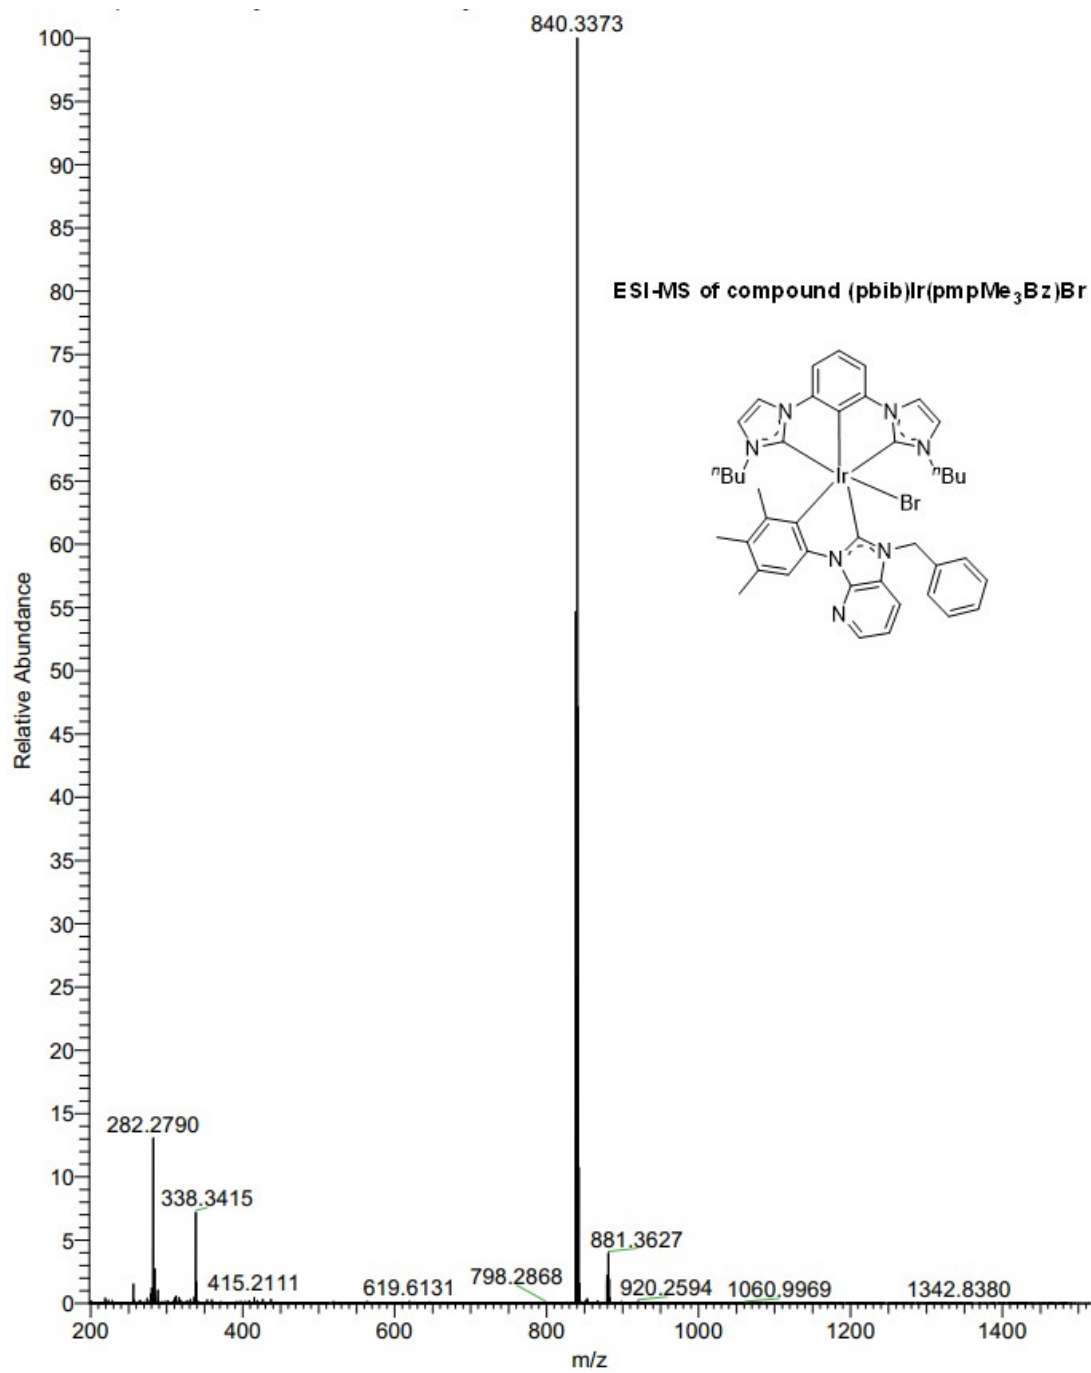

Figure S23. ESI-MS of compound [(pbib)Ir(pmpMe<sub>3</sub>Bz)Br]

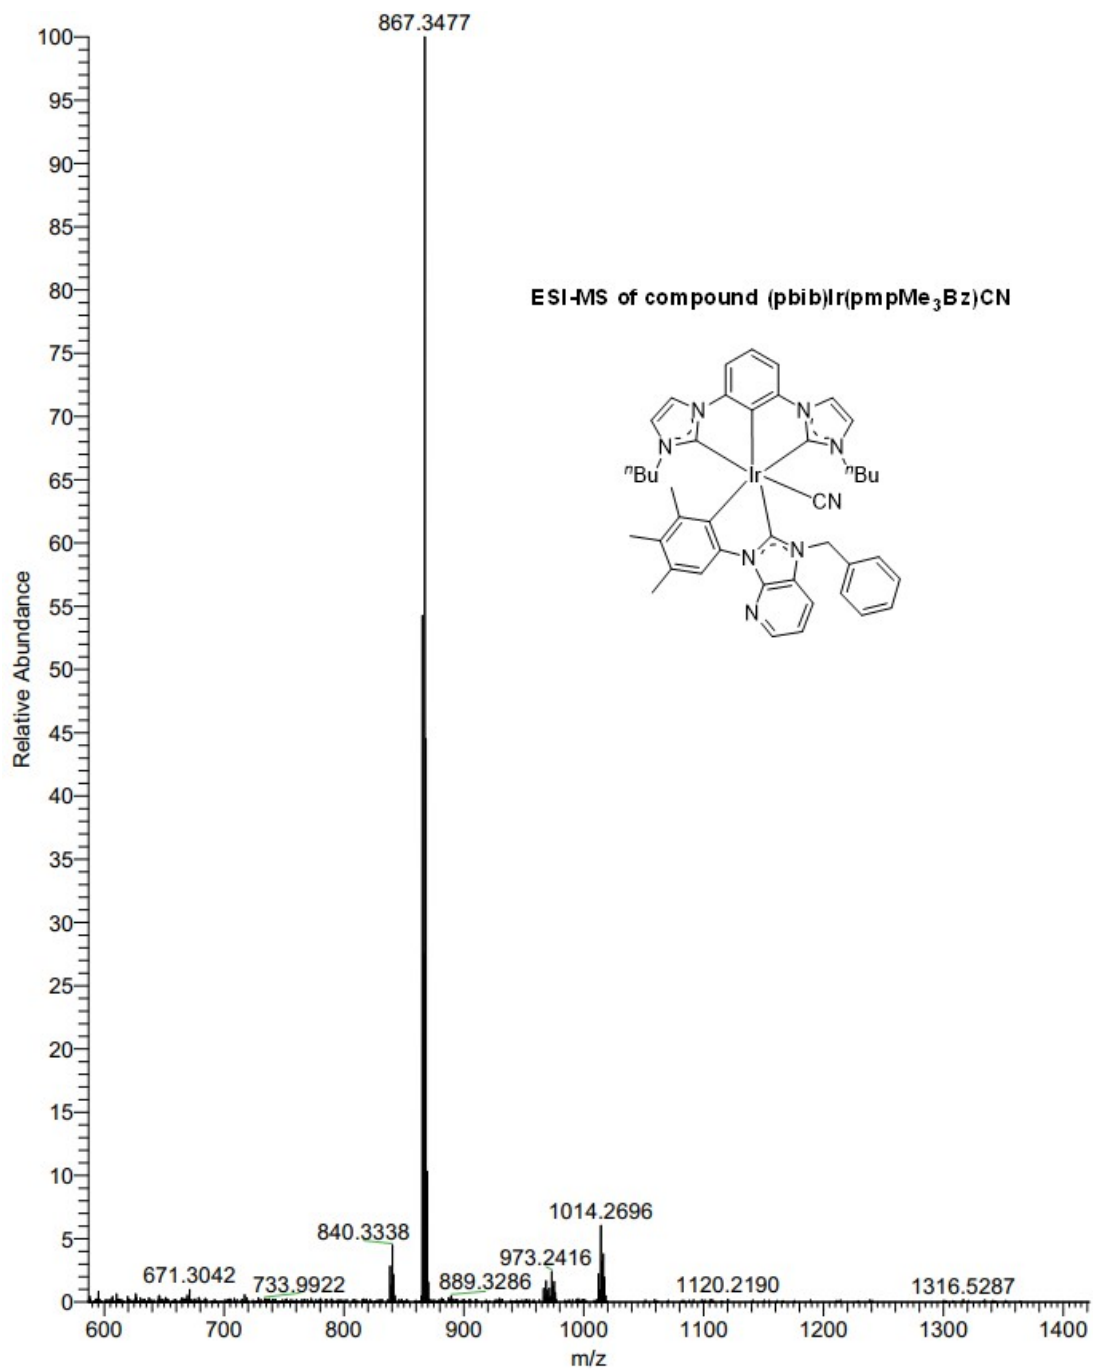

Figure S24. ESI-MS of compound [(pbib)Ir(pmpMe<sub>3</sub>Bz)CN]

Data File D:\DATA\DAVID\2022-08-17\PMPE2-CN.D  
Sample Name: pmpMe2-CN

```
=====
Acq. Operator   : SYSTEM                      Seq. Line :    1
Acq. Instrument : 1260 DAD+ELSD              Location  : Vial 6
Injection Date  : 8/17/2022 1:54:06 PM      Inj       :    1
                                           Inj Volume: 10.000 µl
Different Inj Volume from Sample Entry! Actual Inj Volume : 5.000 µl
Acq. Method     : D:\DATA\DAVID\2022-08-17\DAVID-20210927.M
Last changed    : 8/17/2022 1:57:47 PM by SYSTEM
                 (modified after loading)
Analysis Method : D:\DATA\DAVID\2022-08-17\DAVID-20210927.M (Sequence Method)
Last changed    : 8/17/2022 1:53:17 PM by SYSTEM
=====
```

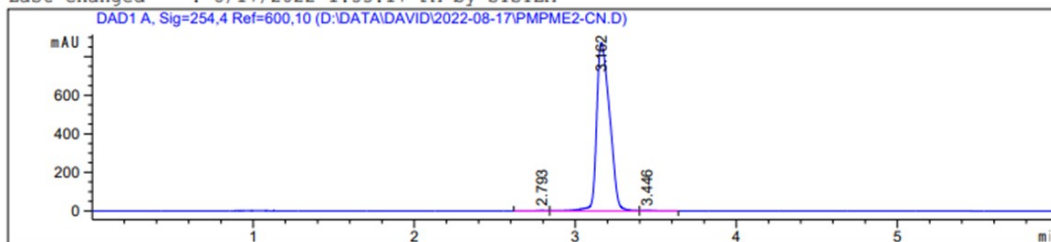

=====  
Area Percent Report  
=====

```
Sorted By      :      Signal
Multiplier     :      1.0000
Dilution       :      1.0000
Use Multiplier & Dilution Factor with ISTDs
```

Signal 1: DAD1 A, Sig=254,4 Ref=600,10

| Peak # | RetTime [min] | Type | Width [min] | Area [mAU*s] | Height [mAU] | Area %  |
|--------|---------------|------|-------------|--------------|--------------|---------|
| 1      | 2.793         | BV   | 0.0630      | 8.71559      | 1.91787      | 0.1775  |
| 2      | 3.162         | VV   | 0.0959      | 4887.47412   | 872.47058    | 99.5575 |
| 3      | 3.446         | VB   | 0.0617      | 13.00834     | 2.67865      | 0.2650  |

Totals :                    4909.19805  877.06710

=====  
\*\*\* End of Report \*\*\*

**Figure S25.** The purity analysis by HPLC for [(pbib)Ir(pmpMe<sub>2</sub>)CN]

Data File D:\DATA\DAVID\2022-08-17\PMPE3-CN.D  
 Sample Name: pmpMe3-CN

```

=====
Acq. Operator   : SYSTEM                      Seq. Line :    2
Acq. Instrument : 1260 DAD+ELSD              Location  : Vial 7
Injection Date  : 8/17/2022 2:01:01 PM      Inj       :    1
                                           Inj Volume: 10.000 µl
Different Inj Volume from Sample Entry! Actual Inj Volume : 5.000 µl
Acq. Method     : D:\DATA\DAVID\2022-08-17\DAVID-20210927.M
Last changed    : 8/17/2022 1:57:47 PM by SYSTEM
Analysis Method : D:\DATA\DAVID\2022-08-17\DAVID-20210927.M (Sequence Method)
Last changed    : 8/17/2022 1:53:17 PM by SYSTEM
  
```

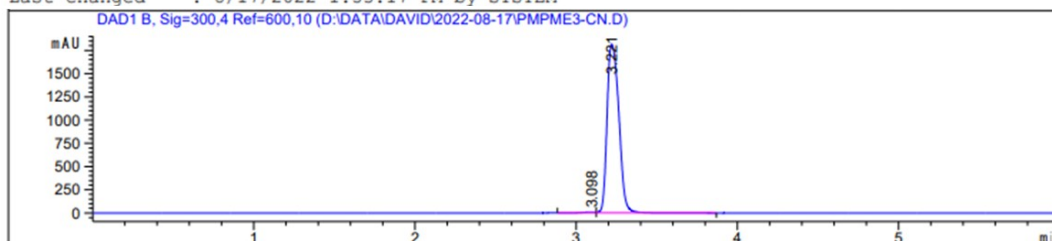

Area Percent Report

```

Sorted By      :      Signal
Multiplier     :      1.0000
Dilution       :      1.0000
Use Multiplier & Dilution Factor with ISTDs
  
```

Signal 1: DAD1 A, Sig=254,4 Ref=600,10

| Peak # | RetTime [min] | Type | Width [min] | Area [mAU*s] | Height [mAU] | Area %  |
|--------|---------------|------|-------------|--------------|--------------|---------|
| 1      | 3.098         | BV   | 0.0828      | 53.13431     | 8.75760      | 0.5728  |
| 2      | 3.221         | VB   | 0.0828      | 9223.09863   | 1814.93591   | 99.4272 |

Totals :                    9276.23294 1823.69351

\*\*\* End of Report \*\*\*

**Figure S26.** The purity analysis by HPLC for [(pbib)Ir(pmpMe<sub>3</sub>)CN]

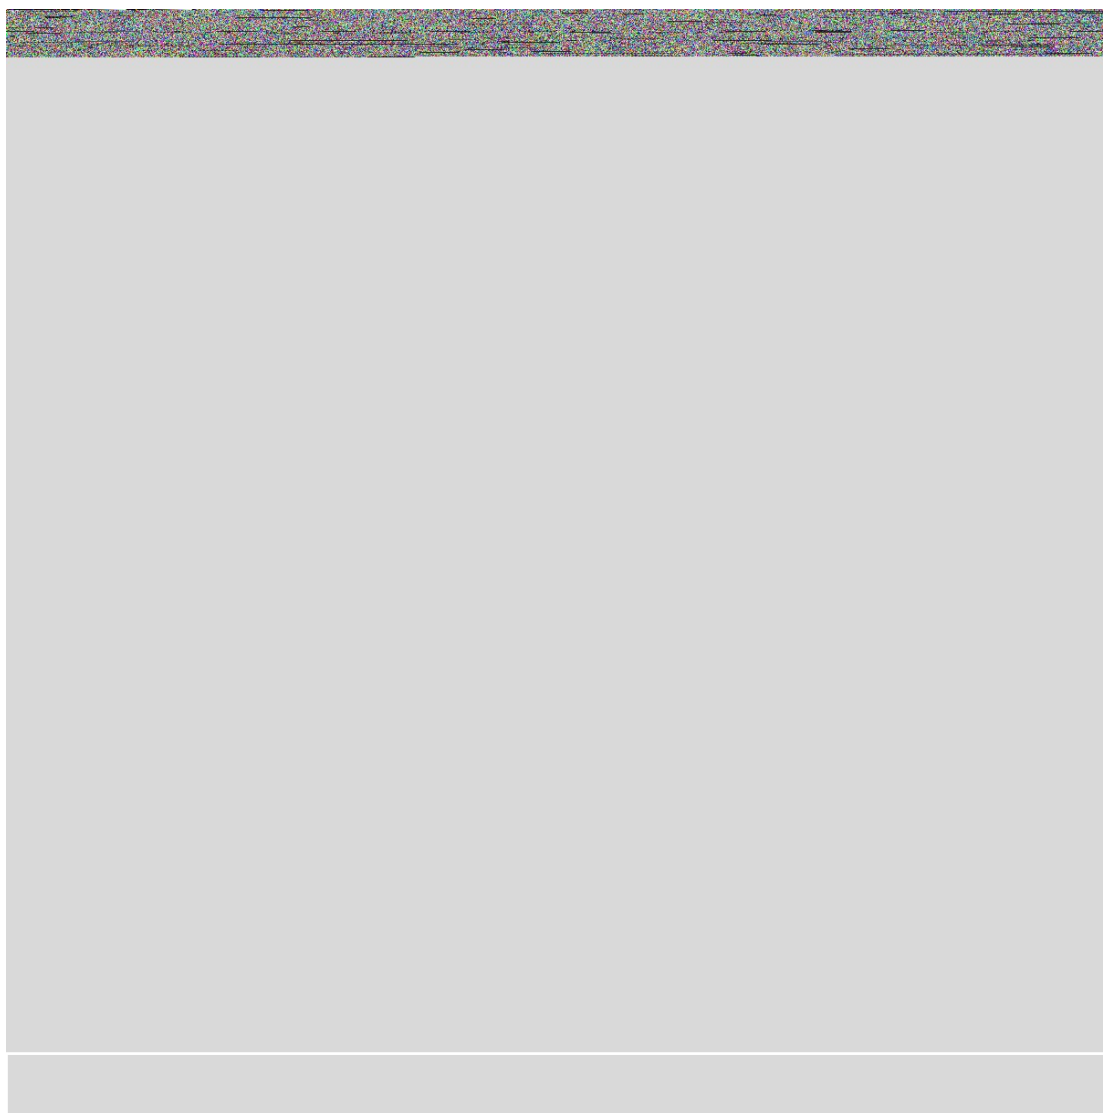

**Figure S27.** The purity analysis by HPLC for [(pbib)Ir(pmpMe<sub>2</sub>Bz)CN]



Data File D:\DATA\DAVID\2022-08-17\PMPE3BZ-CN.D  
Sample Name: pmpMe3Bz-CN

```
=====
Acq. Operator   : SYSTEM                      Seq. Line :    4
Acq. Instrument : 1260 DAD+ELSD              Location  : Vial 9
Injection Date  : 8/17/2022 2:14:49 PM      Inj       :    1
                                           Inj Volume: 10.000 µl
Different Inj Volume from Sample Entry! Actual Inj Volume : 5.000 µl
Acq. Method    : D:\DATA\DAVID\2022-08-17\DAVID-20210927.M
Last changed   : 8/17/2022 1:57:47 PM by SYSTEM
Analysis Method: D:\DATA\DAVID\2022-08-17\DAVID-20210927.M (Sequence Method)
Last changed   : 8/17/2022 1:53:17 PM by SYSTEM
=====
```

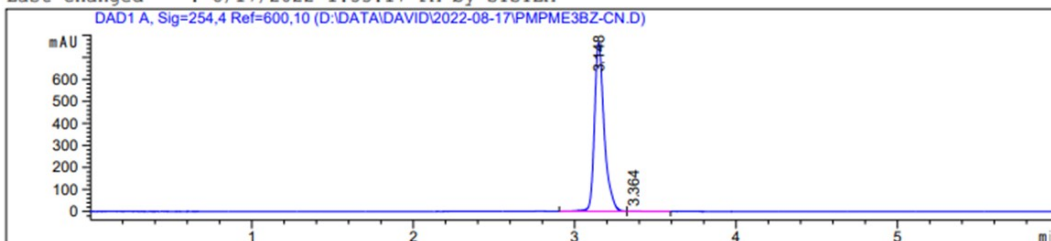

=====  
Area Percent Report  
=====

```
Sorted By      : Signal
Multiplier     : 1.0000
Dilution       : 1.0000
Use Multiplier & Dilution Factor with ISTDs
```

Signal 1: DAD1 A, Sig=254,4 Ref=600,10

| Peak # | RetTime [min] | Type | Width [min] | Area [mAU*s] | Height [mAU] | Area %  |
|--------|---------------|------|-------------|--------------|--------------|---------|
| 1      | 3.148         | BV   | 0.0628      | 3202.55469   | 766.21381    | 99.7321 |
| 2      | 3.364         | VB   | 0.0613      | 8.60180      | 1.73595      | 0.2679  |

Totals :                    3211.15649  767.94975

=====  
\*\*\* End of Report \*\*\*

**Figure S28.** The purity analysis by HPLC for [(pbib)Ir(pmpMe<sub>3</sub>Bz)CN]

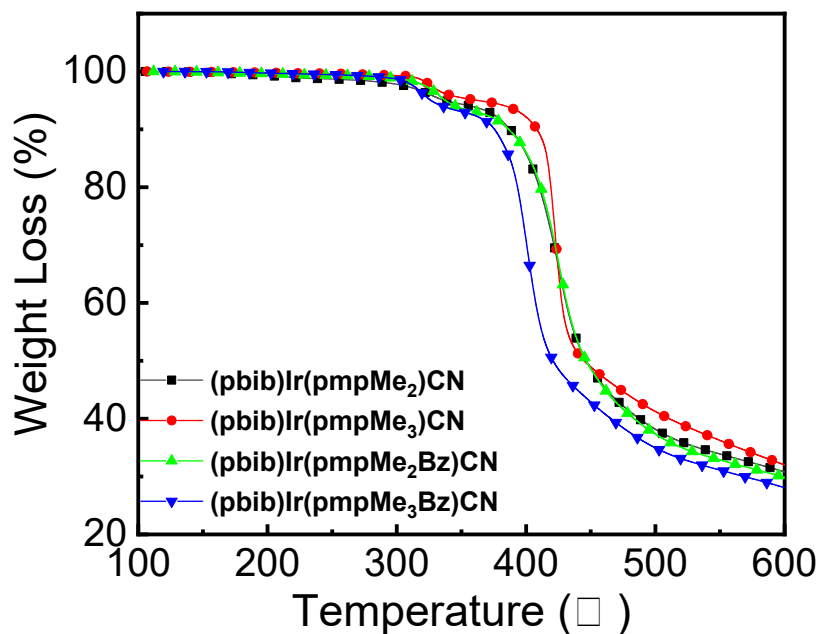

**Figure S29.** The thermogravimetric analysis (TGA) curves for the [3+2+1] coordinated iridium(III) complexes.

**Table S1.** Thermal properties of the [3+2+1] coordinated iridium(III) complexes.

| Complex                                  | $T_d^a/^\circ\text{C}$ |
|------------------------------------------|------------------------|
| <b>[(pbib)Ir(pmpMe<sub>2</sub>)CN]</b>   | 337                    |
| <b>[(pbib)Ir(pmpMe<sub>3</sub>)CN]</b>   | 363                    |
| <b>[(pbib)Ir(pmpMe<sub>2</sub>Bz)CN]</b> | 337                    |
| <b>[(pbib)Ir(pmpMe<sub>3</sub>Bz)CN]</b> | 326                    |

<sup>a</sup> Decomposition temperature ( $T_d$ ) is defined as the temperature at which the complex shows a 5 % weight loss.

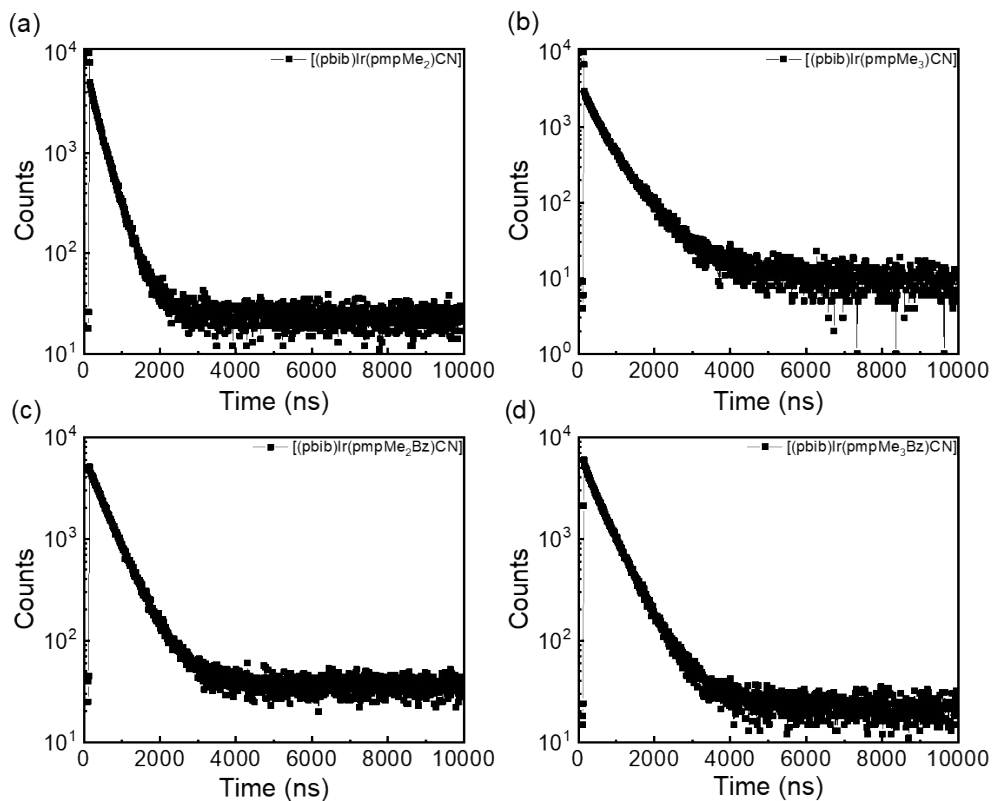

**Figure S30.** Time-resolved photoluminescence decay profiles of the [3+2+1] coordinated iridium(III) complexes in degassed toluene at 298 K.

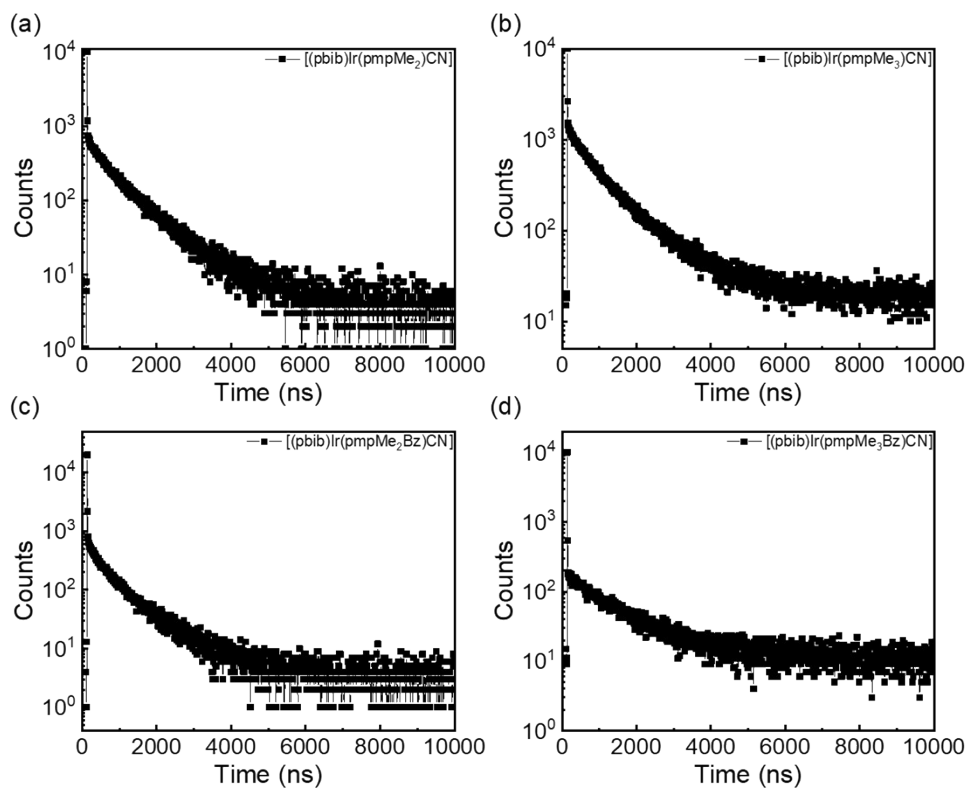

**Figure S31** Time-resolved photoluminescence decay profiles of 20 wt % iridium complexes doped into DPEPO at 298 K

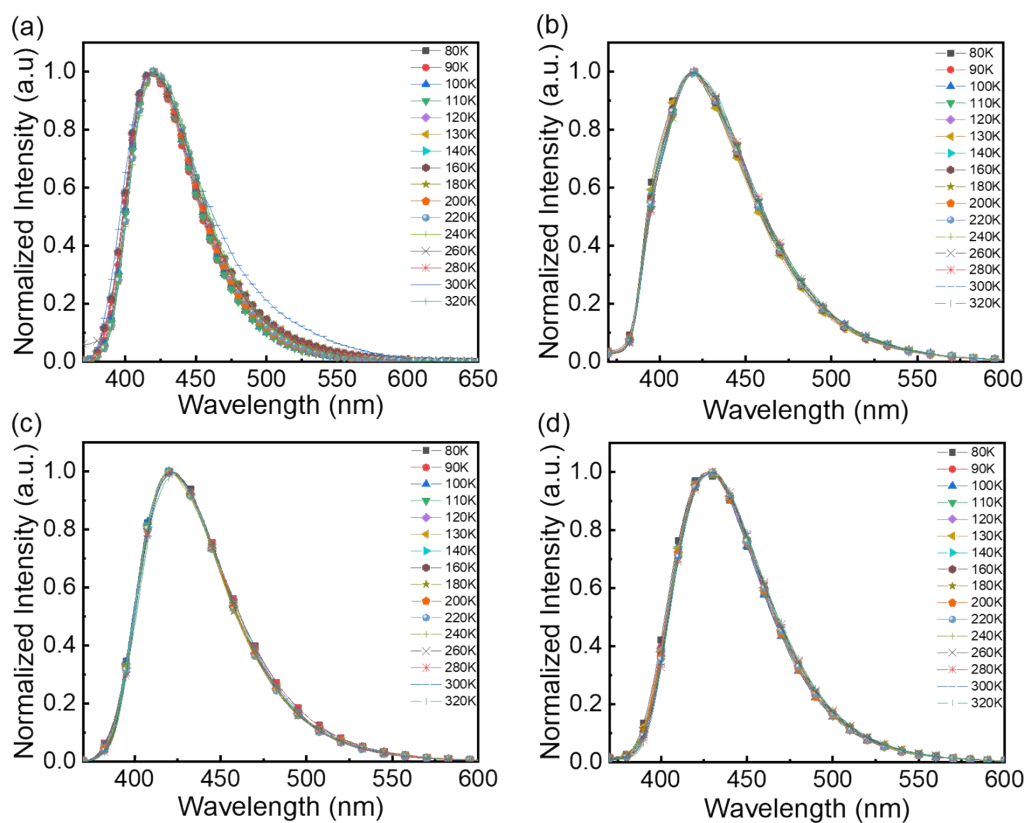

**Figure S32** Normalized emission spectra of (a)  $[(pbib)Ir(pmpMe_2)CN]$ , (b)  $[(pbib)Ir(pmpMe_3)CN]$ , (c)  $[(pbib)Ir(pmpMe_2Bz)CN]$ , (d)  $[(pbib)Ir(pmpMe_3Bz)CN]$ , in degassed toluene upon increasing temperature from 80 K to 320 K.

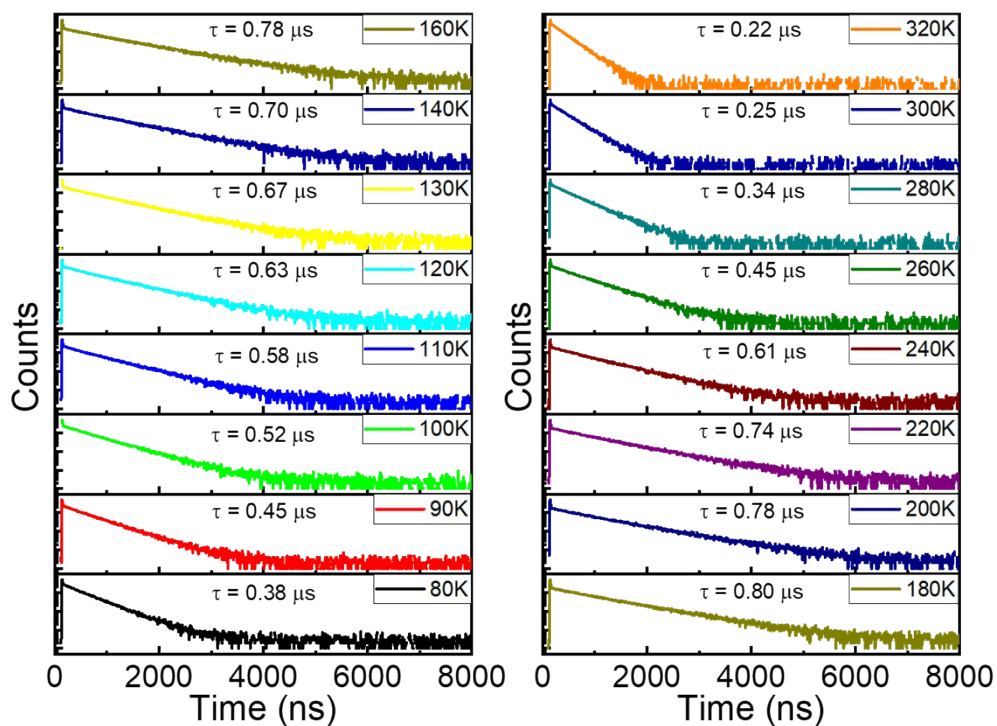

**Figure S33** Time-resolved photoluminescence decay profiles of [(pbib)Ir(pmpMe<sub>2</sub>)CN] in degassed toluene upon increasing temperature from 80 K to 320 K.

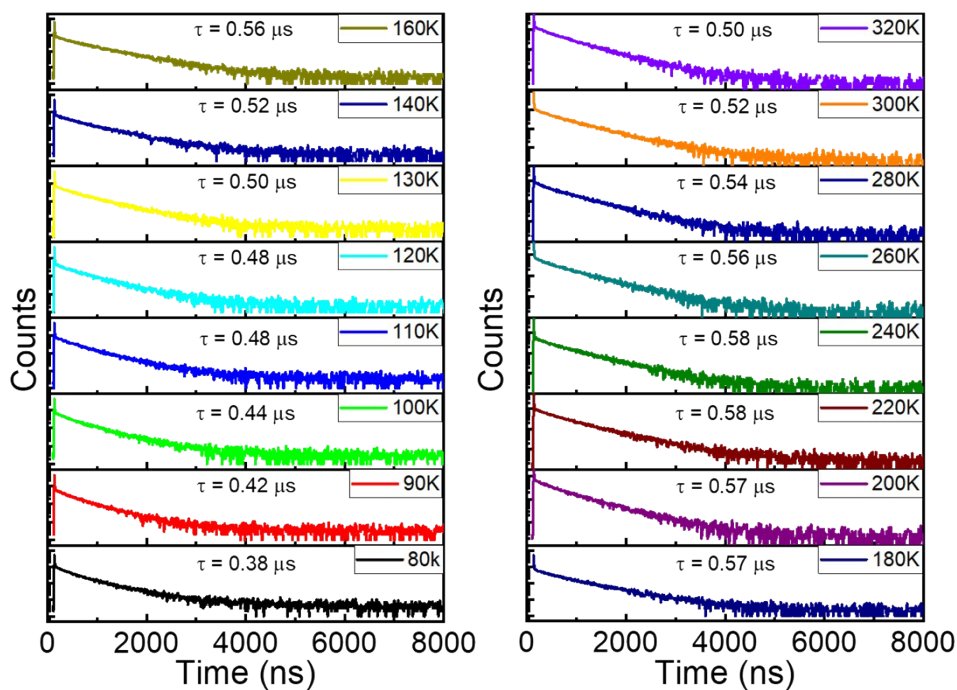

**Figure S34** Time-resolved photoluminescence decay profiles of [(pbib)Ir(pmpMe<sub>3</sub>)CN] in degassed toluene upon increasing temperature

from 80 K to 320 K.

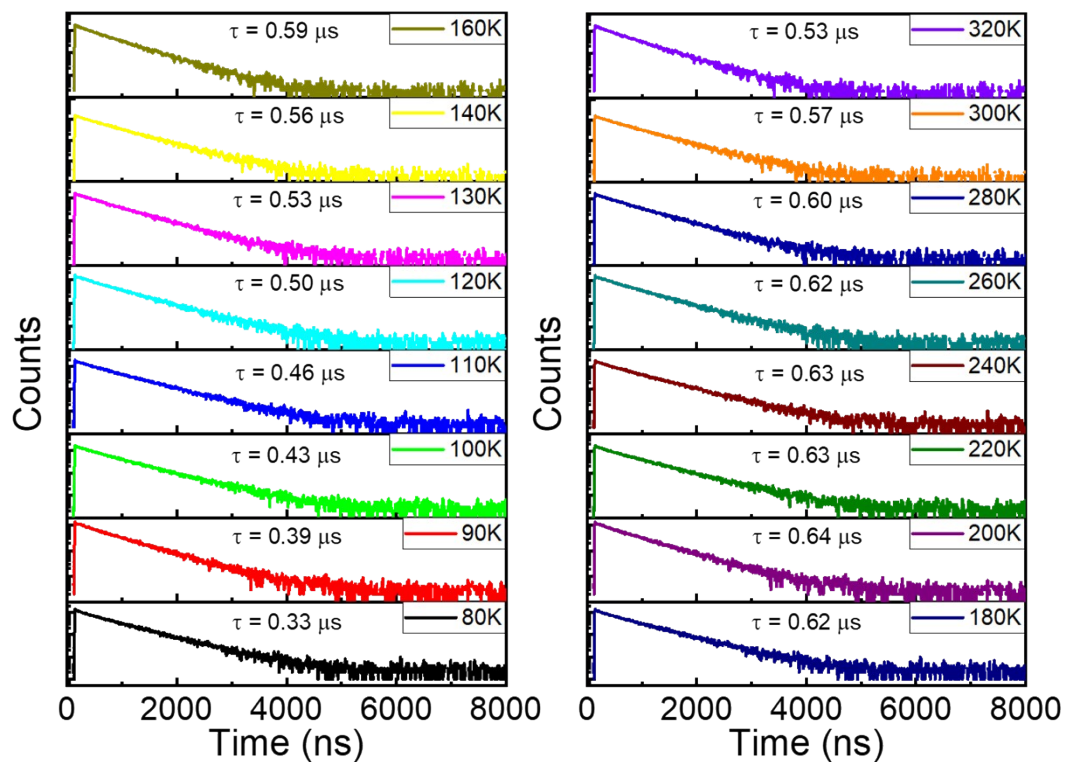

**Figure S35** Time-resolved photoluminescence decay profiles of [(pbib)Ir(pmpMe<sub>2</sub>Bz)CN] in degassed toluene upon increasing temperature from 80 K to 320 K.

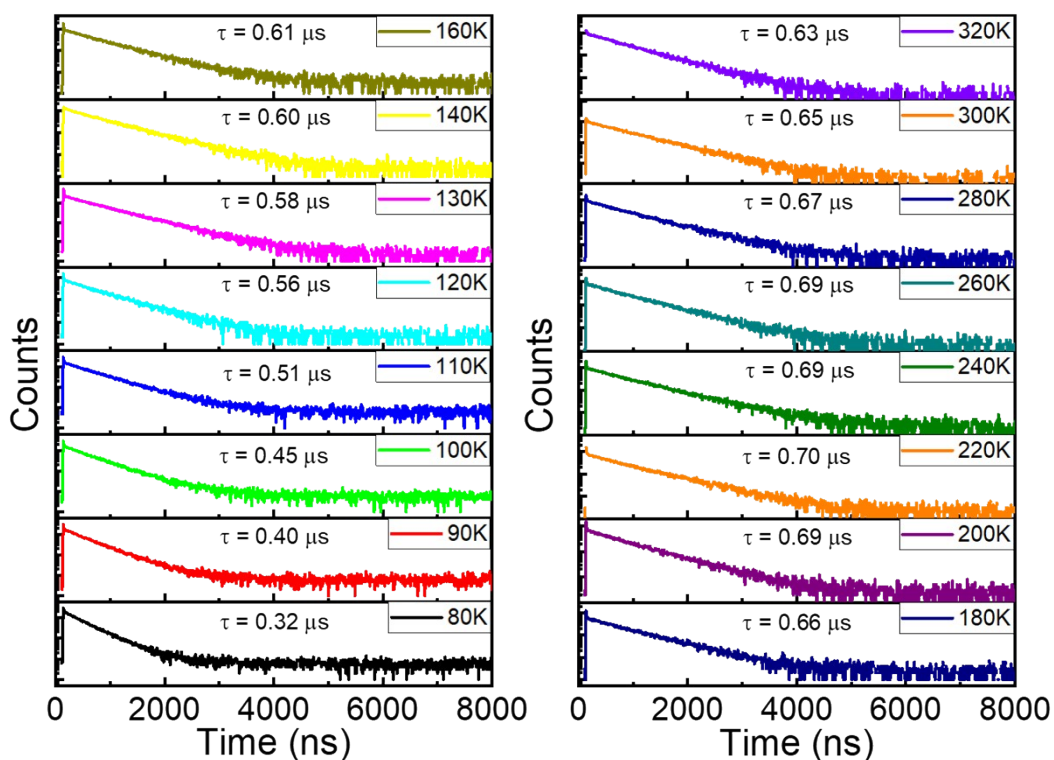

**Figure S36** Time-resolved photoluminescence decay profiles of  $[(\text{pbib})\text{Ir}(\text{pmpMe}_3\text{Bz})\text{CN}]$  in degassed toluene upon increasing temperature from 80 K to 320 K.

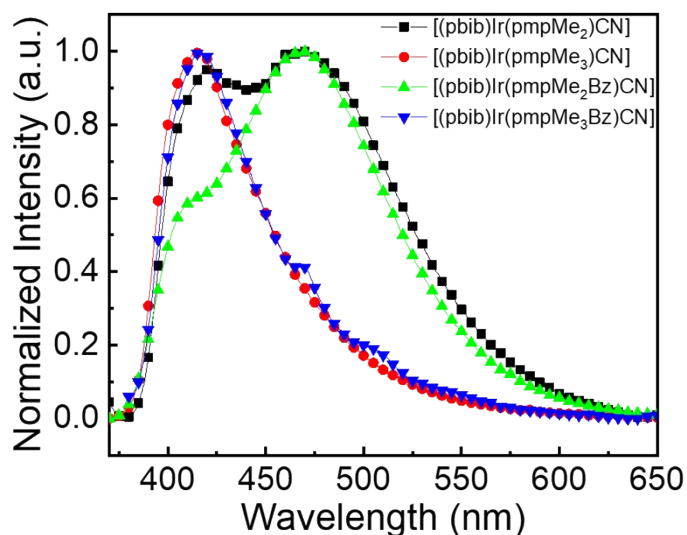

**Figure S37** Normalized emission spectra of iridium(III) complexes in powder at 298 K.

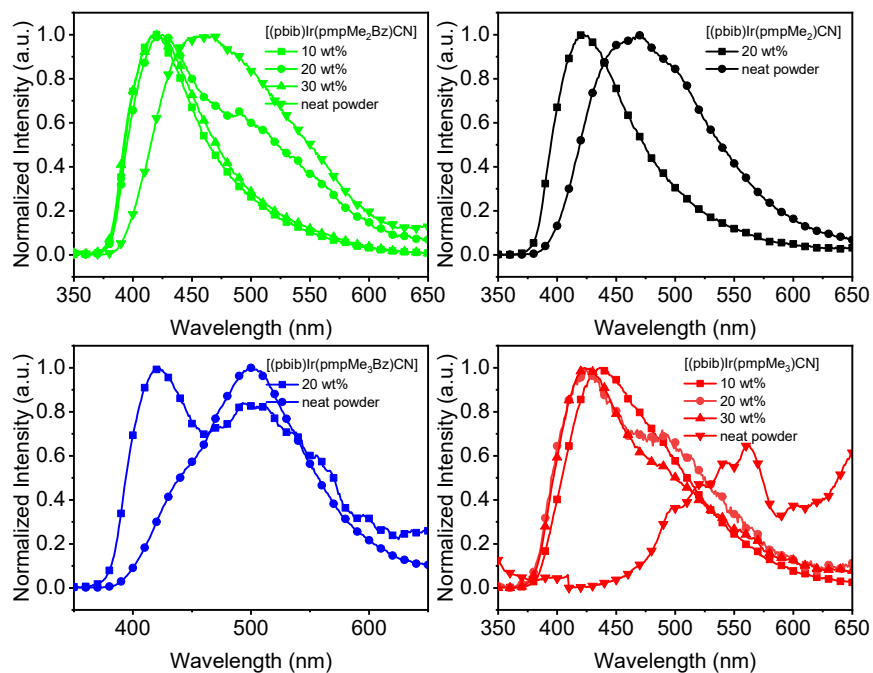

**Figure S38** Normalized emission spectra of iridium(III) complexes doped in DPEPO at 298 K.

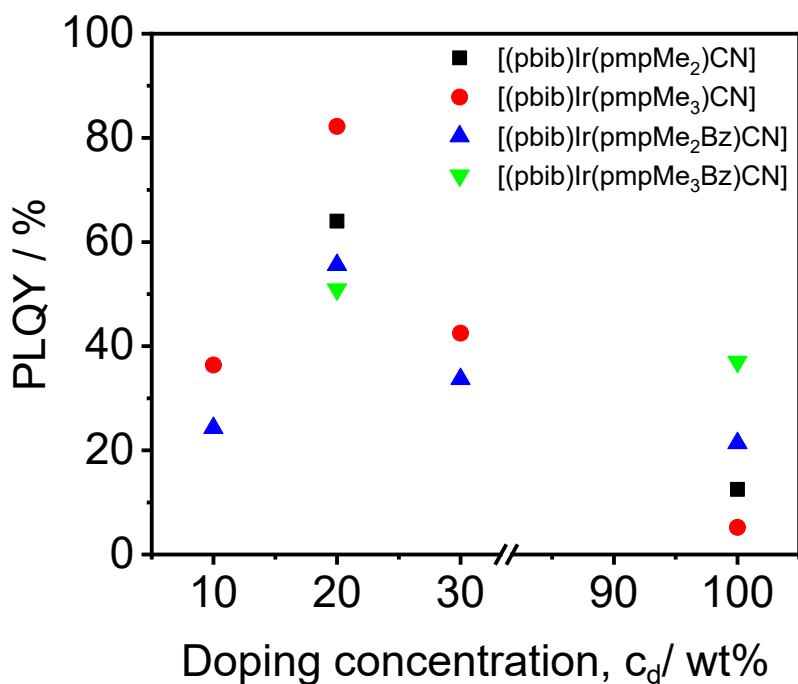

**Figure S39** PLQY vs doping concentration for vacuum-deposited doped films of the iridium complexes in DPEPO



**Table S2.** Solid state emission data for the iridium(III) complexes doped in DPEPO.

| Complex                             | C <sub>D</sub> / wt% | $\lambda$ / nm | $\phi_{\text{PL}}$ / % |
|-------------------------------------|----------------------|----------------|------------------------|
| [(pbib)Ir(pmpMe <sub>2</sub> )CN]   | 20                   | 423            | 64.0                   |
|                                     | 100                  | 469            | 12.5                   |
| [(pbib)Ir(pmpMe <sub>3</sub> )CN]   | 10                   | 436            | 36.4                   |
|                                     | 20                   | 424            | 82.2                   |
|                                     | 30                   | 423            | 42.5                   |
|                                     | 100                  | 560            | 5.2                    |
| [(pbib)Ir(pmpMe <sub>2</sub> Bz)CN] | 10                   | 420            | 24.3                   |
|                                     | 20                   | 425            | 55.6                   |
|                                     | 30                   | 419            | 33.7                   |
|                                     | 100                  | 462            | 21.4                   |
| [(pbib)Ir(pmpMe <sub>3</sub> Bz)CN] | 20                   | 421            | 50.9                   |
|                                     | 100                  | 501            | 37.0                   |

## Computational Details

All calculations were performed with the Gaussian 16 program suite.<sup>1</sup> By density functional theory (DFT), the ground-state ( $S_0$ ) geometries of the iridium(III) complexes were fully optimized in toluene with the hybrid B3LYP functional,<sup>2-5</sup> in conjunction with the conductor-like polarizable continuum model (CPCM).<sup>6, 7</sup> At the same level of theory, time-dependent density functional theory<sup>8-10</sup> (TDDFT) calculations were performed on the optimized  $S_0$  geometries to compute the singlet-singlet transitions in the absorption spectra of the iridium(III) complexes. In order to investigate the emissive states of the complexes, the geometries of the lowest-lying triplet excited states ( $T_1$ ) have been optimized with the unrestricted UB3LYP/CPCM method. The vibrational frequencies of all the stationary points have been computed and all of them were verified as minima (NIMAG = 0) on the potential energy surface. The Cartesian coordinates of the optimized geometries of both the  $S_0$  and  $T_1$  states were given in Tables S4–S11. In all the calculations, the LanL2DZ basis set with effective core potential<sup>11-13</sup> (ECP) was employed for Ir with f-type polarization functions ( $\zeta = 0.938$ ),<sup>14</sup> whereas the 6-31G(d,p) basis set<sup>15-17</sup> was applied to all other elements (C, H, and N). A pruned (99,590) grid was used for numerical integration.

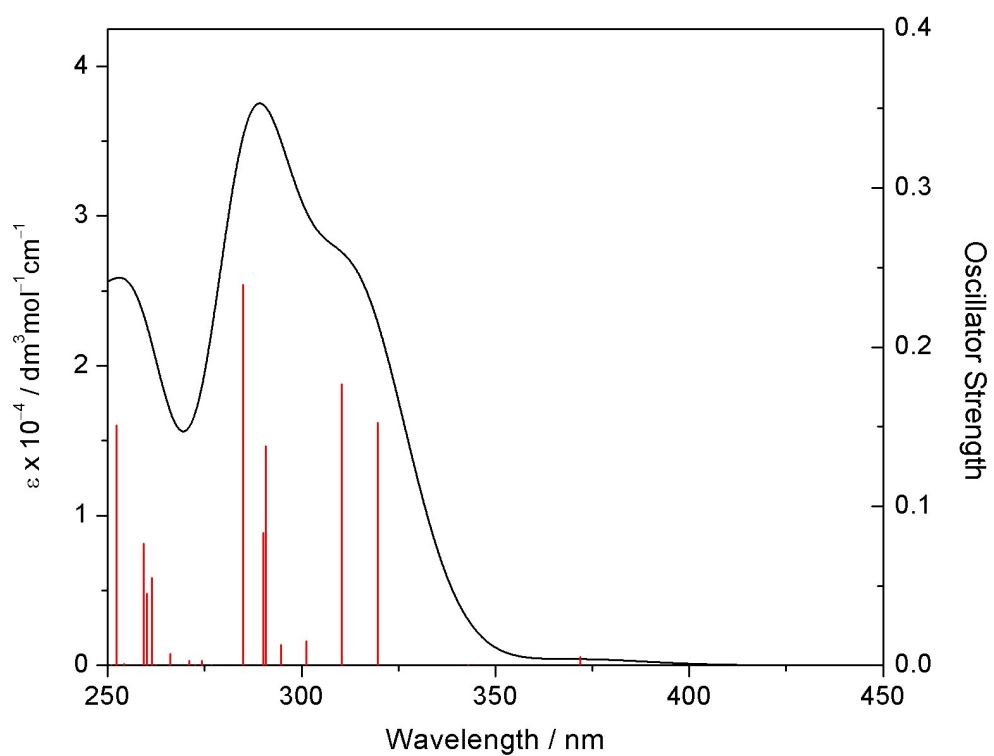

**Figure S40** Simulated UV-Vis spectrum of  $[(\text{pbib})\text{Ir}(\text{pmpMe}_2)\text{CN}]$  computed by TDDFT/CPCM using toluene as the solvent.

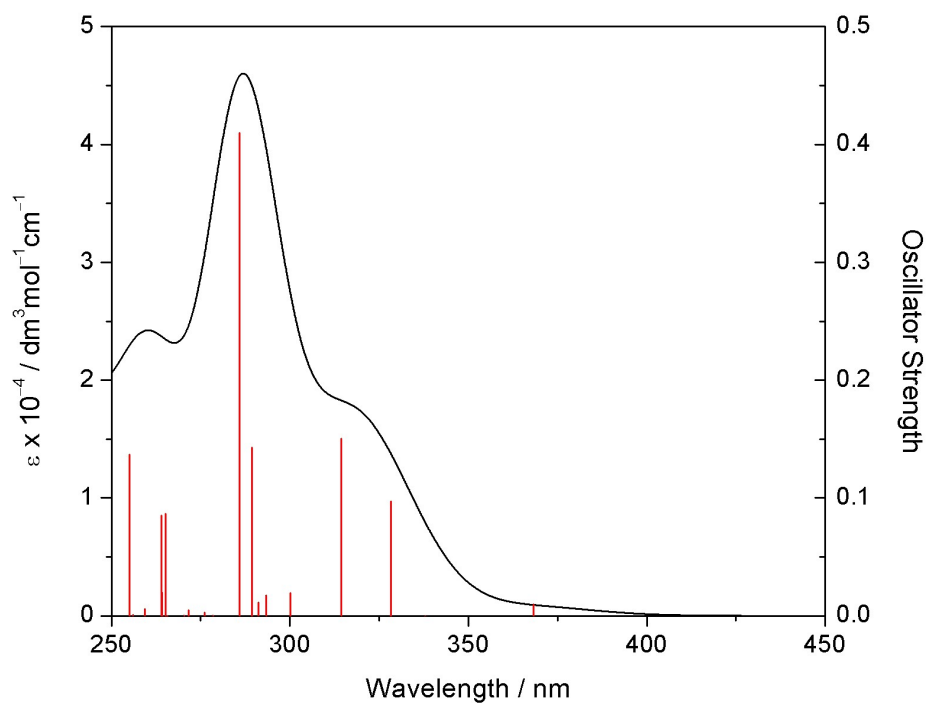

**Figure S41** Simulated UV-Vis spectrum of  $[(\text{pbib})\text{Ir}(\text{pmpMe}_3)\text{CN}]$  computed by TDDFT/CPCM using toluene as the solvent.

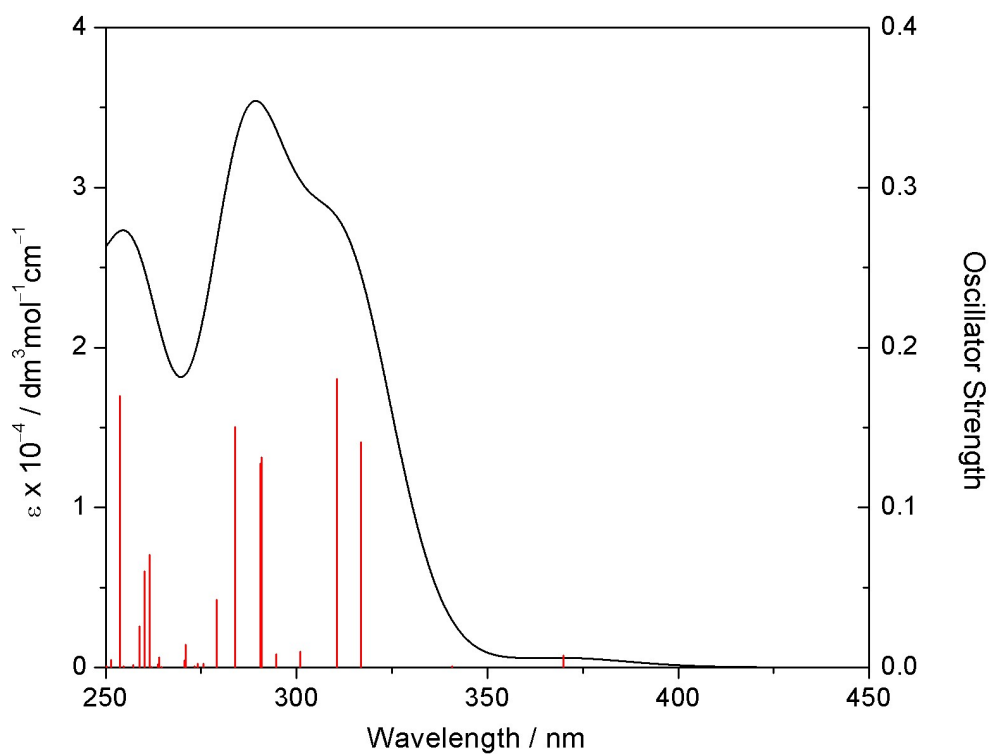

**Figure S42** Simulated UV-Vis spectrum of **[(pbib)Ir(pmpMe<sub>2</sub>Bz)CN]** computed by TDDFT/CPCM using toluene as the solvent.

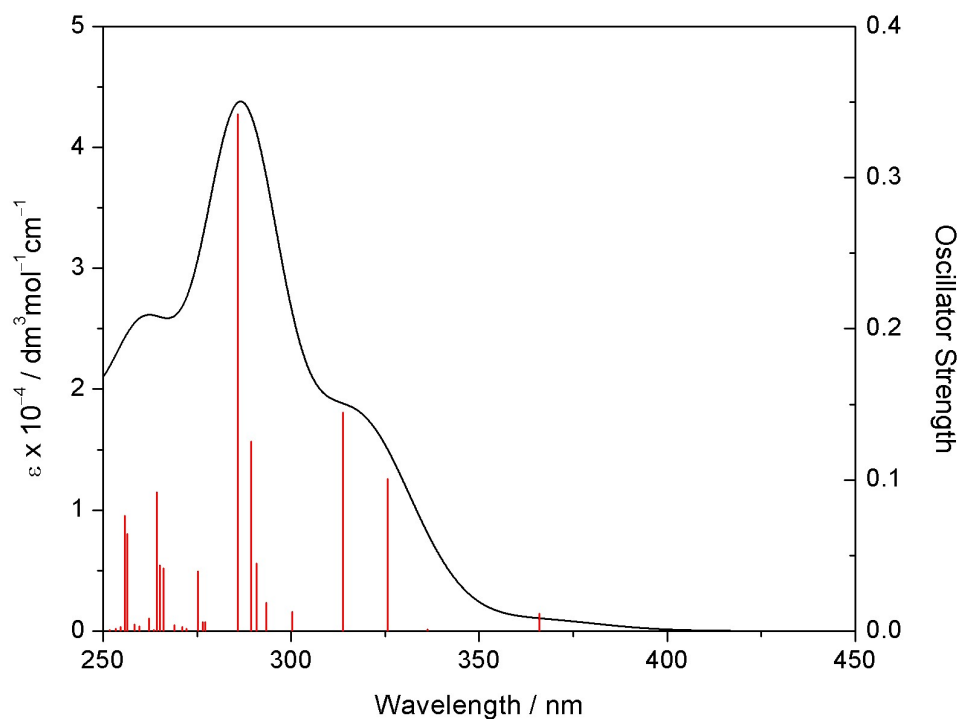

**Figure S43** Simulated UV-Vis spectrum of **[(pbib)Ir(pmpMe<sub>3</sub>Bz)CN]** computed by TDDFT/CPCM using toluene as the solvent.

**Table S3** The first fifteen singlet excited states ( $S_n$ ) of the four iridium(III) complexes computed by TDDFT/CPCM using toluene as the solvent.

| Complex                                  | $S_n$           | Excitation <sup>a</sup><br>(Coefficient) <sup>b</sup> | Vertical<br>excitation<br>wavelength (nm) | $f^c$ |
|------------------------------------------|-----------------|-------------------------------------------------------|-------------------------------------------|-------|
| <b>[(pbib)Ir(pmpMe<sub>2</sub>)CN]</b>   | S <sub>1</sub>  | H→L (0.70)                                            | 372                                       | 0.005 |
|                                          | S <sub>2</sub>  | H-1→L (0.70)                                          | 343                                       | 0.000 |
|                                          | S <sub>3</sub>  | H-2→L (0.69)                                          | 320                                       | 0.153 |
|                                          | S <sub>4</sub>  | H-3→L (0.65)                                          | 310                                       | 0.177 |
|                                          | S <sub>5</sub>  | H→L+1 (0.67)                                          | 301                                       | 0.015 |
|                                          | S <sub>6</sub>  | H→L+3 (0.50)                                          | 295                                       | 0.013 |
|                                          | S <sub>7</sub>  | H-1→L+1 (-0.48)                                       | 291                                       | 0.138 |
|                                          |                 | H-1→L+1 (0.49)                                        |                                           |       |
|                                          | S <sub>8</sub>  | H→L+3 (0.48)                                          | 290                                       | 0.083 |
|                                          |                 | H→L+2 (0.57)                                          |                                           |       |
|                                          | S <sub>9</sub>  | H-4→L (-0.32)                                         | 285                                       | 0.239 |
|                                          |                 | H-4→L (0.59)                                          |                                           |       |
|                                          | S <sub>10</sub> | H→L+2 (0.33)                                          | 277                                       | 0.000 |
|                                          |                 | H-5→L (0.69)                                          |                                           |       |
|                                          | S <sub>11</sub> | H-1→L+3 (0.64)                                        | 274                                       | 0.003 |
| S <sub>12</sub>                          | H-1→L+2 (0.66)  | 272                                                   | 0.000                                     |       |
| S <sub>13</sub>                          | H-2→L+1 (0.52)  | 271                                                   | 0.003                                     |       |
|                                          | H-3→L+1 (0.43)  |                                                       |                                           |       |
| S <sub>14</sub>                          | H→L+4 (0.61)    | 266                                                   | 0.007                                     |       |
| S <sub>15</sub>                          | H-7→L (0.68)    | 266                                                   | 0.000                                     |       |
| <b>[(pbib)Ir(pmpMe<sub>3</sub>)CN]</b>   | S <sub>1</sub>  | H→L (0.70)                                            | 368                                       | 0.010 |
|                                          | S <sub>2</sub>  | H-1→L (0.70)                                          | 338                                       | 0.000 |
|                                          | S <sub>3</sub>  | H-2→L (0.70)                                          | 328                                       | 0.097 |
|                                          | S <sub>4</sub>  | H-3→L (0.66)                                          | 314                                       | 0.150 |
|                                          | S <sub>5</sub>  | H→L+1 (0.66)                                          | 300                                       | 0.019 |
|                                          | S <sub>6</sub>  | H-1→L+1 (0.50)                                        | 293                                       | 0.018 |
|                                          |                 | H→L+3 (-0.48)                                         |                                           |       |
|                                          | S <sub>7</sub>  | H-4→L (0.49)                                          | 291                                       | 0.012 |
|                                          |                 | H→L+2 (0.45)                                          |                                           |       |
|                                          | S <sub>8</sub>  | H→L+3 (0.49)                                          | 289                                       | 0.143 |
|                                          |                 | H-1→L+1 (0.47)                                        |                                           |       |
|                                          | S <sub>9</sub>  | H→L+2 (0.49)                                          | 286                                       | 0.410 |
|                                          |                 | H-4→L (-0.45)                                         |                                           |       |
|                                          | S <sub>10</sub> | H-5→L (0.69)                                          | 278                                       | 0.000 |
|                                          | S <sub>11</sub> | H-2→L+1 (0.63)                                        | 276                                       | 0.003 |
| S <sub>12</sub>                          | H-1→L+3 (0.62)  | 272                                                   | 0.005                                     |       |
| S <sub>13</sub>                          | H-1→L+2 (0.66)  | 270                                                   | 0.000                                     |       |
| S <sub>14</sub>                          | H-2→L+3 (0.55)  | 266                                                   | 0.000                                     |       |
|                                          | H-3→L+3 (0.31)  |                                                       |                                           |       |
| S <sub>15</sub>                          | H-2→L+2 (0.60)  | 265                                                   | 0.087                                     |       |
| <b>[(pbib)Ir(pmpMe<sub>2</sub>Bz)CN]</b> | S <sub>1</sub>  | H→L (0.70)                                            | 370                                       | 0.008 |
|                                          | S <sub>2</sub>  | H-1→L (0.69)                                          | 341                                       | 0.001 |
|                                          | S <sub>3</sub>  | H-2→L (0.69)                                          | 317                                       | 0.141 |

|                                          |                 |                 |     |       |
|------------------------------------------|-----------------|-----------------|-----|-------|
|                                          | S <sub>4</sub>  | H-3→L (0.65)    | 311 | 0.180 |
|                                          | S <sub>5</sub>  | H→L+1 (0.67)    | 301 | 0.010 |
|                                          | S <sub>6</sub>  | H→L+5 (0.46)    | 295 | 0.008 |
|                                          |                 | H-1→L+1 (0.45)  |     |       |
|                                          | S <sub>7</sub>  | H→L+2 (0.47)    | 291 | 0.131 |
|                                          |                 | H-1→L+1 (-0.34) |     |       |
|                                          | S <sub>8</sub>  | H-1→L+1 (0.39)  | 290 | 0.127 |
|                                          |                 | H→L+2 (0.34)    |     |       |
|                                          |                 | H→L+5 (-0.34)   |     |       |
|                                          | S <sub>9</sub>  | H-4→L (0.63)    | 284 | 0.151 |
|                                          | S <sub>10</sub> | H→L+3 (0.63)    | 279 | 0.042 |
|                                          | S <sub>11</sub> | H-5→L (0.67)    | 276 | 0.002 |
|                                          | S <sub>12</sub> | H-1→L+5 (0.52)  | 274 | 0.003 |
|                                          | S <sub>13</sub> | H-1→L+2 (0.59)  | 273 | 0.001 |
|                                          | S <sub>14</sub> | H→L+4 (0.45)    | 271 | 0.014 |
|                                          |                 | H-2→L+1 (-0.34) |     |       |
|                                          | S <sub>15</sub> | H-3→L+1 (0.39)  | 271 | 0.004 |
|                                          |                 | H→L+4 (-0.38)   |     |       |
|                                          |                 | H-2→L+1 (-0.36) |     |       |
| <b>[(pbib)Ir(pmpMe<sub>3</sub>Bz)CN]</b> | S <sub>1</sub>  | H→L (0.70)      | 366 | 0.012 |
|                                          | S <sub>2</sub>  | H-1→L (0.69)    | 336 | 0.001 |
|                                          | S <sub>3</sub>  | H-2→L (0.69)    | 326 | 0.101 |
|                                          | S <sub>4</sub>  | H-3→L (0.66)    | 314 | 0.145 |
|                                          | S <sub>5</sub>  | H→L+1 (0.66)    | 300 | 0.013 |
|                                          | S <sub>6</sub>  | H-1→L+1 (0.49)  | 293 | 0.019 |
|                                          |                 | H→L+5 (-0.43)   |     |       |
|                                          | S <sub>7</sub>  | H→L+2 (0.52)    | 291 | 0.045 |
|                                          |                 | H-4→L (-0.33)   |     |       |
|                                          | S <sub>8</sub>  | H→L+5 (0.45)    | 289 | 0.126 |
|                                          |                 | H-1→L+1 (0.43)  |     |       |
|                                          | S <sub>9</sub>  | H-4→L (0.55)    | 286 | 0.342 |
|                                          |                 | H→L+2 (0.37)    |     |       |
|                                          | S <sub>10</sub> | H-5→L (0.68)    | 277 | 0.006 |
|                                          | S <sub>11</sub> | H-2→L+1 (0.61)  | 276 | 0.006 |
|                                          | S <sub>12</sub> | H→L+3 (0.62)    | 275 | 0.039 |
|                                          | S <sub>13</sub> | H-1→L+2 (0.49)  | 272 | 0.002 |
|                                          |                 | H-1→L+5 (0.38)  |     |       |
|                                          | S <sub>14</sub> | H-1→L+2 (0.44)  | 271 | 0.003 |
|                                          |                 | H-1→L+5 (-0.40) |     |       |
|                                          | S <sub>15</sub> | H→L+4 (0.64)    | 269 | 0.004 |

<sup>a</sup> Orbitals involved in the major excitation (H = HOMO and L = LUMO).

<sup>b</sup> The coefficients in the configuration interaction (CI) expansion.

<sup>c</sup> Oscillator strengths.

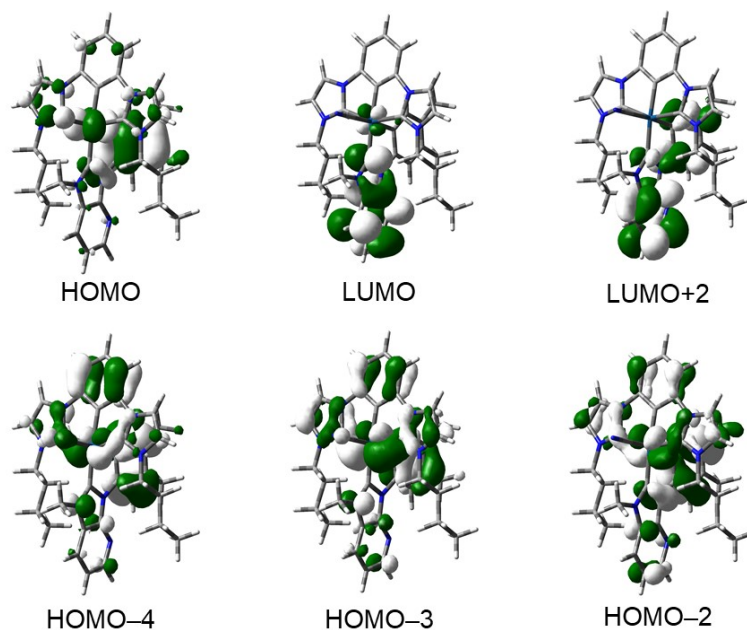

**Figure S44** Spatial plots of (isovalue = 0.03) of selected molecular orbitals of **[(pbib)Ir(pmpMe<sub>2</sub>)CN]** at the optimized B3LYP ground-state geometry.

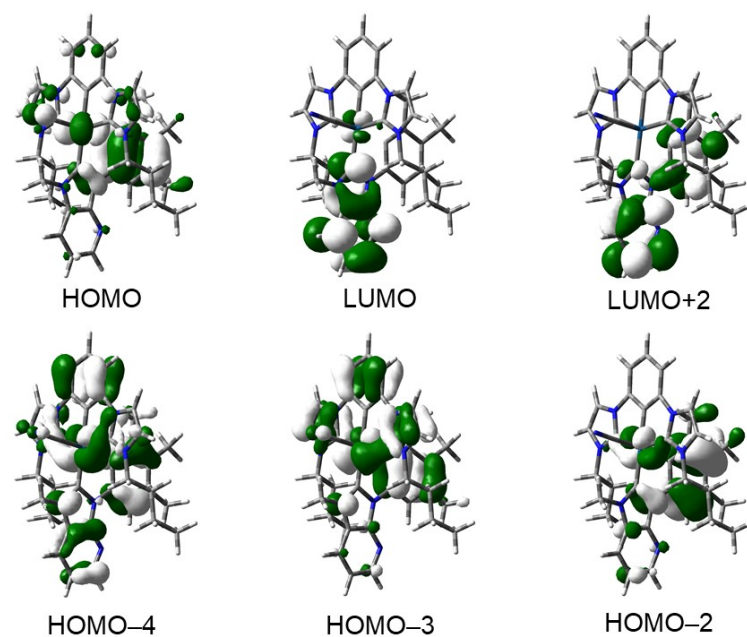

**Figure S45** Spatial plots of (isovalue = 0.03) of selected molecular orbitals of **[(pbib)Ir(pmpMe<sub>3</sub>)CN]** at the optimized B3LYP ground-state geometry.

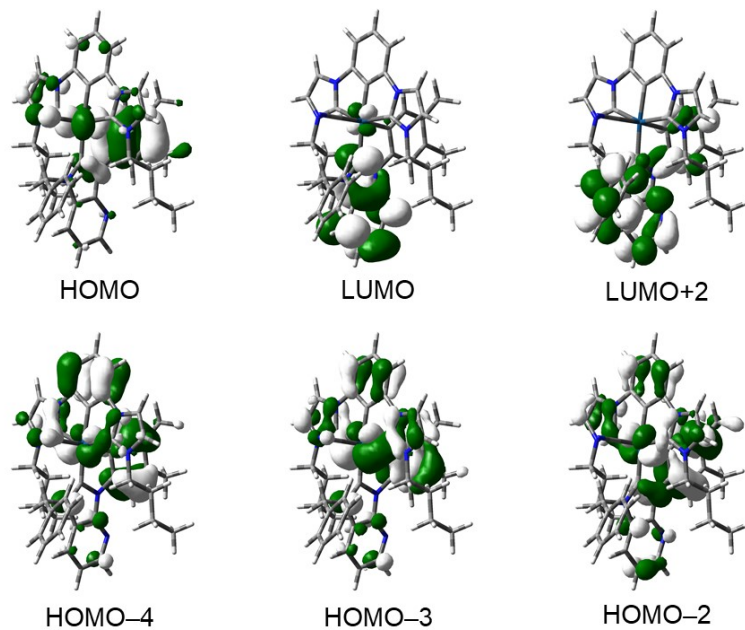

**Figure S46** Spatial plots of (isovalue = 0.03) of selected molecular orbitals of [(pbib)Ir(pmpMe<sub>2</sub>Bz)CN] at the optimized B3LYP ground-state geometry.

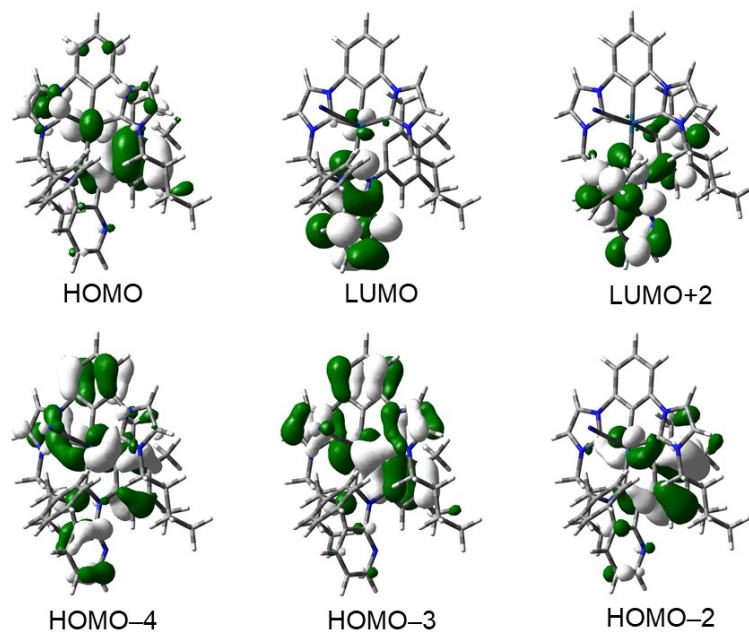

**Figure S47** Spatial plots of (isovalue = 0.03) of selected molecular orbitals of [(pbib)Ir(pmpMe<sub>3</sub>Bz)CN] at the optimized B3LYP ground-state geometry.



**Table S4** Relative energies of the lowest triplet excited states ( $T_1$ ) of the iridium(III) complexes optimized at the B3LYP level.

| Complex                                  | $\Delta E(T_1-S_0)/\text{cm}^{-1}$ ( $\lambda/\text{nm}$ ) <sup>a</sup> |
|------------------------------------------|-------------------------------------------------------------------------|
| <b>[(pbib)Ir(pmpMe<sub>2</sub>)CN]</b>   | 24654 (406)                                                             |
| <b>[(pbib)Ir(pmpMe<sub>3</sub>)CN]</b>   | 24769 (404)                                                             |
| <b>[(pbib)Ir(pmpMe<sub>2</sub>Bz)CN]</b> | 24635 (406)                                                             |
| <b>[(pbib)Ir(pmpMe<sub>3</sub>Bz)CN]</b> | 24798 (403)                                                             |

<sup>a</sup> Energy difference between the lowest triplet excited state ( $T_1$ ) and the ground state ( $S_0$ ) at the corresponding optimized geometries in toluene solution.

**Table S5** Cartesian coordinates of the optimized  $S_0$  geometry of [(pbib)Ir(pmpMe<sub>2</sub>)CN] in toluene.

|    |           |           |           |   |           |           |           |
|----|-----------|-----------|-----------|---|-----------|-----------|-----------|
| C  | 2.895796  | 0.000079  | -0.123395 | H | -2.103524 | -0.890731 | -3.918955 |
| C  | 3.571031  | 1.197437  | 0.079397  | H | -2.103606 | 0.889544  | -3.919155 |
| C  | 3.571135  | -1.197175 | 0.079659  | H | -0.598299 | -0.000485 | -3.572760 |
| C  | 4.909009  | 1.227279  | 0.476899  | C | 0.235341  | 0.000178  | 1.293794  |
| C  | 4.909113  | -1.226815 | 0.477179  | C | -1.166498 | 0.000126  | 1.420380  |
| C  | 5.561756  | 0.000281  | 0.669875  | C | 0.939202  | 0.000379  | 2.506334  |
| H  | 5.444231  | 2.158510  | 0.636276  | C | -1.830780 | 0.000273  | 2.649623  |
| H  | 5.444411  | -2.157965 | 0.636772  | C | 0.316395  | 0.000528  | 3.764124  |
| H  | 6.602862  | 0.000361  | 0.977267  | C | -1.092208 | 0.000477  | 3.837662  |
| C  | 2.933479  | -3.666864 | -0.103680 | C | 1.153146  | 0.000738  | 5.022790  |
| C  | 1.761988  | -4.260571 | -0.445238 | H | 0.950555  | -0.878182 | 5.648017  |
| H  | 3.886933  | -4.092609 | 0.162695  | H | 2.220366  | 0.000747  | 4.784514  |
| H  | 1.500416  | -5.303234 | -0.529863 | H | 0.950486  | 0.879817  | 5.647770  |
| C  | 1.761524  | 4.260563  | -0.445831 | C | -1.807022 | 0.000628  | 5.169181  |
| C  | 2.933091  | 3.667029  | -0.104235 | H | -1.546952 | -0.878318 | 5.772584  |
| H  | 1.499827  | 5.303186  | -0.530547 | H | -1.546900 | 0.879672  | 5.772415  |
| H  | 3.886493  | 4.092917  | 0.162097  | H | -2.892051 | 0.000645  | 5.033072  |
| C  | 1.409015  | -2.022548 | -0.543577 | H | -2.914114 | 0.000231  | 2.681133  |
| N  | 2.709629  | -2.301553 | -0.164943 | H | 2.026718  | 0.000422  | 2.481007  |
| N  | 0.845423  | -3.245331 | -0.713840 |   |           |           |           |
| C  | 1.408840  | 2.022487  | -0.544026 |   |           |           |           |
| N  | 2.709429  | 2.301686  | -0.165443 |   |           |           |           |
| N  | 0.845087  | 3.245187  | -0.714363 |   |           |           |           |
| C  | -0.551096 | 3.493818  | -1.078102 |   |           |           |           |
| H  | -0.565997 | 4.343305  | -1.769059 |   |           |           |           |
| H  | -0.899811 | 2.616287  | -1.623760 |   |           |           |           |
| C  | -1.443018 | 3.769223  | 0.137933  |   |           |           |           |
| H  | -1.402811 | 2.903223  | 0.809030  |   |           |           |           |
| H  | -1.038096 | 4.621542  | 0.699131  |   |           |           |           |
| C  | -2.895388 | 4.058681  | -0.262602 |   |           |           |           |
| H  | -3.277021 | 3.229343  | -0.873010 |   |           |           |           |
| H  | -2.925817 | 4.949556  | -0.904526 |   |           |           |           |
| C  | -3.814125 | 4.262050  | 0.946402  |   |           |           |           |
| H  | -4.838370 | 4.487820  | 0.632591  |   |           |           |           |
| H  | -3.846140 | 3.362087  | 1.570066  |   |           |           |           |
| H  | -3.466794 | 5.090887  | 1.573571  |   |           |           |           |
| C  | -0.550759 | -3.494155 | -1.077451 |   |           |           |           |
| H  | -0.899530 | -2.616846 | -1.623432 |   |           |           |           |
| H  | -0.565637 | -4.343902 | -1.768087 |   |           |           |           |
| C  | -1.442636 | -3.769147 | 0.138711  |   |           |           |           |
| H  | -1.037679 | -4.621268 | 0.700184  |   |           |           |           |
| H  | -1.402411 | -2.902918 | 0.809511  |   |           |           |           |
| C  | -2.895019 | -4.058750 | -0.261668 |   |           |           |           |
| H  | -3.276675 | -3.229629 | -0.872356 |   |           |           |           |
| H  | -2.925469 | -4.949852 | -0.903276 |   |           |           |           |
| C  | -3.813711 | -4.261692 | 0.947442  |   |           |           |           |
| H  | -4.837966 | -4.487580 | 0.633748  |   |           |           |           |
| H  | -3.466353 | -5.090302 | 1.574894  |   |           |           |           |
| H  | -3.845710 | -3.361505 | 1.570784  |   |           |           |           |
| C  | 1.529906  | -0.000334 | -2.656617 |   |           |           |           |
| N  | 1.869126  | -0.000537 | -3.779373 |   |           |           |           |
| Ir | 0.960456  | -0.000065 | -0.679031 |   |           |           |           |
| C  | -1.094999 | -0.000191 | -0.982870 |   |           |           |           |
| C  | -3.215992 | -0.000185 | -0.132045 |   |           |           |           |
| C  | -3.296828 | -0.000383 | -1.539801 |   |           |           |           |
| C  | -4.542667 | -0.000539 | -2.152960 |   |           |           |           |
| C  | -5.457255 | -0.000283 | 0.094769  |   |           |           |           |
| C  | -5.646914 | -0.000483 | -1.292485 |   |           |           |           |
| H  | -4.658874 | -0.000692 | -3.231436 |   |           |           |           |
| H  | -6.318005 | -0.000247 | 0.758689  |   |           |           |           |
| H  | -6.654324 | -0.000596 | -1.694065 |   |           |           |           |
| N  | -1.859178 | -0.000077 | 0.171487  |   |           |           |           |
| N  | -4.254126 | -0.000132 | 0.696586  |   |           |           |           |
| N  | -1.993900 | -0.000375 | -2.020369 |   |           |           |           |
| C  | -1.678498 | -0.000520 | -3.444963 |   |           |           |           |

**Table S6** Cartesian coordinates of the optimized  $S_0$  geometry of **[(pbib)Ir(pmpMe<sub>3</sub>)CN]** in toluene.

|    |           |           |           |   |           |           |           |
|----|-----------|-----------|-----------|---|-----------|-----------|-----------|
| C  | 2.928261  | -0.000065 | -0.021190 | H | -1.475163 | -0.889605 | -4.326854 |
| C  | 3.620604  | 1.197815  | 0.112347  | H | -1.474617 | 0.890994  | -4.326399 |
| C  | 3.620517  | -1.198006 | 0.112241  | H | -0.044037 | 0.000117  | -3.750617 |
| C  | 4.981999  | 1.227022  | 0.418075  | C | -0.080171 | -0.000075 | 1.270709  |
| C  | 4.981909  | -1.227339 | 0.417969  | C | -1.483584 | -0.000078 | 1.097338  |
| C  | 5.644639  | -0.000190 | 0.572953  | C | 0.338568  | -0.000187 | 2.626727  |
| H  | 5.529394  | 2.157943  | 0.531008  | C | -2.412977 | -0.000190 | 2.136915  |
| H  | 5.529236  | -2.158311 | 0.530822  | C | -0.587387 | -0.000332 | 3.705201  |
| H  | 6.703723  | -0.000239 | 0.810956  | C | -1.971954 | -0.000326 | 3.460461  |
| C  | 2.970945  | -3.665329 | -0.020936 | C | -0.068398 | -0.000485 | 5.128737  |
| C  | 1.787386  | -4.260344 | -0.314212 | H | -0.875874 | -0.000823 | 5.861510  |
| H  | 3.930364  | -4.089600 | 0.225694  | H | 0.558419  | -0.877582 | 5.331961  |
| H  | 1.519377  | -5.303365 | -0.369258 | H | 0.557992  | 0.876842  | 5.332308  |
| C  | 1.787659  | 4.260320  | -0.313700 | C | -3.002297 | -0.000452 | 4.570968  |
| C  | 2.971187  | 3.665196  | -0.020524 | H | -2.914463 | -0.880967 | 5.218643  |
| H  | 1.519713  | 5.303364  | -0.368614 | H | -2.914422 | 0.879884  | 5.218879  |
| H  | 3.930637  | 4.089378  | 0.226141  | H | -4.013335 | -0.000375 | 4.154165  |
| C  | 1.437798  | -2.022470 | -0.442785 | C | 1.801625  | -0.000160 | 3.010876  |
| N  | 2.749575  | -2.300363 | -0.098720 | H | 2.442258  | 0.000215  | 2.137503  |
| N  | 0.865797  | -3.247119 | -0.572340 | H | 2.058174  | 0.877114  | 3.619374  |
| C  | 1.437933  | 2.022484  | -0.442557 | H | 2.058379  | -0.877812 | 3.618750  |
| N  | 2.749736  | 2.300254  | -0.098491 | H | -3.472515 | -0.000172 | 1.914386  |
| N  | 0.866002  | 3.247184  | -0.571939 |   |           |           |           |
| C  | -0.544544 | 3.502186  | -0.870468 |   |           |           |           |
| H  | -0.588798 | 4.355636  | -1.555474 |   |           |           |           |
| H  | -0.921041 | 2.628917  | -1.403937 |   |           |           |           |
| C  | -1.374981 | 3.773117  | 0.389327  |   |           |           |           |
| H  | -1.292906 | 2.907282  | 1.056135  |   |           |           |           |
| H  | -0.947870 | 4.630475  | 0.926179  |   |           |           |           |
| C  | -2.849353 | 4.048407  | 0.068323  |   |           |           |           |
| H  | -3.263194 | 3.200790  | -0.493590 |   |           |           |           |
| H  | -2.924072 | 4.921868  | -0.593791 |   |           |           |           |
| C  | -3.692267 | 4.280645  | 1.326335  |   |           |           |           |
| H  | -4.738837 | 4.477624  | 1.072647  |   |           |           |           |
| H  | -3.665428 | 3.403297  | 1.981622  |   |           |           |           |
| H  | -3.320670 | 5.137140  | 1.900323  |   |           |           |           |
| C  | -0.544755 | -3.502004 | -0.870946 |   |           |           |           |
| H  | -0.921194 | -2.628634 | -1.404291 |   |           |           |           |
| H  | -0.589034 | -4.355345 | -1.556086 |   |           |           |           |
| C  | -1.375238 | -3.773094 | 0.388784  |   |           |           |           |
| H  | -0.948193 | -4.630569 | 0.925501  |   |           |           |           |
| H  | -1.293129 | -2.907377 | 1.055741  |   |           |           |           |
| C  | -2.849619 | -4.048240 | 0.067697  |   |           |           |           |
| H  | -3.263398 | -3.200493 | -0.494067 |   |           |           |           |
| H  | -2.924373 | -4.921573 | -0.594582 |   |           |           |           |
| C  | -3.692574 | -4.280666 | 1.325647  |   |           |           |           |
| H  | -4.739150 | -4.477537 | 1.071898  |   |           |           |           |
| H  | -3.321039 | -5.137290 | 1.899482  |   |           |           |           |
| H  | -3.665699 | -3.403442 | 1.981099  |   |           |           |           |
| C  | 1.818138  | 0.000126  | -2.481837 |   |           |           |           |
| N  | 2.327503  | 0.000171  | -3.537860 |   |           |           |           |
| Ir | 0.995519  | 0.000034  | -0.611249 |   |           |           |           |
| C  | -0.976957 | 0.000131  | -1.251527 |   |           |           |           |
| C  | -3.216512 | 0.000128  | -0.802806 |   |           |           |           |
| C  | -3.038748 | 0.000262  | -2.200007 |   |           |           |           |
| C  | -4.148680 | 0.000378  | -3.034447 |   |           |           |           |
| C  | -5.463215 | 0.000193  | -0.997240 |   |           |           |           |
| C  | -5.393292 | 0.000338  | -2.395504 |   |           |           |           |
| H  | -4.061081 | 0.000496  | -4.115524 |   |           |           |           |
| H  | -6.431644 | 0.000162  | -0.503314 |   |           |           |           |
| H  | -6.308793 | 0.000422  | -2.976943 |   |           |           |           |
| N  | -1.933029 | 0.000049  | -0.258293 |   |           |           |           |
| N  | -4.392469 | 0.000087  | -0.183978 |   |           |           |           |
| N  | -1.671988 | 0.000247  | -2.437437 |   |           |           |           |
| C  | -1.129419 | 0.000451  | -3.791908 |   |           |           |           |

**Table S7** Cartesian coordinates of the optimized  $S_0$  geometry of **[(pbib)Ir(pmpMe<sub>2</sub>Bz)CN]** in toluene.

|    |           |           |           |   |           |           |           |
|----|-----------|-----------|-----------|---|-----------|-----------|-----------|
| C  | 2.806955  | 1.342258  | -0.295975 | H | -2.938476 | 0.268195  | -2.902107 |
| C  | 3.145882  | 2.273288  | 0.677700  | H | -1.583675 | 1.288865  | -2.386310 |
| C  | 3.784293  | 0.911427  | -1.184710 | C | 1.239984  | -0.966380 | 0.892718  |
| C  | 4.439819  | 2.786446  | 0.784321  | C | 0.110220  | -1.766403 | 1.145785  |
| C  | 5.094398  | 1.389812  | -1.123978 | C | 2.402689  | -1.346626 | 1.577516  |
| C  | 5.401973  | 2.330496  | -0.129446 | C | 0.120692  | -2.862526 | 2.012755  |
| H  | 4.712127  | 3.514906  | 1.542068  | C | 2.461791  | -2.439744 | 2.455743  |
| H  | 5.863464  | 1.058249  | -1.815093 | C | 1.301323  | -3.210223 | 2.678082  |
| H  | 6.414220  | 2.717293  | -0.065277 | C | 3.758360  | -2.781088 | 3.153348  |
| C  | 3.828955  | -0.740267 | -3.135512 | H | 4.099411  | -3.794916 | 2.907919  |
| C  | 2.851027  | -1.516199 | -3.667306 | H | 4.552155  | -2.084886 | 2.868819  |
| H  | 4.864433  | -0.625265 | -3.410906 | H | 3.656646  | -2.743447 | 4.245430  |
| H  | 2.873737  | -2.208762 | -4.493506 | C | 1.316543  | -4.395713 | 3.615283  |
| C  | 0.606294  | 3.272596  | 3.016967  | H | 2.039365  | -5.157966 | 3.297838  |
| C  | 1.890280  | 3.398436  | 2.597149  | H | 1.598151  | -4.106252 | 4.635645  |
| H  | 0.085060  | 3.741382  | 3.836290  | H | 0.332932  | -4.870962 | 3.664464  |
| H  | 2.700483  | 3.997981  | 2.978570  | H | -0.782424 | -3.441416 | 2.166157  |
| C  | 1.906315  | -0.359921 | -1.959743 | H | 3.311842  | -0.768124 | 1.427439  |
| N  | 3.245267  | -0.039594 | -2.093328 | C | -3.498746 | 1.920212  | -1.638690 |
| N  | 1.686015  | -1.270107 | -2.942598 | C | -4.829006 | 1.901932  | -2.075430 |
| C  | 0.831700  | 1.927218  | 1.204293  | C | -3.066013 | 2.985182  | -0.834983 |
| N  | 2.020720  | 2.572300  | 1.493628  | C | -5.721711 | 2.906334  | -1.693139 |
| N  | -0.025280 | 2.374266  | 2.158296  | H | -5.168411 | 1.107583  | -2.736332 |
| C  | -1.407357 | 1.927005  | 2.346466  | C | -3.956415 | 3.987611  | -0.449412 |
| H  | -2.014403 | 2.809470  | 2.575105  | H | -2.021739 | 3.042139  | -0.546016 |
| H  | -1.749496 | 1.532175  | 1.390372  | C | -5.288322 | 3.947545  | -0.871338 |
| C  | -1.545004 | 0.873805  | 3.451825  | H | -6.750048 | 2.876737  | -2.041722 |
| H  | -0.926462 | 0.006770  | 3.192398  | H | -3.606262 | 4.810233  | 0.167651  |
| H  | -1.145632 | 1.277445  | 4.391555  | H | -5.979109 | 4.731033  | -0.573353 |
| C  | -3.001670 | 0.437901  | 3.656498  |   |           |           |           |
| H  | -3.412146 | 0.080935  | 2.702759  |   |           |           |           |
| H  | -3.606790 | 1.308831  | 3.942631  |   |           |           |           |
| C  | -3.146680 | -0.661333 | 4.713630  |   |           |           |           |
| H  | -4.195581 | -0.942664 | 4.852034  |   |           |           |           |
| H  | -2.594757 | -1.561115 | 4.420998  |   |           |           |           |
| H  | -2.758316 | -0.332411 | 5.684247  |   |           |           |           |
| C  | 0.422345  | -1.966841 | -3.189370 |   |           |           |           |
| H  | -0.376860 | -1.318168 | -2.829551 |   |           |           |           |
| H  | 0.307251  | -2.066886 | -4.273698 |   |           |           |           |
| C  | 0.357352  | -3.338740 | -2.508328 |   |           |           |           |
| H  | 1.205483  | -3.949973 | -2.843650 |   |           |           |           |
| H  | 0.476224  | -3.201665 | -1.427126 |   |           |           |           |
| C  | -0.956712 | -4.072866 | -2.805196 |   |           |           |           |
| H  | -1.803662 | -3.432692 | -2.524285 |   |           |           |           |
| H  | -1.045142 | -4.238966 | -3.887448 |   |           |           |           |
| C  | -1.066800 | -5.410696 | -2.066792 |   |           |           |           |
| H  | -2.002706 | -5.923105 | -2.311771 |   |           |           |           |
| H  | -0.240450 | -6.079640 | -2.332524 |   |           |           |           |
| H  | -1.040653 | -5.262516 | -0.981791 |   |           |           |           |
| C  | 0.471967  | 2.179363  | -1.709456 |   |           |           |           |
| N  | 0.231437  | 3.065651  | -2.439098 |   |           |           |           |
| Ir | 0.925641  | 0.636103  | -0.425964 |   |           |           |           |
| C  | -0.947975 | -0.267891 | -0.410392 |   |           |           |           |
| C  | -2.335069 | -1.906172 | 0.368907  |   |           |           |           |
| C  | -3.053759 | -1.113683 | -0.550229 |   |           |           |           |
| C  | -4.376419 | -1.436306 | -0.828501 |   |           |           |           |
| C  | -4.095230 | -3.260830 | 0.745976  |   |           |           |           |
| C  | -4.895924 | -2.545308 | -0.151377 |   |           |           |           |
| H  | -4.980826 | -0.862808 | -1.519860 |   |           |           |           |
| H  | -4.503411 | -4.120303 | 1.271781  |   |           |           |           |
| H  | -5.922313 | -2.854257 | -0.316515 |   |           |           |           |
| N  | -1.057429 | -1.361502 | 0.428900  |   |           |           |           |
| N  | -2.813831 | -2.960383 | 1.019889  |   |           |           |           |
| N  | -2.180781 | -0.127891 | -1.004125 |   |           |           |           |
| C  | -2.522417 | 0.838520  | -2.064837 |   |           |           |           |

**Table S8** Cartesian coordinates of the optimized  $S_0$  geometry of [(pbib)Ir(pmpMe<sub>3</sub>Bz)CN] in toluene.

|    |           |           |           |   |           |           |           |
|----|-----------|-----------|-----------|---|-----------|-----------|-----------|
| C  | -2.675501 | -1.563184 | -0.045077 | H | 2.891417  | -1.078298 | -2.911068 |
| C  | -2.939845 | -2.358615 | 1.063129  | H | 1.560202  | -1.923141 | -2.104922 |
| C  | -3.617276 | -1.493850 | -1.065631 | C | -1.096519 | 1.226049  | 0.652896  |
| C  | -4.143280 | -3.052400 | 1.197215  | C | 0.098671  | 1.981139  | 0.657025  |
| C  | -4.837638 | -2.166067 | -0.983474 | C | -2.193729 | 1.864290  | 1.286411  |
| C  | -5.084229 | -2.937313 | 0.162560  | C | 0.237659  | 3.242544  | 1.234969  |
| H  | -4.360823 | -3.670821 | 2.062828  | C | -2.076249 | 3.143444  | 1.893854  |
| H  | -5.581943 | -2.111373 | -1.772168 | C | -0.853888 | 3.838385  | 1.867921  |
| H  | -6.027191 | -3.468331 | 0.246911  | C | -3.284967 | 3.758993  | 2.569393  |
| C  | -3.747248 | -0.256905 | -3.298212 | H | -4.081260 | 3.986744  | 1.848764  |
| C  | -2.847423 | 0.539429  | -3.928460 | H | -3.725374 | 3.080107  | 3.308730  |
| H  | -4.740107 | -0.562117 | -3.585295 | H | -3.039479 | 4.688268  | 3.084601  |
| H  | -2.909190 | 1.062903  | -4.869194 | C | -0.676045 | 5.207797  | 2.490781  |
| C  | -0.454064 | -2.523182 | 3.653313  | H | -1.354307 | 5.952106  | 2.056901  |
| C  | -1.682669 | -2.900182 | 3.218789  | H | -0.863465 | 5.200077  | 3.571344  |
| H  | 0.065071  | -2.744733 | 4.572088  | H | 0.345521  | 5.567224  | 2.338784  |
| H  | -2.437072 | -3.512785 | 3.684545  | H | 1.190338  | 3.754717  | 1.191276  |
| C  | -1.868832 | -0.144843 | -1.999498 | C | 3.503614  | -2.358303 | -1.291517 |
| N  | -3.144751 | -0.668283 | -2.120784 | C | 4.737892  | -2.620972 | -1.896987 |
| N  | -1.708242 | 0.594415  | -3.127252 | C | 3.182534  | -3.016522 | -0.095707 |
| C  | -0.724433 | -1.606474 | 1.595079  | C | 5.645481  | -3.509617 | -1.314264 |
| N  | -1.842770 | -2.333231 | 1.965566  | H | 4.988743  | -2.136124 | -2.837906 |
| N  | 0.116770  | -1.736509 | 2.654085  | C | 4.088580  | -3.900033 | 0.490228  |
| C  | 1.413410  | -1.071998 | 2.805533  | H | 2.211358  | -2.851248 | 0.359438  |
| H  | 2.125931  | -1.810158 | 3.189449  | C | 5.324416  | -4.146655 | -0.115311 |
| H  | 1.741567  | -0.782644 | 1.807612  | H | 6.598919  | -3.702471 | -1.797648 |
| C  | 1.343946  | 0.147526  | 3.732286  | H | 3.825731  | -4.407184 | 1.414256  |
| H  | 0.610024  | 0.853672  | 3.327944  | H | 6.027366  | -4.837585 | 0.341025  |
| H  | 0.976324  | -0.166747 | 4.718107  | C | -3.560236 | 1.218299  | 1.349600  |
| C  | 2.703866  | 0.839680  | 3.888241  | H | -3.596217 | 0.310305  | 0.759243  |
| H  | 3.069932  | 1.148612  | 2.900637  | H | -3.838580 | 0.957339  | 2.380112  |
| H  | 3.438425  | 0.122195  | 4.278721  | H | -4.341834 | 1.895556  | 0.984090  |
| C  | 2.638768  | 2.062836  | 4.808417  |   |           |           |           |
| H  | 3.619500  | 2.539504  | 4.905228  |   |           |           |           |
| H  | 1.940389  | 2.809976  | 4.416053  |   |           |           |           |
| H  | 2.301009  | 1.786062  | 5.813683  |   |           |           |           |
| C  | -0.539933 | 1.417640  | -3.444899 |   |           |           |           |
| H  | 0.315908  | 0.967627  | -2.940751 |   |           |           |           |
| H  | -0.367761 | 1.344478  | -4.523903 |   |           |           |           |
| C  | -0.714968 | 2.880068  | -3.019596 |   |           |           |           |
| H  | -1.605477 | 3.294700  | -3.510298 |   |           |           |           |
| H  | -0.903255 | 2.910072  | -1.940347 |   |           |           |           |
| C  | 0.509800  | 3.737700  | -3.361637 |   |           |           |           |
| H  | 1.402232  | 3.298340  | -2.896697 |   |           |           |           |
| H  | 0.684507  | 3.712313  | -4.445963 |   |           |           |           |
| C  | 0.360302  | 5.189764  | -2.896578 |   |           |           |           |
| H  | 1.243552  | 5.782685  | -3.154971 |   |           |           |           |
| H  | -0.510184 | 5.667258  | -3.360652 |   |           |           |           |
| H  | 0.228599  | 5.240125  | -1.810303 |   |           |           |           |
| C  | -0.412107 | -2.503732 | -1.156103 |   |           |           |           |
| N  | -0.196495 | -3.544180 | -1.651512 |   |           |           |           |
| Ir | -0.857940 | -0.711000 | -0.279469 |   |           |           |           |
| C  | 1.023601  | 0.119337  | -0.547281 |   |           |           |           |
| C  | 2.507338  | 1.824992  | -0.231824 |   |           |           |           |
| C  | 3.148006  | 0.807062  | -0.965117 |   |           |           |           |
| C  | 4.468350  | 0.980919  | -1.361492 |   |           |           |           |
| C  | 4.344418  | 3.132563  | -0.250813 |   |           |           |           |
| C  | 5.068927  | 2.186625  | -0.984789 |   |           |           |           |
| H  | 5.010186  | 0.226081  | -1.918168 |   |           |           |           |
| H  | 4.814451  | 4.067517  | 0.043771  |   |           |           |           |
| H  | 6.098689  | 2.393134  | -1.255294 |   |           |           |           |
| N  | 1.211488  | 1.367486  | 0.003873  |   |           |           |           |
| N  | 3.066707  | 2.973256  | 0.134576  |   |           |           |           |
| N  | 2.219484  | -0.213012 | -1.141965 |   |           |           |           |
| C  | 2.508777  | -1.413991 | -1.941307 |   |           |           |           |

**Table S9** Cartesian coordinates of the optimized T<sub>1</sub> geometry of [(pbib)Ir(pmpMe<sub>2</sub>)CN] in toluene.

|    |           |           |           |   |           |           |           |
|----|-----------|-----------|-----------|---|-----------|-----------|-----------|
| C  | 2.908225  | -0.000727 | -0.088415 | H | -2.241019 | -0.887919 | -3.884331 |
| C  | 3.586494  | 1.198761  | 0.092635  | H | -2.241812 | 0.888594  | -3.884563 |
| C  | 3.585797  | -1.200641 | 0.092453  | H | -0.724886 | 0.001050  | -3.580825 |
| C  | 4.931296  | 1.226827  | 0.467294  | C | 0.237962  | 0.000082  | 1.269864  |
| C  | 4.930576  | -1.229541 | 0.467120  | C | -1.214616 | 0.000288  | 1.400481  |
| C  | 5.584617  | -0.001560 | 0.652343  | C | 0.941097  | 0.000207  | 2.490431  |
| H  | 5.472986  | 2.156691  | 0.612202  | C | -1.865743 | 0.000342  | 2.657481  |
| H  | 5.471722  | -2.159741 | 0.611910  | C | 0.324438  | 0.000322  | 3.738088  |
| H  | 6.630501  | -0.001888 | 0.942851  | C | -1.118129 | 0.000366  | 3.818258  |
| C  | 2.958537  | -3.671087 | -0.141705 | C | 1.149962  | 0.000362  | 4.996548  |
| C  | 1.791028  | -4.264633 | -0.502903 | H | 0.938366  | -0.878237 | 5.618998  |
| H  | 3.914257  | -4.098355 | 0.114212  | H | 2.217485  | 0.000347  | 4.764429  |
| H  | 1.539103  | -5.306973 | -0.616840 | H | 0.938374  | 0.879012  | 5.618929  |
| C  | 1.793728  | 4.263851  | -0.503097 | C | -1.804301 | 0.000474  | 5.158301  |
| C  | 2.960873  | 3.669589  | -0.141902 | H | -1.523963 | -0.878261 | 5.751891  |
| H  | 1.542473  | 5.306334  | -0.617225 | H | -1.523946 | 0.879296  | 5.751756  |
| H  | 3.916918  | 4.096253  | 0.113810  | H | -2.890284 | 0.000478  | 5.043194  |
| C  | 1.421793  | -2.031848 | -0.539706 | H | -2.948725 | 0.000416  | 2.684011  |
| N  | 2.725552  | -2.306602 | -0.165018 | H | 2.026983  | 0.000141  | 2.459067  |
| N  | 0.867776  | -3.250699 | -0.744467 |   |           |           |           |
| C  | 1.422972  | 2.031316  | -0.539360 |   |           |           |           |
| N  | 2.726896  | 2.305257  | -0.164702 |   |           |           |           |
| N  | 0.869814  | 3.250477  | -0.744508 |   |           |           |           |
| C  | -0.526138 | 3.485372  | -1.127268 |   |           |           |           |
| H  | -0.535521 | 4.295463  | -1.863909 |   |           |           |           |
| H  | -0.873302 | 2.574562  | -1.616926 |   |           |           |           |
| C  | -1.421908 | 3.826295  | 0.068625  |   |           |           |           |
| H  | -1.381135 | 2.997996  | 0.786045  |   |           |           |           |
| H  | -1.025815 | 4.710735  | 0.584944  |   |           |           |           |
| C  | -2.875278 | 4.079361  | -0.353510 |   |           |           |           |
| H  | -3.241776 | 3.218627  | -0.927674 |   |           |           |           |
| H  | -2.911185 | 4.941048  | -1.033751 |   |           |           |           |
| C  | -3.805059 | 4.322718  | 0.839455  |   |           |           |           |
| H  | -4.827498 | 4.529407  | 0.507779  |   |           |           |           |
| H  | -3.839135 | 3.444836  | 1.493780  |   |           |           |           |
| H  | -3.468949 | 5.176511  | 1.439060  |   |           |           |           |
| C  | -0.528304 | -3.484756 | -1.127281 |   |           |           |           |
| H  | -0.875183 | -2.573326 | -1.615984 |   |           |           |           |
| H  | -0.538078 | -4.294122 | -1.864717 |   |           |           |           |
| C  | -1.424056 | -3.826492 | 0.068395  |   |           |           |           |
| H  | -1.028129 | -4.711427 | 0.583992  |   |           |           |           |
| H  | -1.383075 | -2.998778 | 0.786486  |   |           |           |           |
| C  | -2.877502 | -4.078944 | -0.353854 |   |           |           |           |
| H  | -3.243863 | -3.217711 | -0.927354 |   |           |           |           |
| H  | -2.913613 | -4.940114 | -1.034738 |   |           |           |           |
| C  | -3.807265 | -4.323018 | 0.838975  |   |           |           |           |
| H  | -4.829768 | -4.529235 | 0.507202  |   |           |           |           |
| H  | -3.471302 | -5.177338 | 1.437912  |   |           |           |           |
| H  | -3.841114 | -3.445630 | 1.493976  |   |           |           |           |
| C  | 1.542270  | 0.000395  | -2.621825 |   |           |           |           |
| N  | 1.864173  | 0.000887  | -3.748897 |   |           |           |           |
| Ir | 0.977194  | -0.000165 | -0.635389 |   |           |           |           |
| C  | -1.106267 | 0.000356  | -0.996359 |   |           |           |           |
| C  | -3.263764 | 0.000763  | -0.071026 |   |           |           |           |
| C  | -3.354434 | 0.000918  | -1.479039 |   |           |           |           |
| C  | -4.627637 | 0.001175  | -2.084200 |   |           |           |           |
| C  | -5.511017 | 0.001204  | 0.199341  |   |           |           |           |
| C  | -5.710774 | 0.001338  | -1.172905 |   |           |           |           |
| H  | -4.770684 | 0.001224  | -3.157341 |   |           |           |           |
| H  | -6.357457 | 0.001328  | 0.879885  |   |           |           |           |
| H  | -6.728753 | 0.001556  | -1.552856 |   |           |           |           |
| N  | -1.892344 | 0.000436  | 0.215819  |   |           |           |           |
| N  | -4.269184 | 0.000886  | 0.796748  |   |           |           |           |
| N  | -2.070415 | 0.000729  | -1.988927 |   |           |           |           |
| C  | -1.800975 | 0.000601  | -3.417838 |   |           |           |           |

**Table S10** Cartesian coordinates of the optimized T<sub>1</sub> geometry of [(pbib)Ir(pmpMe<sub>3</sub>)CN] in toluene.

|    |           |           |           |   |           |           |           |
|----|-----------|-----------|-----------|---|-----------|-----------|-----------|
| C  | -2.889524 | -0.404959 | -0.057125 | H | 1.665210  | 1.536824  | -4.052046 |
| C  | -3.357251 | -1.707215 | 0.067415  | H | 1.864428  | -0.213504 | -4.282123 |
| C  | -3.795370 | 0.648889  | 0.008749  | H | 0.309129  | 0.429036  | -3.703502 |
| C  | -4.702417 | -1.979035 | 0.323428  | C | -0.007187 | 0.058660  | 1.272446  |
| C  | -5.151501 | 0.433810  | 0.258311  | C | 1.455990  | 0.079869  | 1.174590  |
| C  | -5.583391 | -0.890891 | 0.425218  | C | -0.507983 | 0.055642  | 2.608081  |
| H  | -5.078027 | -2.992215 | 0.430595  | C | 2.313047  | -0.012084 | 2.293189  |
| H  | -5.865933 | 1.249456  | 0.316764  | C | 0.340525  | -0.108057 | 3.718073  |
| H  | -6.633673 | -1.081156 | 0.622463  | C | 1.773540  | -0.129860 | 3.553766  |
| C  | -3.599013 | 3.194655  | -0.192523 | C | -0.236965 | -0.257498 | 5.107449  |
| C  | -2.526564 | 3.987336  | -0.451439 | H | 0.483461  | -0.683015 | 5.806605  |
| H  | -4.631138 | 3.445991  | -0.010695 | H | -0.552945 | 0.710996  | 5.519958  |
| H  | -2.450352 | 5.059841  | -0.534644 | H | -1.119379 | -0.903172 | 5.108990  |
| C  | -1.053531 | -4.413251 | -0.492480 | C | 2.698370  | -0.247838 | 4.738615  |
| C  | -2.309502 | -4.027503 | -0.148630 | H | 2.503788  | 0.529593  | 5.486310  |
| H  | -0.629868 | -5.397477 | -0.613859 | H | 2.581758  | -1.212453 | 5.247814  |
| H  | -3.185249 | -4.611386 | 0.082922  | H | 3.740102  | -0.161812 | 4.422141  |
| C  | -1.774355 | 1.852004  | -0.476859 | C | -1.990108 | 0.210407  | 2.870812  |
| N  | -3.132664 | 1.890407  | -0.206254 | H | -2.441785 | 0.861546  | 2.127717  |
| N  | -1.425330 | 3.152637  | -0.624772 | H | -2.523183 | -0.746982 | 2.826413  |
| C  | -1.059341 | -2.147839 | -0.491828 | H | -2.180947 | 0.647256  | 3.853206  |
| N  | -2.305643 | -2.643453 | -0.147745 | H | 3.383464  | 0.018505  | 2.133797  |
| N  | -0.307318 | -3.256410 | -0.700792 |   |           |           |           |
| C  | 1.106547  | -3.262420 | -1.089980 |   |           |           |           |
| H  | 1.222844  | -3.990060 | -1.900361 |   |           |           |           |
| H  | 1.322498  | -2.272414 | -1.493543 |   |           |           |           |
| C  | 2.045748  | -3.598562 | 0.073530  |   |           |           |           |
| H  | 1.920200  | -2.846595 | 0.861773  |   |           |           |           |
| H  | 1.756890  | -4.563771 | 0.510383  |   |           |           |           |
| C  | 3.514145  | -3.652569 | -0.368732 |   |           |           |           |
| H  | 3.784429  | -2.705008 | -0.851185 |   |           |           |           |
| H  | 3.634186  | -4.433189 | -1.132108 |   |           |           |           |
| C  | 4.473370  | -3.917011 | 0.795789  |   |           |           |           |
| H  | 5.509999  | -3.973236 | 0.448938  |   |           |           |           |
| H  | 4.414554  | -3.114949 | 1.539472  |   |           |           |           |
| H  | 4.237564  | -4.861113 | 1.300372  |   |           |           |           |
| C  | -0.058993 | 3.626646  | -0.862990 |   |           |           |           |
| H  | 0.482273  | 2.796891  | -1.321013 |   |           |           |           |
| H  | -0.110978 | 4.446326  | -1.587124 |   |           |           |           |
| C  | 0.640144  | 4.078329  | 0.423996  |   |           |           |           |
| H  | 0.062360  | 4.886821  | 0.891405  |   |           |           |           |
| H  | 0.642517  | 3.241135  | 1.132844  |   |           |           |           |
| C  | 2.077389  | 4.548688  | 0.166818  |   |           |           |           |
| H  | 2.642032  | 3.739617  | -0.314435 |   |           |           |           |
| H  | 2.065866  | 5.382763  | -0.547857 |   |           |           |           |
| C  | 2.797892  | 4.980178  | 1.447979  |   |           |           |           |
| H  | 3.818872  | 5.312574  | 1.235431  |   |           |           |           |
| H  | 2.272677  | 5.806839  | 1.940001  |   |           |           |           |
| H  | 2.859003  | 4.151904  | 2.162547  |   |           |           |           |
| C  | -1.682538 | -0.160047 | -2.502595 |   |           |           |           |
| N  | -2.100183 | -0.221714 | -3.595604 |   |           |           |           |
| Ir | -0.976747 | -0.058944 | -0.578028 |   |           |           |           |
| C  | 1.023062  | 0.265596  | -1.172113 |   |           |           |           |
| C  | 3.283672  | 0.317609  | -0.550667 |   |           |           |           |
| C  | 3.176978  | 0.456435  | -1.949548 |   |           |           |           |
| C  | 4.349033  | 0.601727  | -2.717724 |   |           |           |           |
| C  | 5.545289  | 0.435089  | -0.590643 |   |           |           |           |
| C  | 5.549232  | 0.583378  | -1.969226 |   |           |           |           |
| H  | 4.336957  | 0.717133  | -3.794108 |   |           |           |           |
| H  | 6.477800  | 0.423387  | -0.033883 |   |           |           |           |
| H  | 6.501563  | 0.688281  | -2.481735 |   |           |           |           |
| N  | 1.962066  | 0.210768  | -0.085569 |   |           |           |           |
| N  | 4.402139  | 0.296225  | 0.164868  |   |           |           |           |
| N  | 1.837635  | 0.417275  | -2.282861 |   |           |           |           |
| C  | 1.388505  | 0.551572  | -3.659057 |   |           |           |           |

**Table S11** Cartesian coordinates of the optimized  $T_1$  geometry of **[(pbib)Ir(pmpMe<sub>2</sub>Bz)CN]** in toluene.

|    |           |           |           |   |           |           |           |
|----|-----------|-----------|-----------|---|-----------|-----------|-----------|
| C  | 2.882711  | 1.209067  | -0.335939 | H | -3.031393 | 0.032168  | -2.933667 |
| C  | 3.222166  | 2.241385  | 0.530255  | H | -1.604380 | 1.021693  | -2.573240 |
| C  | 3.859578  | 0.664556  | -1.161010 | C | 1.173012  | -0.884066 | 0.993662  |
| C  | 4.526910  | 2.733034  | 0.604108  | C | -0.028178 | -1.657079 | 1.292272  |
| C  | 5.179693  | 1.117889  | -1.126854 | C | 2.306768  | -1.232096 | 1.752335  |
| C  | 5.492943  | 2.153308  | -0.232700 | C | -0.047778 | -2.678591 | 2.273590  |
| H  | 4.805087  | 3.538645  | 1.276869  | C | 2.312611  | -2.232442 | 2.720389  |
| H  | 5.952269  | 0.700304  | -1.765414 | C | 1.098961  | -2.971495 | 2.984326  |
| H  | 6.513344  | 2.521147  | -0.191086 | C | 3.568698  | -2.544164 | 3.488379  |
| C  | 3.882588  | -1.151118 | -2.963407 | H | 3.881169  | -3.586631 | 3.347403  |
| C  | 2.886190  | -1.931841 | -3.456530 | H | 4.391603  | -1.899520 | 3.170784  |
| H  | 4.926480  | -1.095240 | -3.225369 | H | 3.427726  | -2.406612 | 4.567958  |
| H  | 2.900884  | -2.686129 | -4.227090 | C | 1.083270  | -4.056183 | 4.028263  |
| C  | 0.641558  | 3.613409  | 2.631005  | H | 1.808260  | -4.845839 | 3.795979  |
| C  | 1.944947  | 3.639822  | 2.249501  | H | 1.355250  | -3.665039 | 5.016269  |
| H  | 0.111552  | 4.203742  | 3.361404  | H | 0.094693  | -4.514008 | 4.104293  |
| H  | 2.762477  | 4.257886  | 2.582886  | H | -0.970610 | -3.218255 | 2.446876  |
| C  | 1.953242  | -0.616928 | -1.867021 | H | 3.231281  | -0.689766 | 1.574116  |
| N  | 3.306135  | -0.351806 | -1.991227 | C | -3.451344 | 1.827489  | -1.820625 |
| N  | 1.718508  | -1.590759 | -2.779191 | C | -4.818350 | 1.804948  | -2.124856 |
| C  | 0.877567  | 2.039524  | 1.020509  | C | -2.915538 | 2.973271  | -1.213573 |
| N  | 2.083237  | 2.672793  | 1.268580  | C | -5.641978 | 2.886465  | -1.802692 |
| N  | 0.006939  | 2.632991  | 1.872536  | H | -5.241862 | 0.944577  | -2.636359 |
| C  | -1.397574 | 2.248013  | 2.046632  | C | -3.736196 | 4.054483  | -0.890182 |
| H  | -1.992893 | 3.165440  | 2.098997  | H | -1.847391 | 3.025335  | -1.029497 |
| H  | -1.687915 | 1.709509  | 1.144180  | C | -5.103657 | 4.011564  | -1.176676 |
| C  | -1.622656 | 1.381125  | 3.290346  | H | -6.700040 | 2.850765  | -2.046482 |
| H  | -1.004616 | 0.478703  | 3.208614  | H | -3.304854 | 4.938724  | -0.428999 |
| H  | -1.277607 | 1.919248  | 4.183271  | H | -5.741121 | 4.855132  | -0.927336 |
| C  | -3.096660 | 0.989989  | 3.459388  |   |           |           |           |
| H  | -3.448154 | 0.496466  | 2.544327  |   |           |           |           |
| H  | -3.703479 | 1.898672  | 3.570382  |   |           |           |           |
| C  | -3.330081 | 0.063642  | 4.656832  |   |           |           |           |
| H  | -4.390937 | -0.183414 | 4.764775  |   |           |           |           |
| H  | -2.780072 | -0.876318 | 4.537843  |   |           |           |           |
| H  | -2.998471 | 0.529822  | 5.591820  |   |           |           |           |
| C  | 0.423956  | -2.242701 | -3.000141 |   |           |           |           |
| H  | -0.340227 | -1.546285 | -2.653373 |   |           |           |           |
| H  | 0.300994  | -2.377021 | -4.079836 |   |           |           |           |
| C  | 0.300583  | -3.583099 | -2.267243 |   |           |           |           |
| H  | 1.115989  | -4.249109 | -2.579070 |   |           |           |           |
| H  | 0.429572  | -3.409352 | -1.192179 |   |           |           |           |
| C  | -1.051078 | -4.261204 | -2.527898 |   |           |           |           |
| H  | -1.861780 | -3.563509 | -2.281336 |   |           |           |           |
| H  | -1.147539 | -4.478413 | -3.600298 |   |           |           |           |
| C  | -1.232027 | -5.550512 | -1.720562 |   |           |           |           |
| H  | -2.191043 | -6.027184 | -1.946807 |   |           |           |           |
| H  | -0.438641 | -6.273803 | -1.941520 |   |           |           |           |
| H  | -1.208927 | -5.344301 | -0.644968 |   |           |           |           |
| C  | 0.622566  | 1.968198  | -1.903196 |   |           |           |           |
| N  | 0.425790  | 2.769780  | -2.735608 |   |           |           |           |
| Ir | 0.987613  | 0.555782  | -0.442116 |   |           |           |           |
| C  | -0.967407 | -0.260567 | -0.423194 |   |           |           |           |
| C  | -2.410831 | -1.863425 | 0.501642  |   |           |           |           |
| C  | -3.090025 | -1.150249 | -0.511786 |   |           |           |           |
| C  | -4.418455 | -1.511611 | -0.810851 |   |           |           |           |
| C  | -4.186886 | -3.194777 | 0.947856  |   |           |           |           |
| C  | -4.941634 | -2.569272 | -0.033155 |   |           |           |           |
| H  | -5.008006 | -1.015302 | -1.568445 |   |           |           |           |
| H  | -4.607417 | -4.002807 | 1.539340  |   |           |           |           |
| H  | -5.962011 | -2.901507 | -0.202591 |   |           |           |           |
| N  | -1.121193 | -1.320647 | 0.548378  |   |           |           |           |
| N  | -2.887830 | -2.857068 | 1.240513  |   |           |           |           |
| N  | -2.214419 | -0.215982 | -1.037080 |   |           |           |           |
| C  | -2.549451 | 0.655086  | -2.170993 |   |           |           |           |



**Table S12** Cartesian coordinates of the optimized  $T_1$  geometry of **[(pbib)Ir(pmpMe<sub>3</sub>Bz)CN]** in toluene.

|    |           |           |           |   |           |           |           |
|----|-----------|-----------|-----------|---|-----------|-----------|-----------|
| C  | -2.747685 | -1.460243 | 0.074479  | H | 2.853992  | -0.885861 | -3.066740 |
| C  | -2.967717 | -2.256007 | 1.191926  | H | 1.495840  | -1.746023 | -2.319915 |
| C  | -3.727066 | -1.393660 | -0.911644 | C | -1.069761 | 1.228291  | 0.677250  |
| C  | -4.172480 | -2.935830 | 1.379594  | C | 0.210353  | 1.945022  | 0.751514  |
| C  | -4.948683 | -2.054722 | -0.776131 | C | -2.158721 | 1.901747  | 1.301235  |
| C  | -5.156428 | -2.813028 | 0.386160  | C | 0.385989  | 3.152972  | 1.465414  |
| H  | -4.358095 | -3.554737 | 2.252307  | C | -1.972200 | 3.068079  | 2.067595  |
| H  | -5.721567 | -2.004682 | -1.537218 | C | -0.679350 | 3.706189  | 2.136922  |
| H  | -6.100090 | -3.334184 | 0.512989  | C | -3.129384 | 3.674625  | 2.827309  |
| C  | -3.920703 | -0.194883 | -3.165734 | H | -3.801689 | 4.232980  | 2.160616  |
| C  | -3.033643 | 0.581197  | -3.841086 | H | -3.737561 | 2.906788  | 3.313786  |
| H  | -4.924920 | -0.495370 | -3.416233 | H | -2.795203 | 4.368650  | 3.598979  |
| H  | -3.122327 | 1.085748  | -4.790062 | C | -0.475782 | 4.984984  | 2.909190  |
| C  | -0.304849 | -2.619947 | 3.584241  | H | -1.166069 | 5.771547  | 2.583150  |
| C  | -1.585007 | -2.911937 | 3.237731  | H | -0.646168 | 4.840540  | 3.983155  |
| H  | 0.272507  | -2.910612 | 4.447350  | H | 0.544219  | 5.353288  | 2.779721  |
| H  | -2.331076 | -3.505608 | 3.740154  | H | 1.360843  | 3.623400  | 1.462862  |
| C  | -2.000285 | -0.075464 | -1.936037 | C | 3.426890  | -2.297857 | -1.547930 |
| N  | -3.284960 | -0.590244 | -2.000399 | C | 4.673594  | -2.517003 | -2.145232 |
| N  | -1.869539 | 0.640644  | -3.079073 | C | 3.071313  | -3.063014 | -0.427571 |
| C  | -0.688246 | -1.600829 | 1.596568  | C | 5.557799  | -3.468328 | -1.629028 |
| N  | -1.814183 | -2.282689 | 2.026444  | H | 4.952475  | -1.946802 | -3.028416 |
| N  | 0.225882  | -1.821365 | 2.574484  | C | 3.953117  | -4.010405 | 0.091955  |
| C  | 1.578110  | -1.255147 | 2.617589  | H | 2.090873  | -2.929031 | 0.017270  |
| H  | 2.274120  | -2.065475 | 2.859475  | C | 5.201211  | -4.213812 | -0.505039 |
| H  | 1.804123  | -0.910796 | 1.608028  | H | 6.521464  | -3.624889 | -2.105524 |
| C  | 1.705340  | -0.113812 | 3.633023  | H | 3.661842  | -4.601142 | 0.956128  |
| H  | 0.989470  | 0.675265  | 3.372866  | H | 5.885751  | -4.954161 | -0.100869 |
| H  | 1.423057  | -0.479197 | 4.629458  | C | -3.567529 | 1.363660  | 1.177557  |
| C  | 3.124763  | 0.466336  | 3.681576  | H | -3.695639 | 0.840216  | 0.235241  |
| H  | 3.402723  | 0.832787  | 2.685637  | H | -3.811153 | 0.652202  | 1.976742  |
| H  | 3.836969  | -0.332880 | 3.927252  | H | -4.308591 | 2.165360  | 1.218272  |
| C  | 3.260784  | 1.606248  | 4.695939  |   |           |           |           |
| H  | 4.281999  | 1.999720  | 4.714269  |   |           |           |           |
| H  | 2.588905  | 2.434977  | 4.446607  |   |           |           |           |
| H  | 3.013688  | 1.269431  | 5.709343  |   |           |           |           |
| C  | -0.691729 | 1.436524  | -3.436019 |   |           |           |           |
| H  | 0.152962  | 1.001108  | -2.899617 |   |           |           |           |
| H  | -0.518240 | 1.312739  | -4.510029 |   |           |           |           |
| C  | -0.851706 | 2.917872  | -3.076256 |   |           |           |           |
| H  | -1.729939 | 3.327590  | -3.592797 |   |           |           |           |
| H  | -1.052473 | 2.996931  | -2.000751 |   |           |           |           |
| C  | 0.392671  | 3.739204  | -3.436687 |   |           |           |           |
| H  | 1.268510  | 3.309351  | -2.933627 |   |           |           |           |
| H  | 0.585438  | 3.655246  | -4.514808 |   |           |           |           |
| C  | 0.259207  | 5.215945  | -3.051752 |   |           |           |           |
| H  | 1.157693  | 5.778912  | -3.323526 |   |           |           |           |
| H  | -0.593785 | 5.682949  | -3.557343 |   |           |           |           |
| H  | 0.109292  | 5.328218  | -1.972258 |   |           |           |           |
| C  | -0.545815 | -2.421280 | -1.197969 |   |           |           |           |
| N  | -0.345001 | -3.439315 | -1.742106 |   |           |           |           |
| Ir | -0.935800 | -0.643823 | -0.248648 |   |           |           |           |
| C  | 0.994024  | 0.132954  | -0.605410 |   |           |           |           |
| C  | 2.560499  | 1.818206  | -0.157705 |   |           |           |           |
| C  | 3.148424  | 0.842247  | -0.991070 |   |           |           |           |
| C  | 4.477137  | 1.029850  | -1.418808 |   |           |           |           |
| C  | 4.430446  | 3.096162  | -0.115435 |   |           |           |           |
| C  | 5.098010  | 2.205040  | -0.943123 |   |           |           |           |
| H  | 4.997538  | 0.319385  | -2.045986 |   |           |           |           |
| H  | 4.924036  | 3.993683  | 0.245683  |   |           |           |           |
| H  | 6.124914  | 2.418981  | -1.225917 |   |           |           |           |
| N  | 1.243961  | 1.380653  | 0.065261  |   |           |           |           |
| N  | 3.133228  | 2.923304  | 0.300816  |   |           |           |           |
| N  | 2.203689  | -0.136863 | -1.236573 |   |           |           |           |
| C  | 2.459155  | -1.276321 | -2.121065 |   |           |           |           |

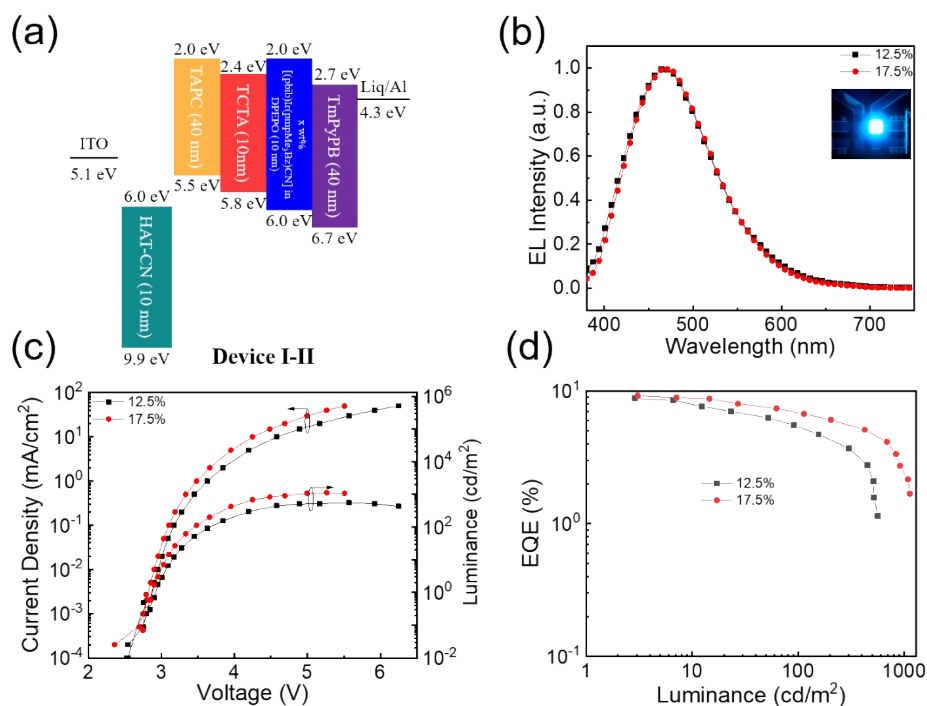

**Figure S48** Device I-II based on [(pbib)Ir(pmpMe<sub>3</sub>Bz)CN] as dopant (a) Energy diagram of the materials used in the OLEDs. (b) EL spectra of all devices. (c) Current density–voltage–luminance ( $J$ – $V$ – $L$ ) characteristics. (d) EQE vs luminance.

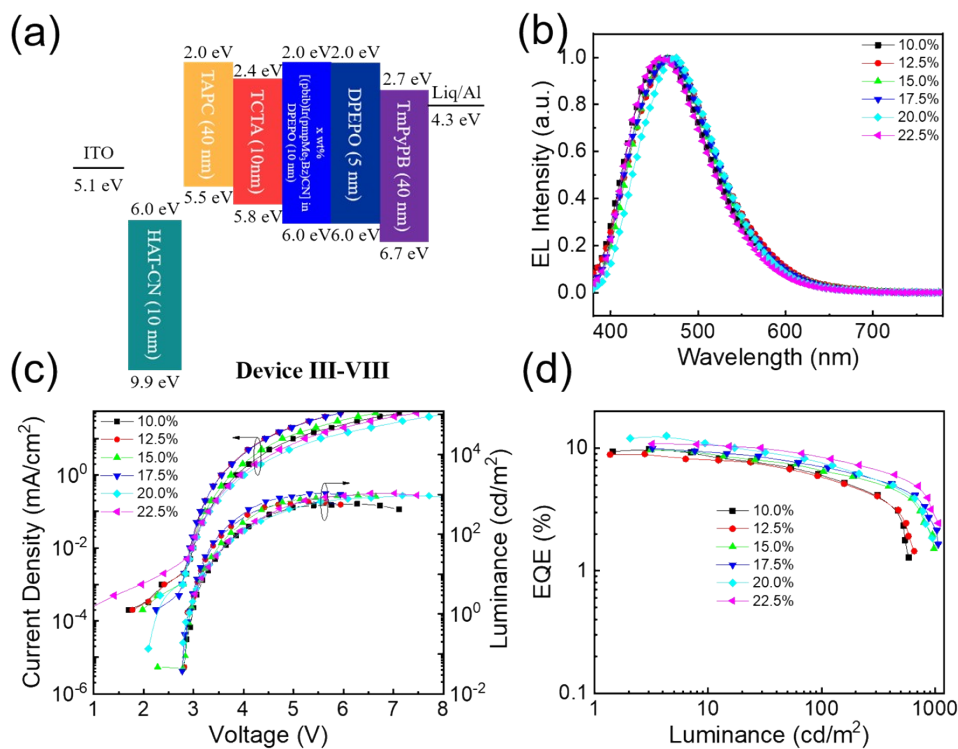

**Figure S49** Device III-VIII based on [(pbib)Ir(pmpMe<sub>3</sub>Bz)CN] as dopant (a) Energy diagram of the materials used in the OLEDs. (b) EL spectra of all devices. (c) current density–voltage–luminance ( $J$ – $V$ – $L$ ) characteristics. (d) EQE

vs luminance.

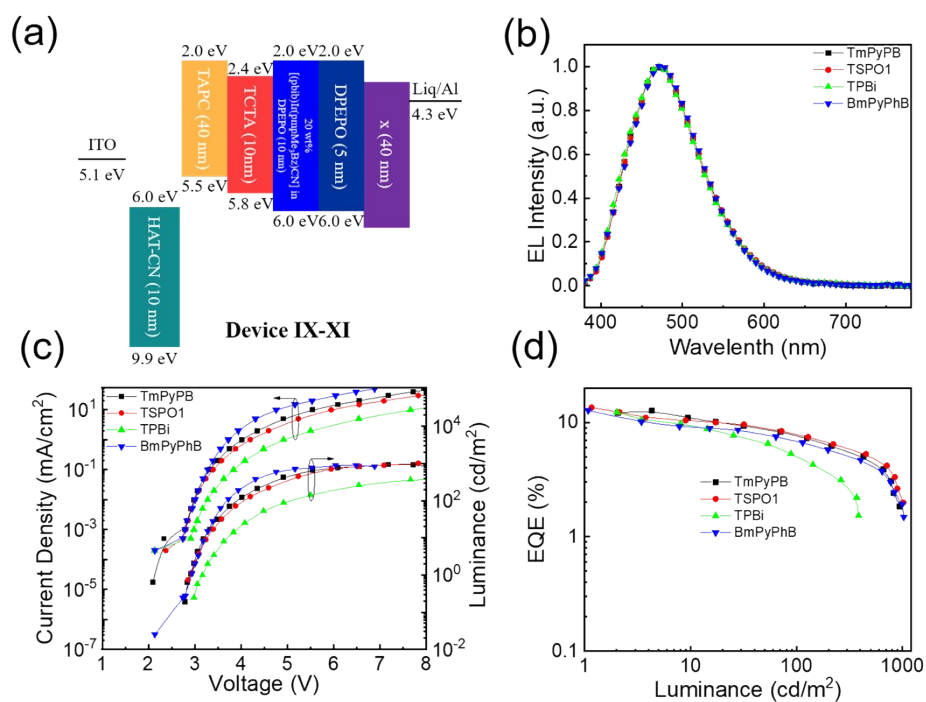

**Figure S50** Device IX-XI based on  $[(pbib)Ir(pmpMe_3Bz)CN]$  as dopant (a) Energy diagram of the materials used in the OLEDs. (b) EL spectra of all devices. (c) Current density–voltage–luminance ( $J-V-L$ ) characteristics. (d) EQE vs luminance.

**Table S13** Blue phosphorescent and TADF materials with lifetimes less than 1  $\mu$ s

| Complexes                           | $\tau(\mu\text{s})$ | $\lambda(\text{nm})$ | PLQY            | EQE(%)         | CIE(x,y)      | Ref       |
|-------------------------------------|---------------------|----------------------|-----------------|----------------|---------------|-----------|
| Ir(bpzb)(ppy)CN                     | 0.0047              | 449,481,508          | 0.005           | -              |               |           |
| Ir(dfbpzb)(ppy)Cl                   | 0.00018             | 456,490,518          | 0.0004          | -              | -             |           |
| Ir(dfbpzb)(ppy)CN                   | 0.0028              | 447,480,506          | 0.004           | -              |               | 18        |
| Ir(dmbpzb)(ppy)Cl                   | 0.00079             | 460,493,522          | 0.0005          | -              |               |           |
| Ir(dmbpzb)(ppy)CN                   | 0.014               | 449,481,508          | 0.008           | -              |               |           |
| <i>fac</i> -Ir(pmi) <sub>3</sub>    | 0.4                 | -                    | 0.02            | -              | -             |           |
| <i>mer</i> -Ir(pmi) <sub>3</sub>    | 0.62                | -                    | 0.05            | -              | -             | 19        |
| <i>fac</i> -Ir(pmb) <sub>3</sub>    | 0.22                | -                    | 0.04            | -              | -             |           |
| <i>mer</i> -Ir(pmb) <sub>3</sub>    | 0.015               | -                    | 0.002           | -              | -             |           |
| Ir2                                 | 0.63                | 470                  | 0.95            | 8.9            | 0.15,0.23     | 20        |
| <i>mer</i> -Ir(pmp) <sub>3</sub>    | 0.8 $\pm$ 0.1       | 465                  | 0.78 $\pm$ 0.05 | 14.4 $\pm$ 0.4 | (0.16,0.15)   | 21        |
| <i>mer</i> -Ir-1                    | 0.67                | 470                  | 0.95            | 24.8           | (0.149,0.085) | 22        |
| MS-2                                | 0.8                 | 475,499,505          | 0.88            | 30.1           | (0.15,0.38)   | 23        |
| MS-17                               | 0.6                 | 462,475,488          | 0.88            | 31.2           | (0.15,0.32)   |           |
| 3DPyM-pDTC                          | 0.27                | 464                  | 0.98            | 31.9           | (0.14,0.18)   | 24        |
| MCz-BOBO                            | 0.78                | 476                  | 0.5             | 20.1           | (0.13,0.20)   | 25        |
| OBA-BrS                             | 0.81                | 478                  | 0.305           | 9.2            | (0.29,0.46)   | 26        |
| [(pbib)Ir(pmpMe <sub>2</sub> )CN]   | 0.32                | 434                  | 0.42            | 10.1           | (0.20,0.30)   |           |
| [(pbib)Ir(pmpMe <sub>3</sub> )CN]   | 1.10                | 426                  | 0.61            | 11.2           | (0.16,0.07)   | This work |
| [(pbib)Ir(pmpMe <sub>2</sub> Bz)CN] | 0.68                | 428                  | 0.44            | 11.7           | (0.20,0.28)   |           |
| [(pbib)Ir(pmpMe <sub>3</sub> Bz)CN] | 0.78                | 434                  | 0.39            | 13.5           | (0.17,0.20)   |           |

## References

1. Frisch, M. J.; Trucks, G. W.; Schlegel, H. B.; Scuseria, G. E.; Robb, M. A.; Cheeseman, J. R.; Scalmani, G.; Barone, V.; Petersson, G. A.; Nakatsuji, H.; Li, X.; Caricato, M.; Marenich, A. V.; Bloino, J.; Janesko, B. G.; Gomperts, R.; Mennucci, B.; Hratchian, H. P.; Ortiz, J. V.; Izmaylov, A. F.; Sonnenberg, J. L.; Williams-Young, D.; Ding, F.; Lipparini, F.; Egidi, F.; Goings, J.; Peng, B.; Petrone, A.; Henderson, T.; Ranasinghe, D.; Zarkrzewski, V. G.; Gao, J.; Rega, N.; Zheng, G.; Liang, W.; Hada, M.; Ehara, M.; Toyota, K.; Fukuda, R.; Hasegawa, J.; Ishida, M.; Nakajima, T.; Honda, Y.; Kitao, O.; Nakai, H.; Vreven, T.; Throssell, K.; Montgomery, J. J. A.; Peralta, J. E.; Ogliaro, F.; Bearpark, M. J.; Heyd, J. J.; Brothers, E. N.; Kudin, K. N.; Staroverov, V. N.; Keith, T. A.; Kobayashi, R.; Normand, J.; Raghavachari, K.; Rendell, A. P.; Burant, J. C.; Iyengar, S. S.; Tomasi, J.; Cossi, M.; Millam, J. M.; Klene, M.; Adamo, C.; Cammi, R.; Ochterski, J. W.; Martin, R. L.; Morokuma, K.; Farkas, O.; Foresman, J. B.; Fox, D. J. *Gaussian 16, Revision B.01*, Gaussian, Inc.: Wallingford CT, 2016.
2. Becke, A. D., Density-functional thermochemistry. 3. The role of exact exchange. *J. Chem. Phys.* **1993**, *98* (7), 5648-5652.
3. Lee, C. T.; Yang, W. T.; Parr, R. G., Development of the colle-salvetti correlation-energy formula into a functional of the electron-density. *Phys. Rev. B* **1988**, *37* (2), 785-789.
4. Vosko, S. H.; Wilk, L.; Nusair, M., Accurate spin-dependent electron liquid correlation energies for local spin-density calculations - A critical analysis. *Can. J. Phys.* **1980**, *58* (8), 1200-1211.
5. Stephens, P. J.; Devlin, F. J.; Chabalowski, C. F.; Frisch, M. J., Ab initio calculation of vibrational absorption and circular dichroism spectra using density functional force fields. *J. Phys. Chem.* **1994**, *98* (45), 11623-11627.
6. Barone, V.; Cossi, M., Quantum calculation of molecular energies and energy gradients in solution by a conductor solvent model. *J. Phys. Chem. A* **1998**, *102* (11), 1995-2001.
7. Cossi, M.; Rega, N.; Scalmani, G.; Barone, V., Energies, structures, and electronic

properties of molecules in solution with the C-PCM solvation model. *J. Comput. Chem.* **2003**, *24* (6), 669-681.

8. Stratmann, R. E.; Scuseria, G. E.; Frisch, M. J., An efficient implementation of time-dependent density-functional theory for the calculation of excitation energies of large molecules. *J. Chem. Phys.* **1998**, *109* (19), 8218-8224.

9. Bauernschmitt, R.; Ahlrichs, R., Treatment of electronic excitations within the adiabatic approximation of time dependent density functional theory. *Chem. Phys. Lett.* **1996**, *256* (4-5), 454-464.

10. Casida, M. E.; Jamorski, C.; Casida, K. C.; Salahub, D. R., Molecular excitation energies to high-lying bound states from time-dependent density-functional response theory: Characterization and correction of the time-dependent local density approximation ionization threshold. *J. Chem. Phys.* **1998**, *108* (11), 4439-4449.

11. Hay, P. J.; Wadt, W. R., Ab initio effective core potentials for molecular calculations - Potentials for the transition-metal atoms Sc to Hg. *J. Chem. Phys.* **1985**, *82* (1), 270-283.

12. Wadt, W. R.; Hay, P. J., Ab initio effective core potentials for molecular calculations - Potentials for main group elements Na to Bi. *J. Chem. Phys.* **1985**, *82* (1), 284-298.

13. Hay, P. J.; Wadt, W. R., Ab initio effective core potentials for molecular calculations - Potentials for K to Au including the outermost core orbitals. *J. Chem. Phys.* **1985**, *82* (1), 299-310.

14. Ehlers, A. W.; Böhme, M.; Dapprich, S.; Gobbi, A.; Höllwarth, A.; Jonas, V.; Köhler, K. F.; Stegmann, R.; Veldkamp, A.; Frenking, G., A set of f-polarization functions for pseudo-potential basis-sets of the transition-metals Sc-Cu, Y-Ag and La-Au. *Chem. Phys. Lett.* **1993**, *208* (1-2), 111-114.

15. Hehre, W. J.; Ditchfie.R; Pople, J. A., Self-consistent molecular orbital methods. XII. Further extensions of Gaussian-type basis sets for use in molecular orbital studies of organic molecules. *J. Chem. Phys.* **1972**, *56* (5), 2257-2261.

16. Hariharan, P. C.; Pople, J. A., The influence of polarization functions on molecular-orbital hydrogenation energies. *Theor. Chim. Acta.* **1973**, *28* (3), 213-222.

17. Francl, M. M.; Pietro, W. J.; Hehre, W. J.; Binkley, J. S.; Gordon, M. S.; Defrees, D. J.; Pople, J. A., Self-Consistent Molecular-Orbital Methods .23. A Polarization-Type Basis Set for 2nd-Row Elements. *J. Chem. Phys.* **1982**, *77* (7), 3654-3665.
18. Yang, L.; Okuda, F.; Kobayashi, K.; Nozaki, K.; Tanabe, Y.; Ishii, Y.; Haga, M.-a., Syntheses and phosphorescent properties of blue emissive iridium complexes with tridentate pyrazolyl ligands. *Inorg. Chem.* **2008**, *47* (16), 7154-7165.
19. Sajoto, T.; Djurovich, P. I.; Tamayo, A.; Yousufuddin, M.; Bau, R.; Thompson, M. E.; Holmes, R. J.; Forrest, S. R., Blue and near-UV phosphorescence from iridium complexes with cyclometalated pyrazolyl or N-heterocyclic carbene ligands. *Inorg. Chem.* **2005**, *44* (22), 7992-8003.
20. Cheng, W.; Wang, L.-D.; Zhou, Y.-Y.; Bian, Z.-Q.; Tong, B.-H.; Liu, Z.-W.; Wang, S., Blue iridium(III) complexes with high internal quantum efficiency based on 4-(pyridin-3-yl)pyrimidine derivative and their electroluminescent properties. *Dyes and Pigments* **2020**, *177*, 108257.
21. Lee, J.; Chen, H. F.; Batagoda, T.; Coburn, C.; Djurovich, P. I.; Thompson, M. E.; Forrest, S. R., Deep blue phosphorescent organic light-emitting diodes with very high brightness and efficiency. *Nat. Mater.* **2016**, *15* (1), 92-98.
22. Park, H. Y.; Maheshwaran, A.; Moon, C. K.; Lee, H.; Reddy, S. S.; Sree, V. G.; Yoon, J.; Kim, J. W.; Kwon, J. H.; Kim, J. J.; Jin, S. H., External Quantum Efficiency Exceeding 24% with CIE<sub>y</sub> Value of 0.08 using a Novel Carbene-Based Iridium Complex in Deep-Blue Phosphorescent Organic Light-Emitting Diodes. *Adv. Mater.* **2020**, *32* (29), 2002120.
23. Sarma, M.; Tsai, W.-L.; Lee, W.-K.; Chi, Y.; Wu, C.-C.; Liu, S.-H.; Chou, P.-T.; Wong, K.-T., Anomalously Long-Lasting Blue PhOLED Featuring Phenyl-Pyrimidine Cyclometalated Iridium Emitter. *Chem* **2017**, *3* (3), 461-476.
24. Rajamalli, P.; Senthilkumar, N.; Huang, P. Y.; Ren-Wu, C. C.; Lin, H. W.; Cheng, C. H., New Molecular Design Concurrently Providing Superior Pure Blue, Thermally Activated Delayed Fluorescence and Optical Out-Coupling Efficiencies. *J. Am. Chem. Soc.* **2017**, *139* (32), 10948-10951.

25. Agou, T.; Matsuo, K.; Kawano, R.; Park, I. S.; Hosoya, T.; Fukumoto, H.; Kubota, T.; Mizuhata, Y.; Tokitoh, N.; Yasuda, T., Pentacyclic Ladder-Heteraborin Emitters Exhibiting High-Efficiency Blue Thermally Activated Delayed Fluorescence with an Ultrashort Emission Lifetime. *ACS Materials Lett.* **2019**, 2 (1), 28-34.
26. Song, D.; Yu, Y.; Yue, L.; Zhong, D.; Zhang, Y.; Yang, X.; Sun, Y.; Zhou, G.; Wu, Z., Asymmetric thermally activated delayed fluorescence (TADF) emitters with 5,9-dioxa-13b-boranaphtho[3,2,1-de]anthracene (OBA) as the acceptor and highly efficient blue-emitting OLEDs. *J. Mater. Chem. C* **2019**, 7 (38), 11953-11963.
